# Supplementary material for: Oligosaccharide synthesis on soluble high-molecular weight pHEMA using a photo-cleavable linker
Source: Royal Society of Chemistry journal article supplement (doi:10.1039/c8ra08252a), 2018-01-01

# **Oligosaccharide Synthesis on Soluble High-Molecular Weight Polymer pHEMA Using a Photo-Cleavable Linker**

Abhishek Vartak, Sandeep Thanna, Kyle Meyer, Miranda Dermanelian,  
Steven J. Sucheck\*

Department of Chemistry and Biochemistry, University of Toledo. 2801 W. Bancroft Street,  
Toledo, Ohio 43606, USA.

## **Supplementary Information**

### Table of contents

|                                                                          |      |
|--------------------------------------------------------------------------|------|
| 1. <sup>1</sup> H NMR of pHEMA bound monosaccharide and their comparison | 1    |
| 2. Polymer percentage recovery comparison between pHEMA and Boltron H40  | 2    |
| 3. MS and NMR data of novel compounds                                    | 3-47 |

### Percentage loading calculations:

Polymer bound monosaccharide **7** (20 mg) was dissolved in 0.8 mL of CDCl<sub>3</sub> containing 1% TMS V/V. The TMS peak was integrated as 1 proton at chemical shift value 0.0 and remaining saccharide peaks were integrated accordingly.

The ratio between analyte and internal standard:

$$r_{A/IS} = (0.007/1) / (1/12) = 0.084$$

The sample contains 5.2 mg of TMS:

$$n_{IS} = 5.2 / 88 = 0.059 \text{ mmol.}$$

$$n_A = n_{IS} * r_{A/IS} = 0.005 \text{ mmol} / 20 \text{ mg of polymer} = 0.25 \text{ mmol/g of polymer.}$$

**Figure S1.** <sup>1</sup>H NMR of pHEMA bound monosaccharide

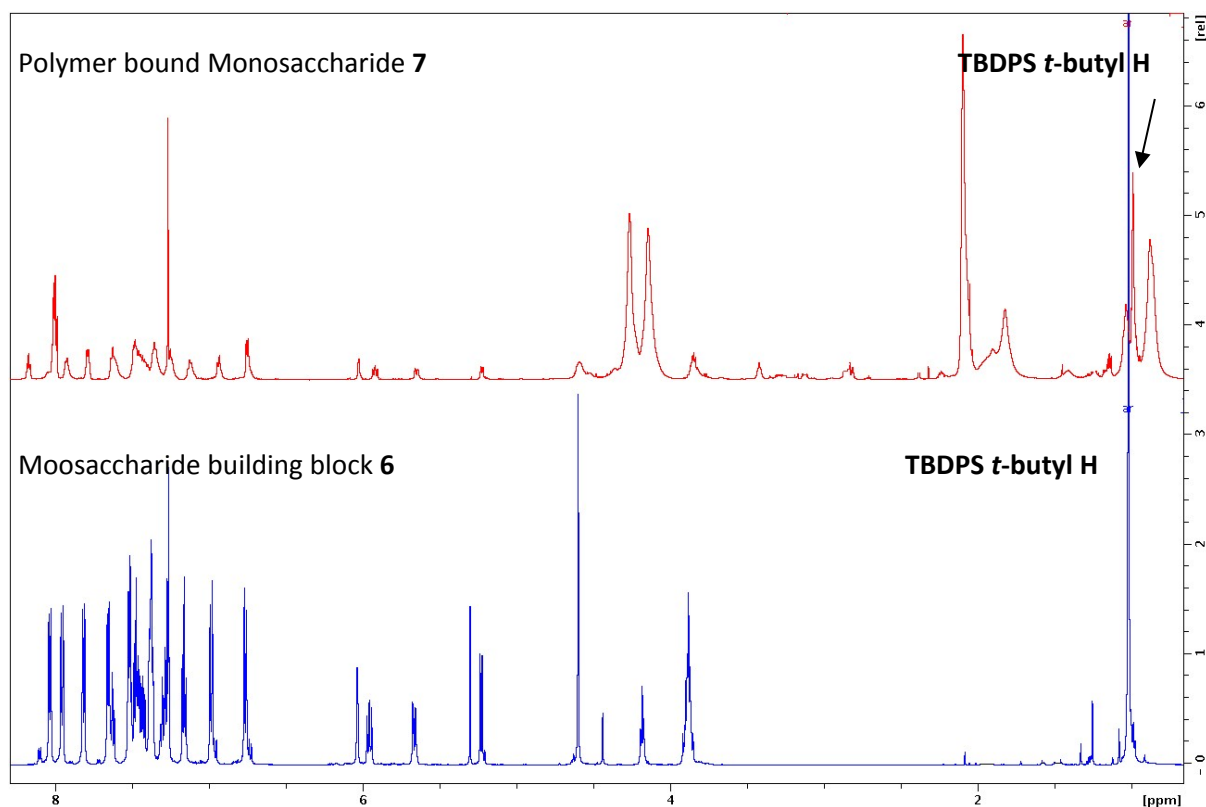

**Figure S2.**  $^1\text{H}$  NMR of pHEMA bound oligosaccharide **7** and **8** (TBDPS de-protection)

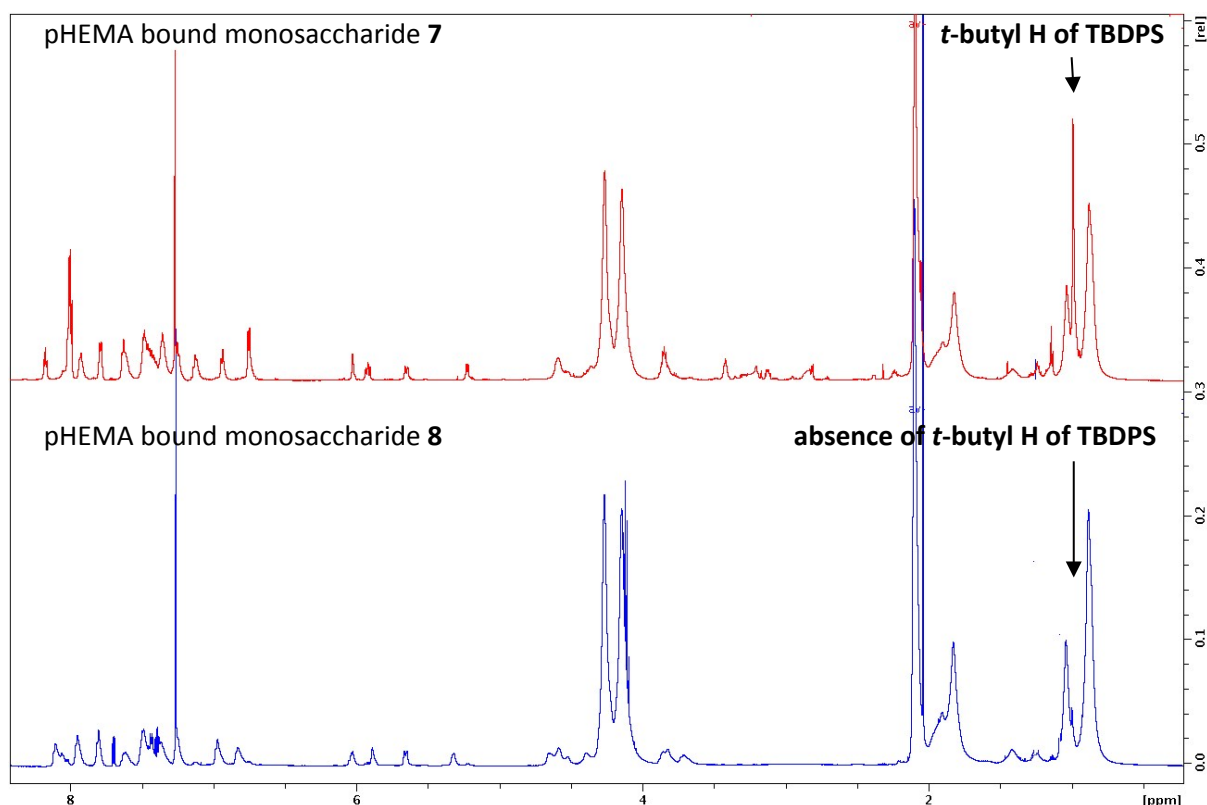

### Polymer percentage recovery comparison between pHEMA and Boltron H40

To compare pHEMA recovery with other polymer support, we decided to use hyper branched Boltron H40 polymer for model tri-galactoside synthesis. Both polymers were recovered using precipitation method. The average recovery of pHEMA over 2 cycles of de-protections and glycosylations was 91% compared to 64% of Boltron H40.

| Polymer bound product                   | pHEMA Recovery (%) | Boltron H40 Recovery (%) |
|-----------------------------------------|--------------------|--------------------------|
| Loading and Capping <b>7</b>            | 80                 | 58                       |
| 1 <sup>st</sup> De-protection <b>8</b>  | 94                 | 71                       |
| Glycosylation <b>9</b>                  | 90                 | 55                       |
| 2 <sup>nd</sup> De-protection <b>10</b> | 92                 | 64                       |
| Glycosylation <b>11</b>                 | 89                 | 65                       |

**Table S1.** Percentage recovery comparison between pHEMA and Boltron H40 using Precipitation method.

HRMS data of ethyl-2,3,4-tri-*O*-benzoyl-6-*O*-*t*-butyldiphenylsilyl 1-thio- $\beta$ -D-galactopyranoside (A)

GS\_0906\_AV\_424 9 (0.170) AM (Cen,4, 80.00, Ar,8000.0,556.28,0.70); Cm (7:13)

TOF MS ES+  
1.20e3

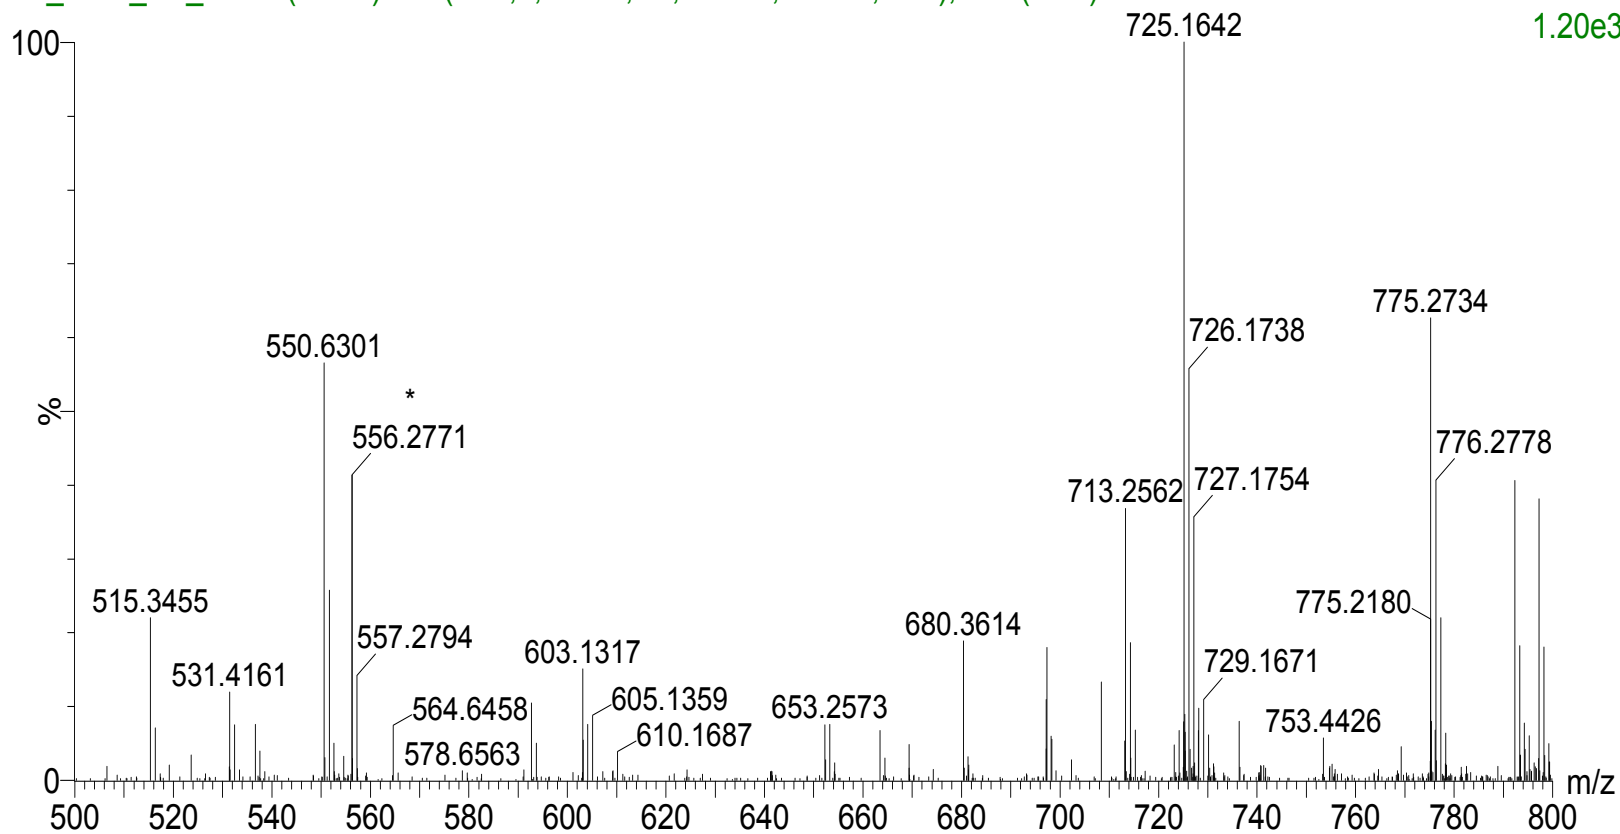

$$\text{Mass accuracy} = ((775.2761 - 775.2734) / 775.2761) * 10^6 = 3.5 \text{ ppm}$$

<sup>1</sup>H NMR of ethyl-2,3,4-tri-O-benzoyl-6-O-t-butylidiphenylsilyl 1-thio-β-D-galactopyranoside (A)

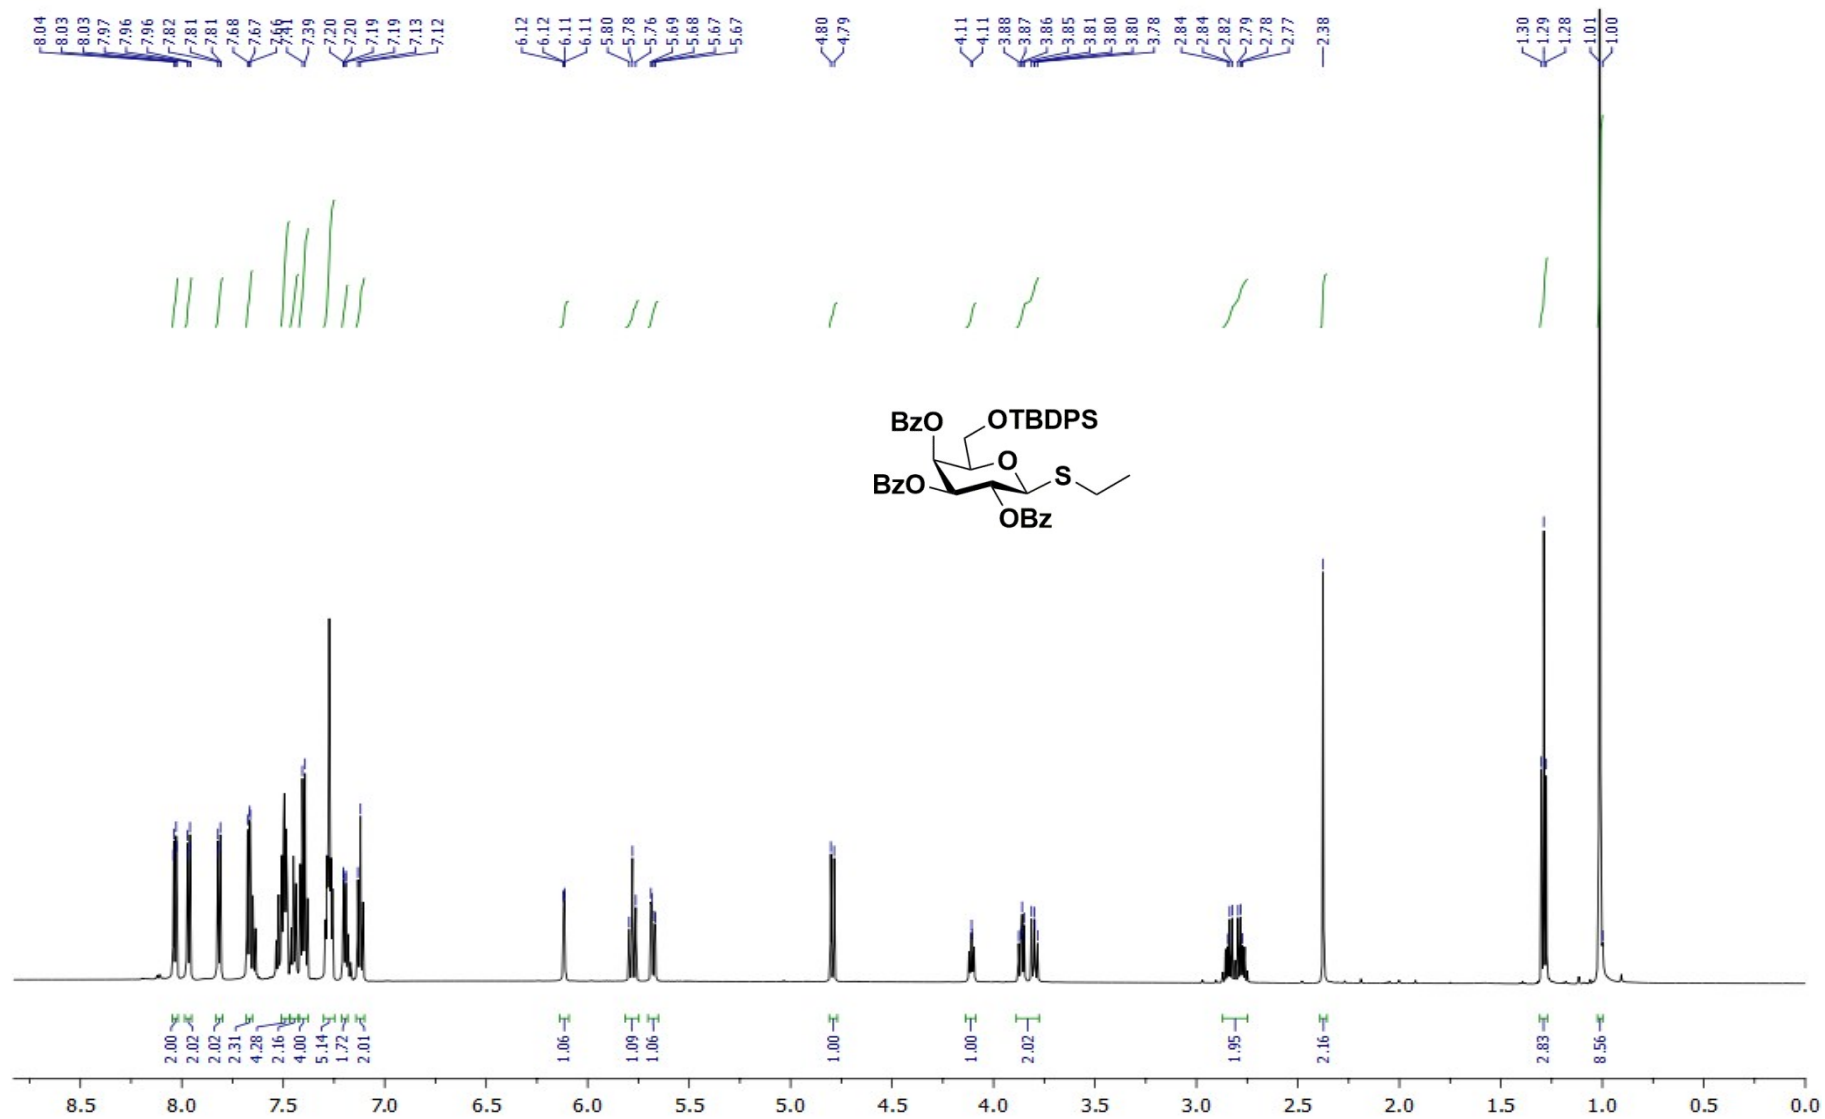

**<sup>13</sup>C NMR of Ethyl-2,3,4-tri-*O*-benzoyl-6-*O*-*t*-butyldiphenylsilyl 1-thio-β-D-galactopyranoside (A)**

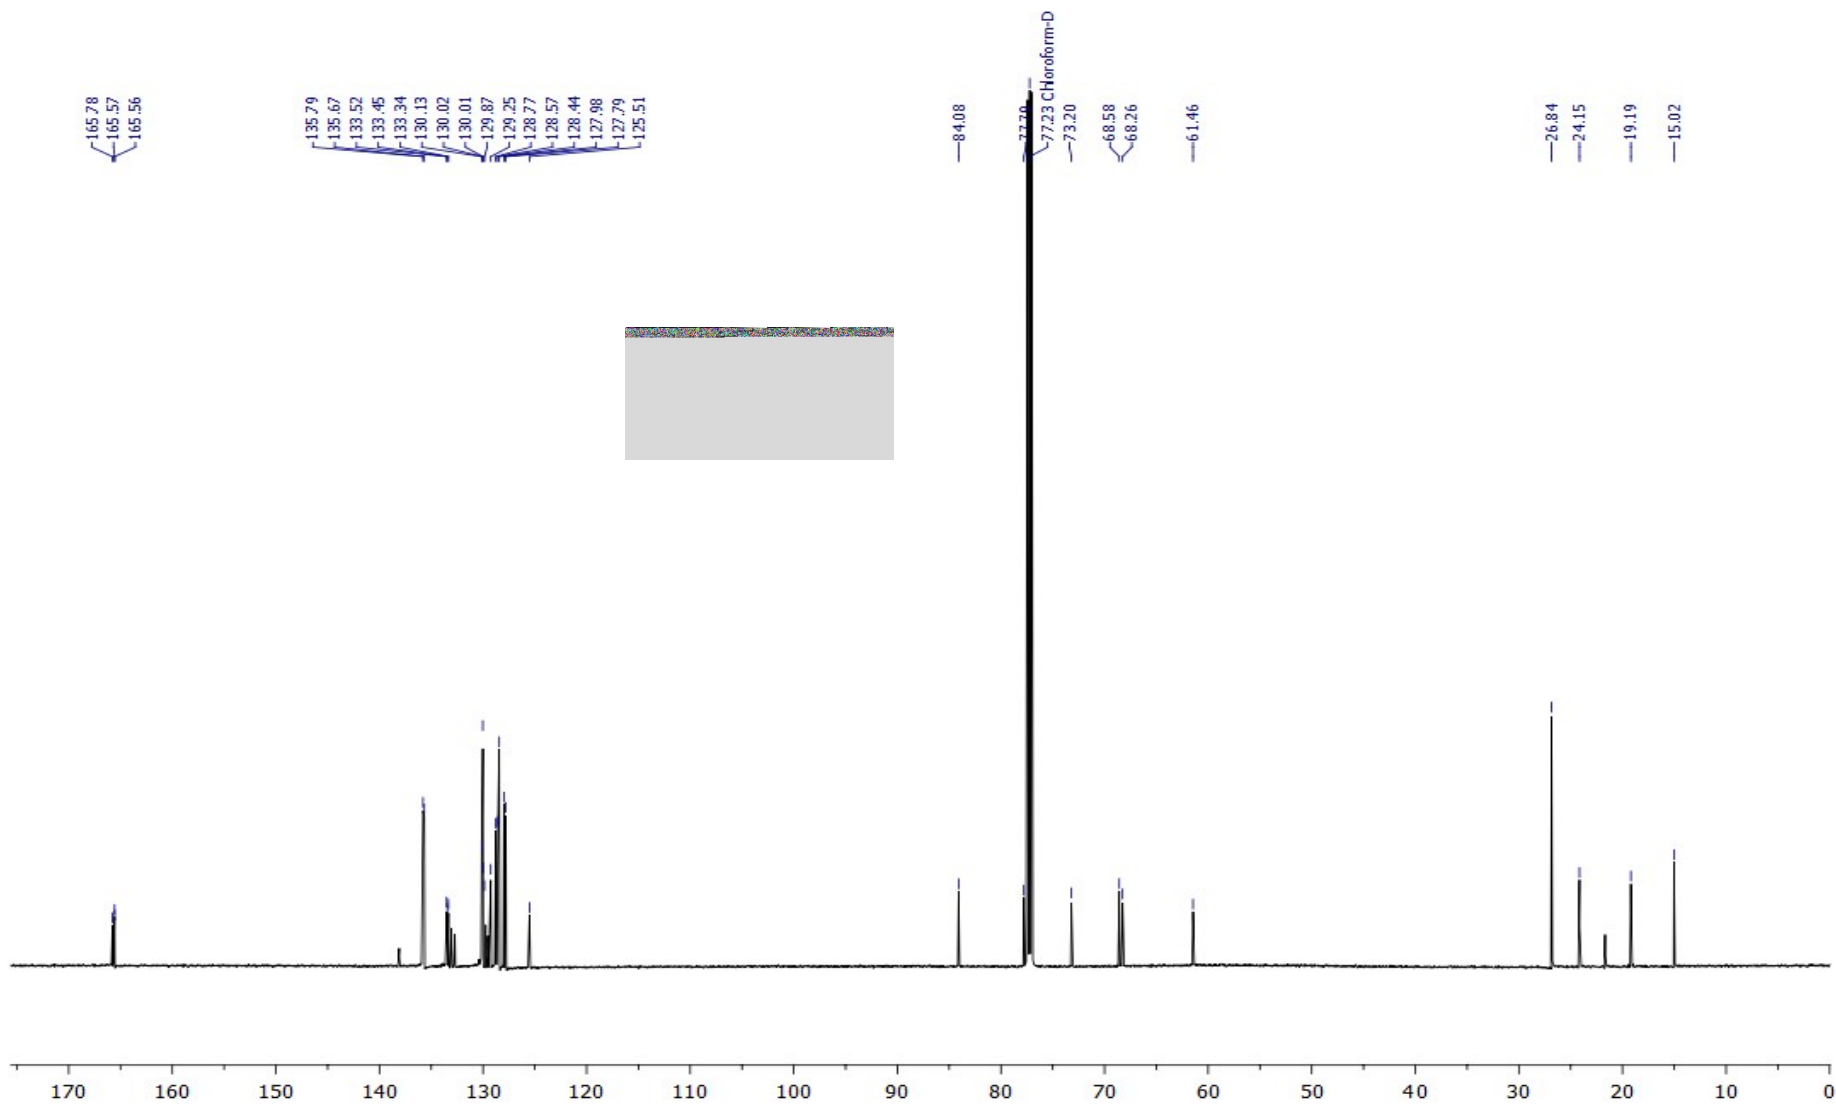

HRMS data of *t*-butyl 4-((4-((*t*-butyldiphenylsilyl)oxy)phenoxy)methyl)-3-nitrobenzoate (3)

KR\_ABHISHEK\_AV4447\_7262018\_3 109 (1.870) AM (Cen,4, 80.00, Ar,8000.0,556.28,0.70)

TOF MS ES+  
1.43e3

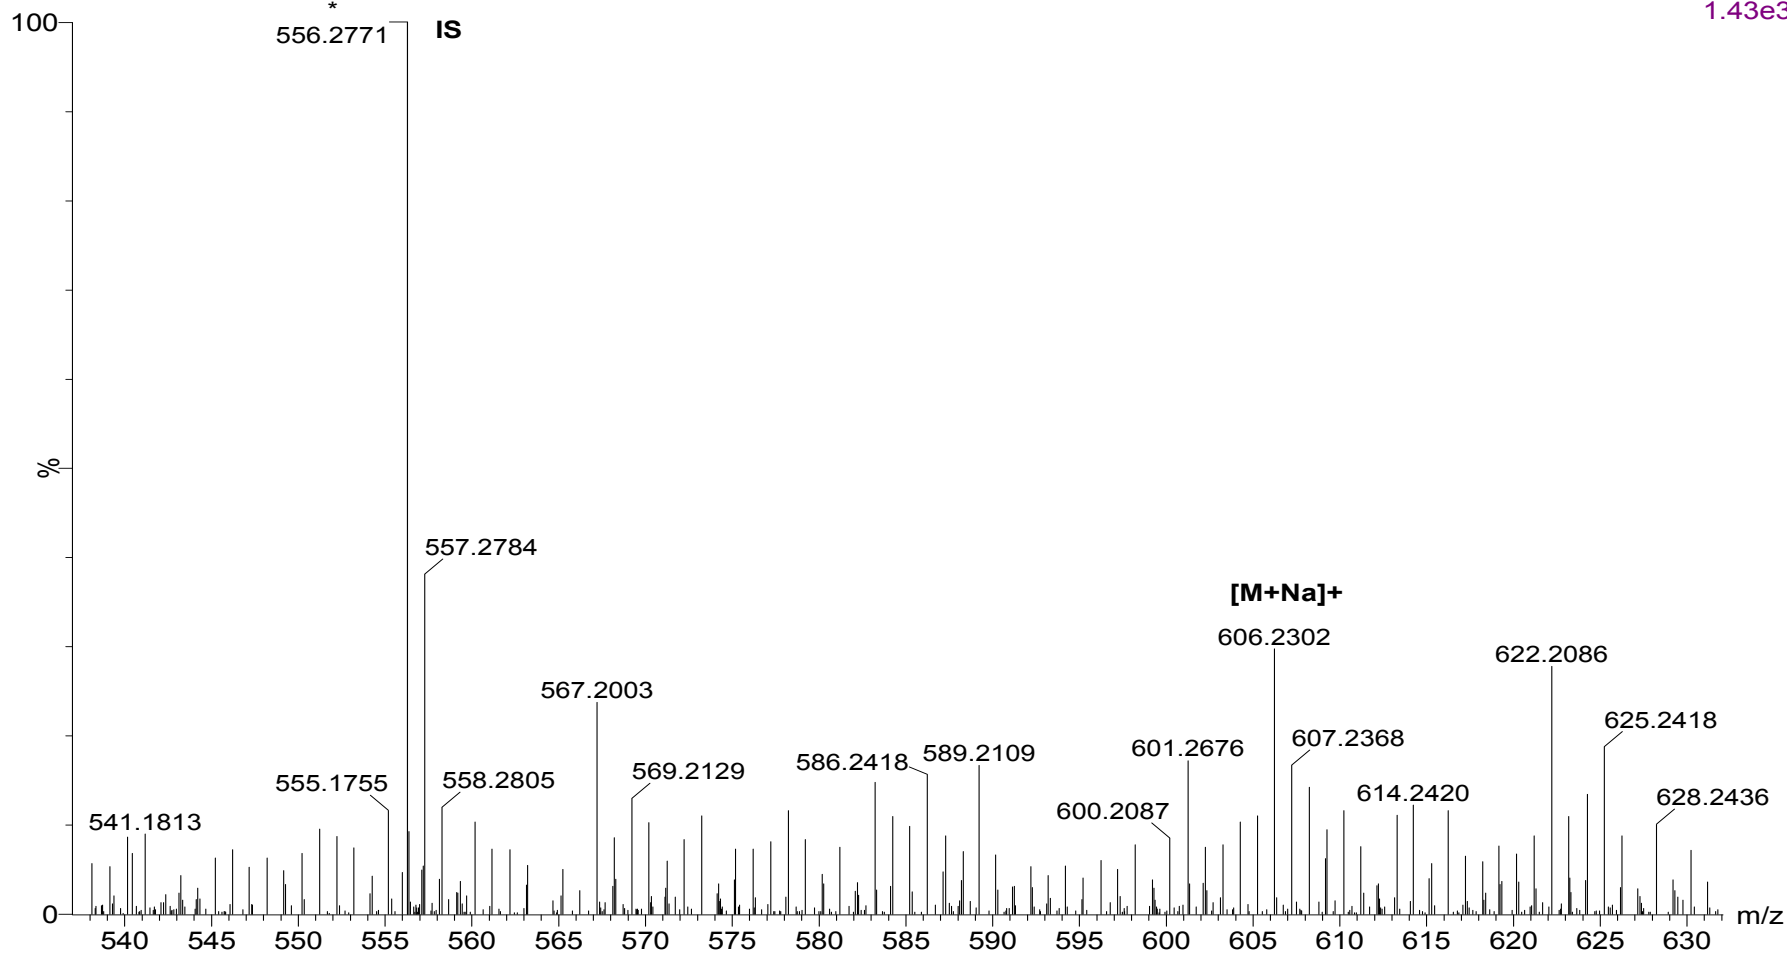

$$\text{Mass accuracy} = ((606.2288 - 606.2302) / 606.2288) * 106 = 2.3 \text{ ppm}$$

<sup>1</sup>H NMR of *t*-butyl 4-((4-((*t*-butyldiphenylsilyl)oxy)phenoxy)methyl)-3-nitrobenzoate (3)

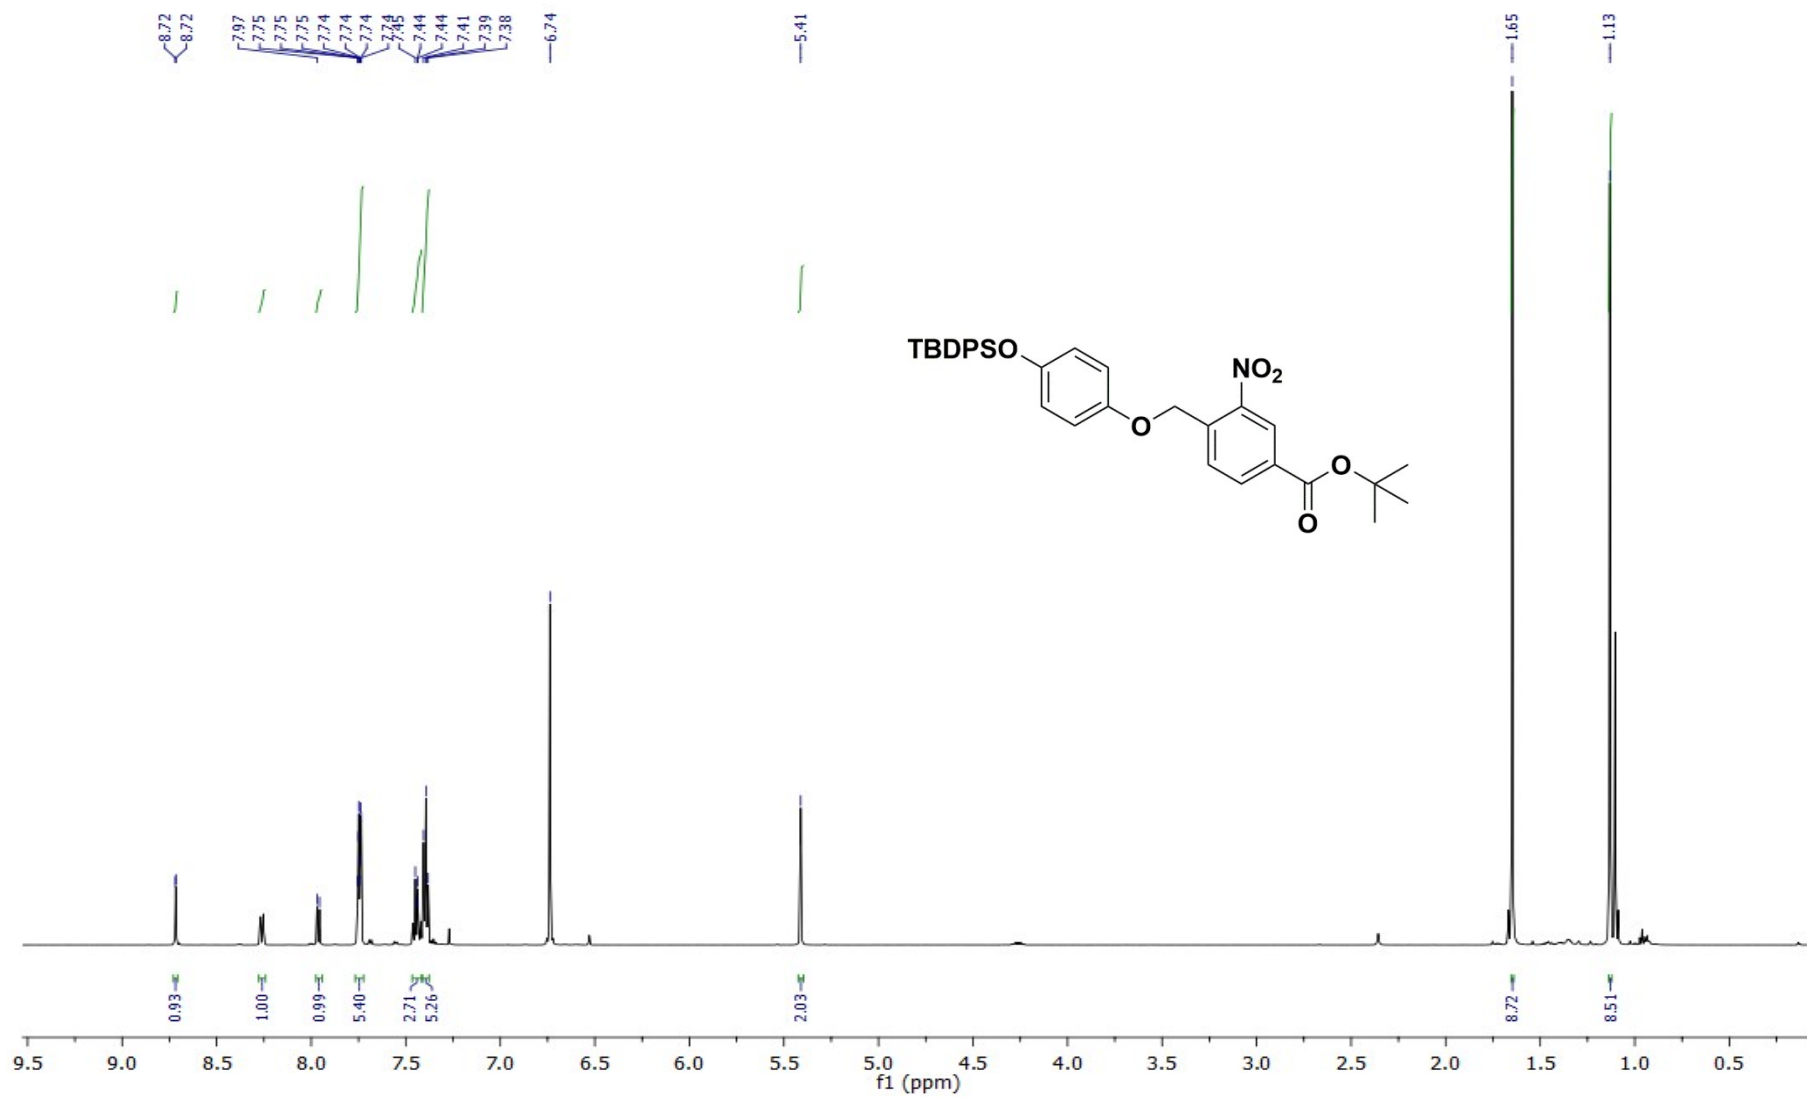



<sup>13</sup>C NMR of *t*-butyl 4-((4-((*t*-butyldiphenylsilyl)oxy)phenoxy)methyl)-3-nitrobenzoate (3)

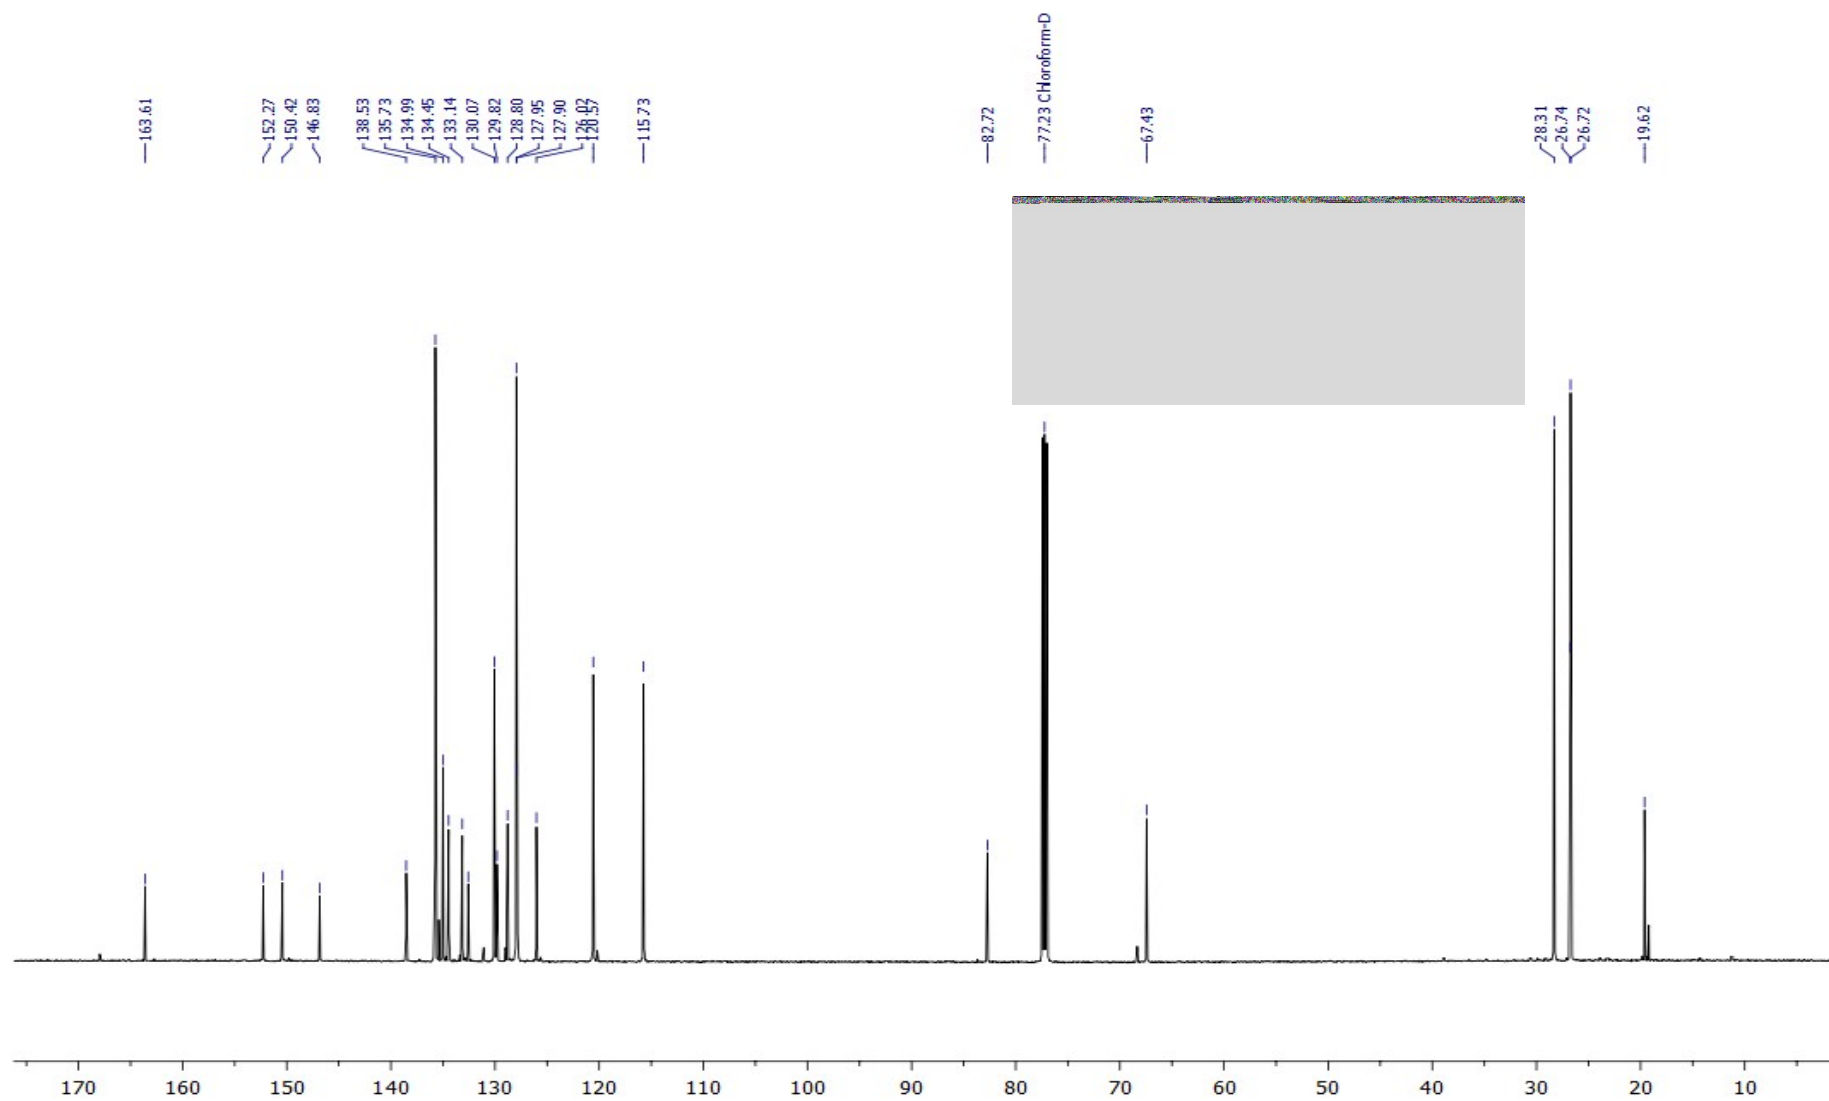

HRMS data of *t*-butyl 4-((4-hydroxyphenoxy)methyl)-3-nitrobenzoate (4)

KR\_ABHISHEK\_AV4433\_5112018\_2 194 (3.315) AM (Cen,4, 80.00, Ar,8000.0,556.28,0.70); Cm (191:199)

TOF MS ES+  
2.33e4

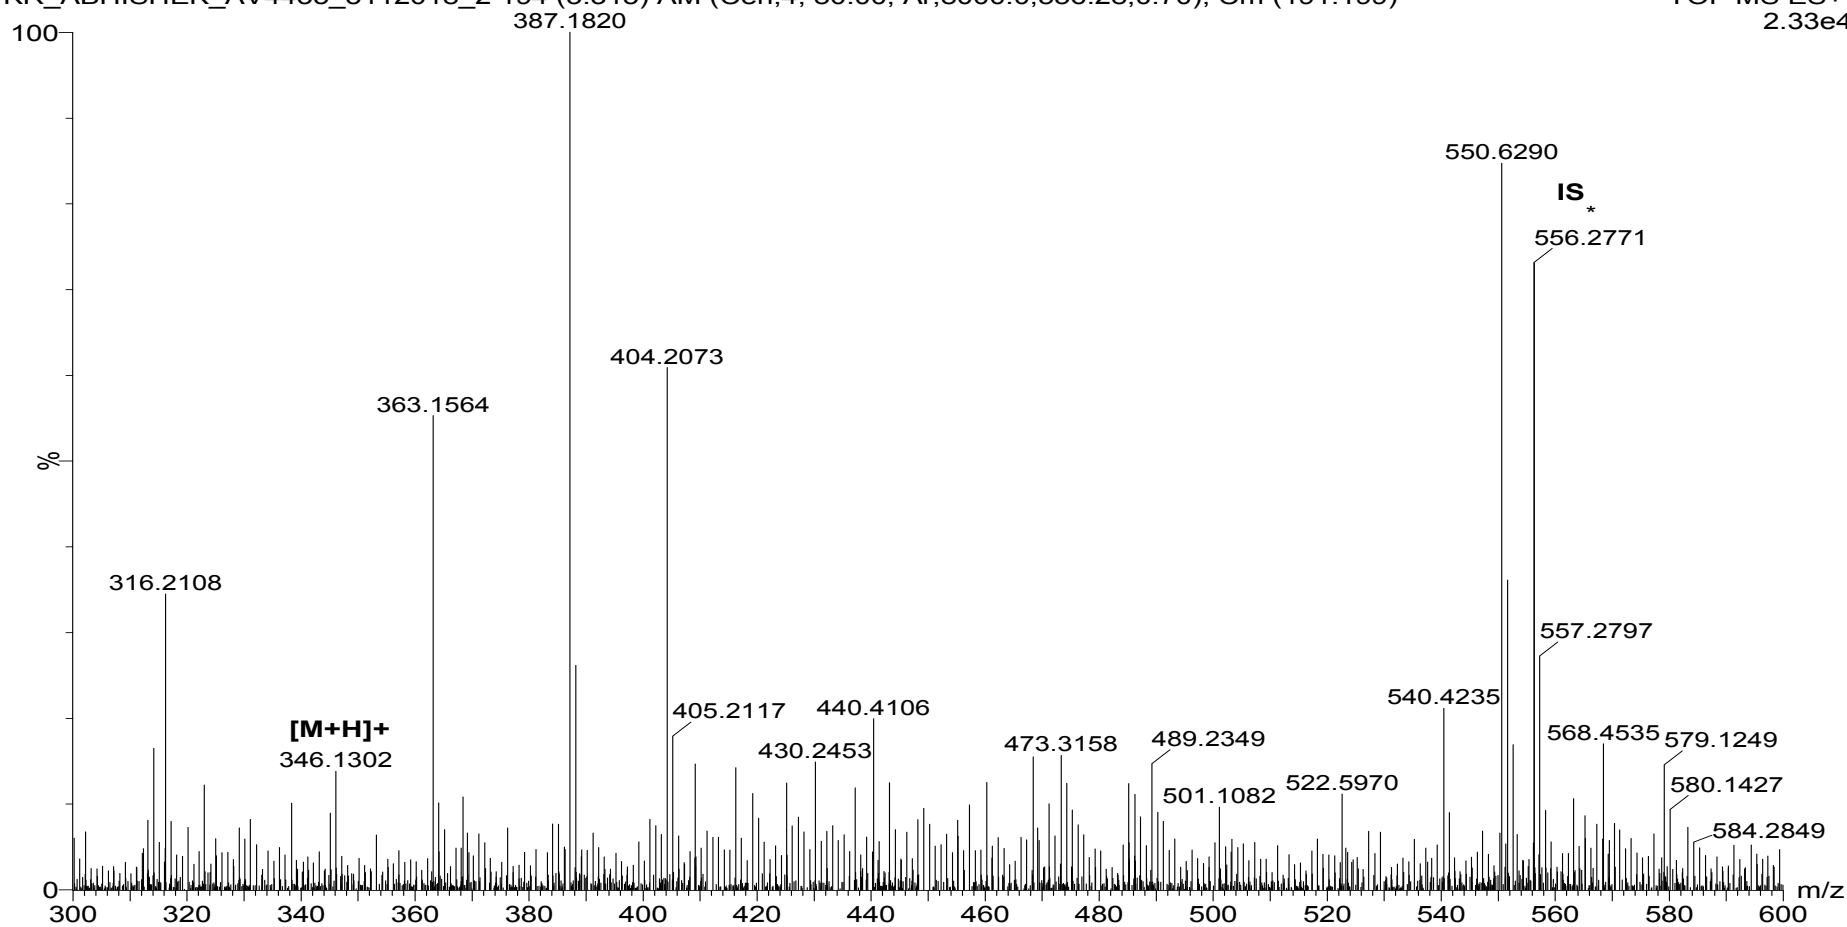

$$\text{Mass accuracy} = ((346.1291 - 346.1302) / 346.1291) * 106 = 3.2 \text{ ppm}$$

<sup>1</sup>H NMR of *t*-butyl 4-((4-hydroxyphenoxy)methyl)-3-nitrobenzoate (4)

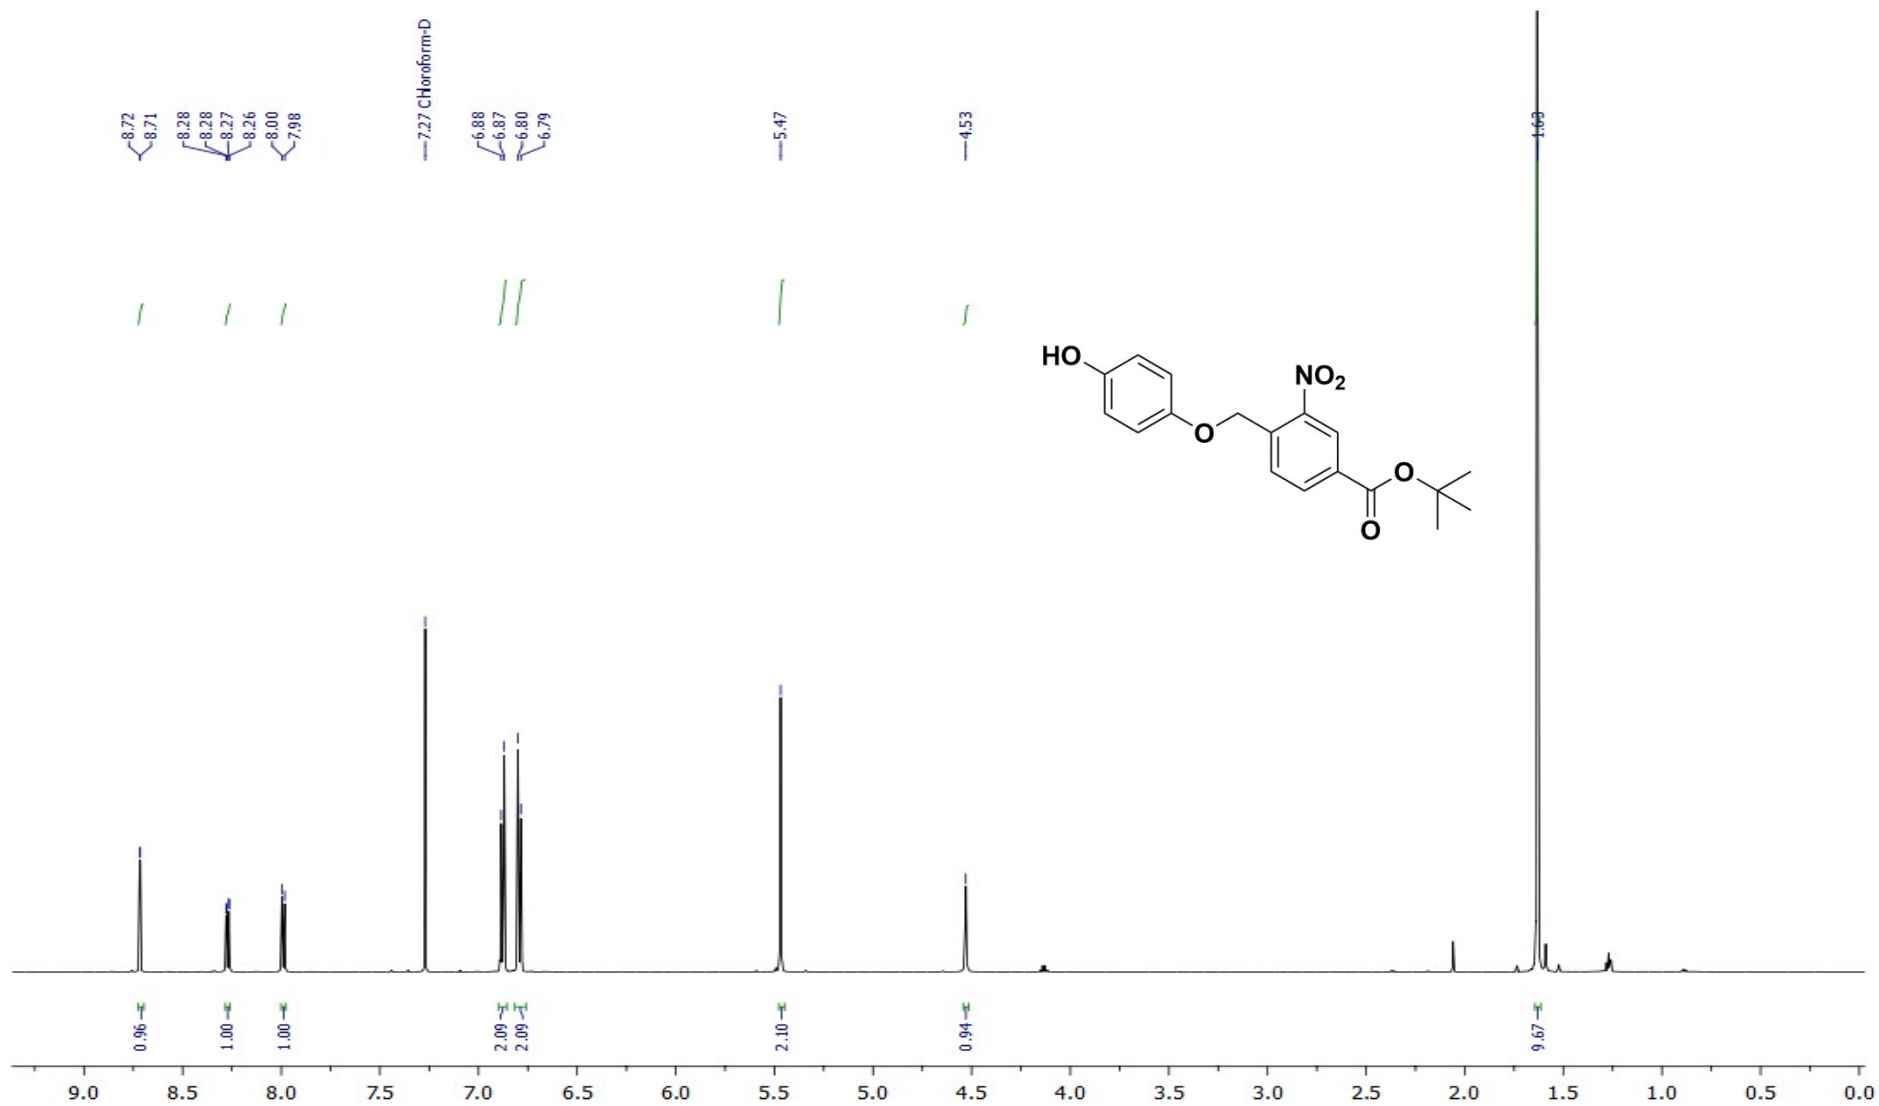

<sup>13</sup>C NMR of *t*-butyl 4-((4-hydroxyphenoxy)methyl)-3-nitrobenzoate (4)

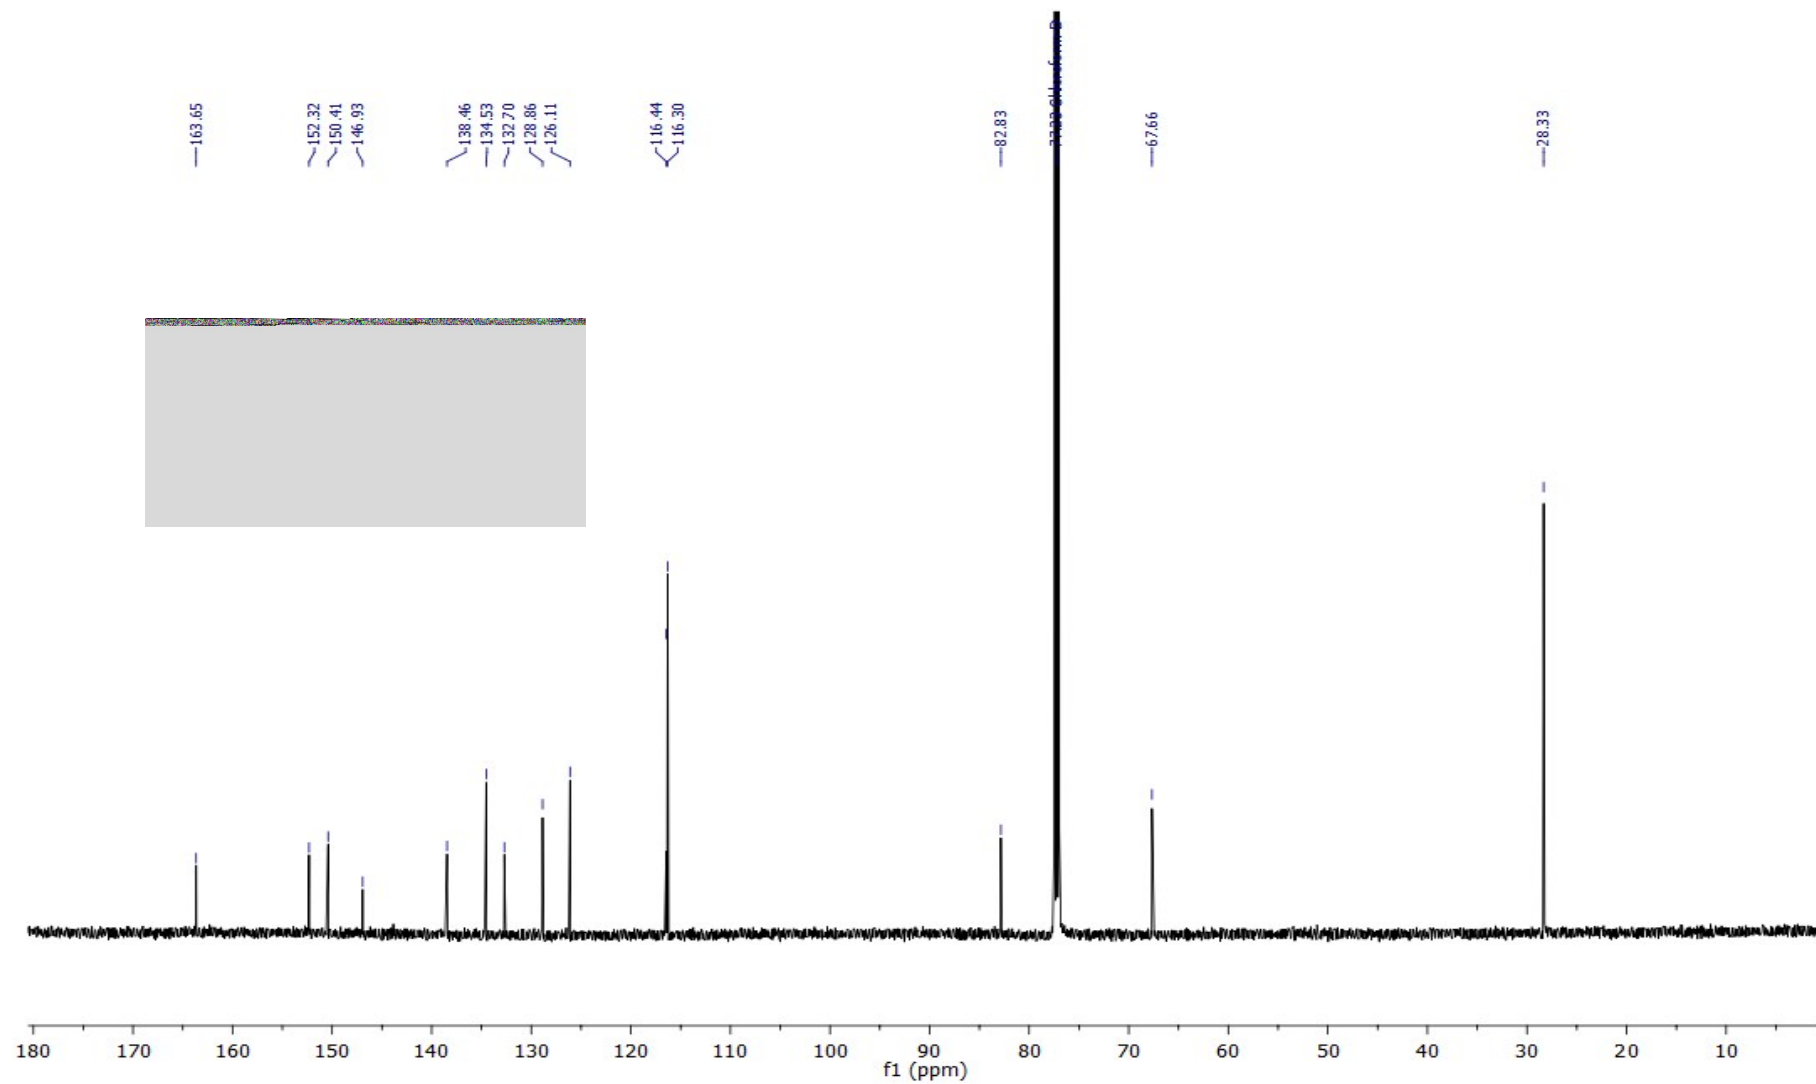

ESI-MS data of 4-((4-(*t*-butoxycarbonyl)-2-nitrobenzyl)oxy)phenyl-2,3,4-tri-*O*-benzoyl-6-*O*-*t*-butyldiphenylsilyl  $\beta$ -D-galactopyranoside (5)

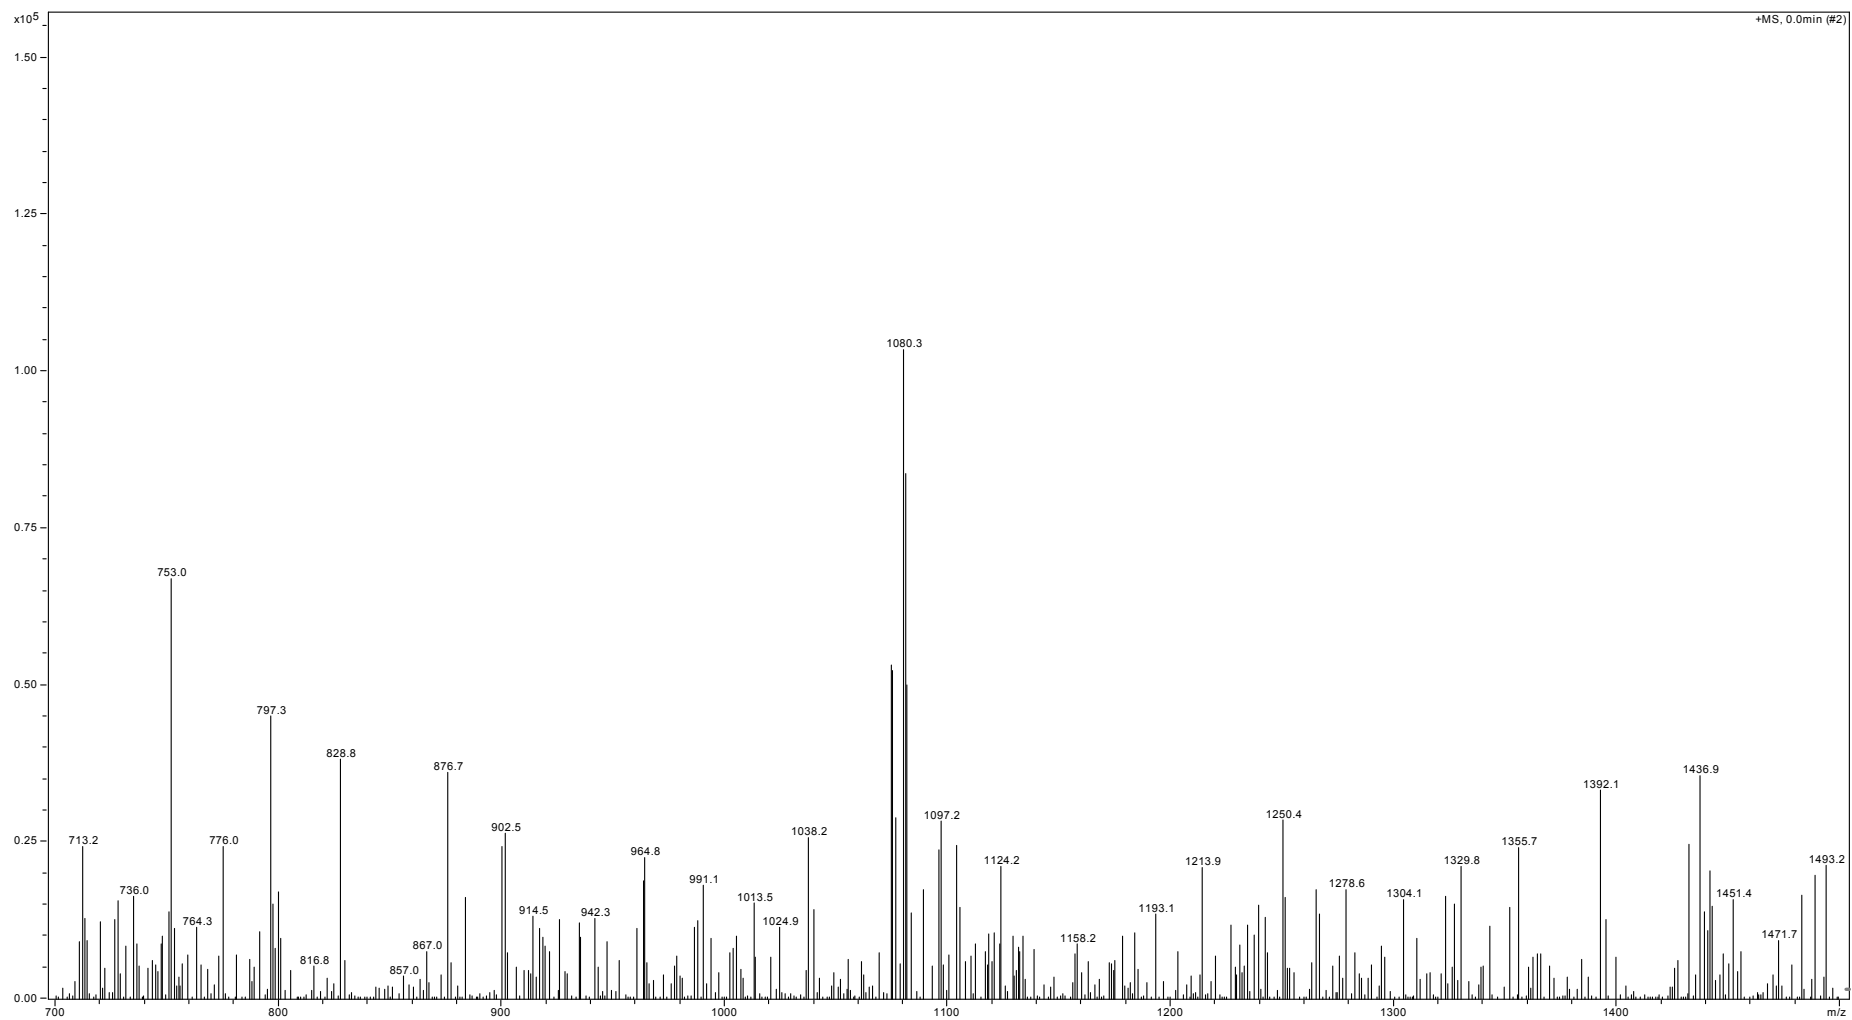

<sup>1</sup>H NMR of 4-((4-(*t*-butoxycarbonyl)-2-nitrobenzyl)oxy)phenyl-2,3,4-tri-*O*-benzoyl-6-*O*-*t*-butyldiphenylsilyl β-D-galactopyranoside (5)

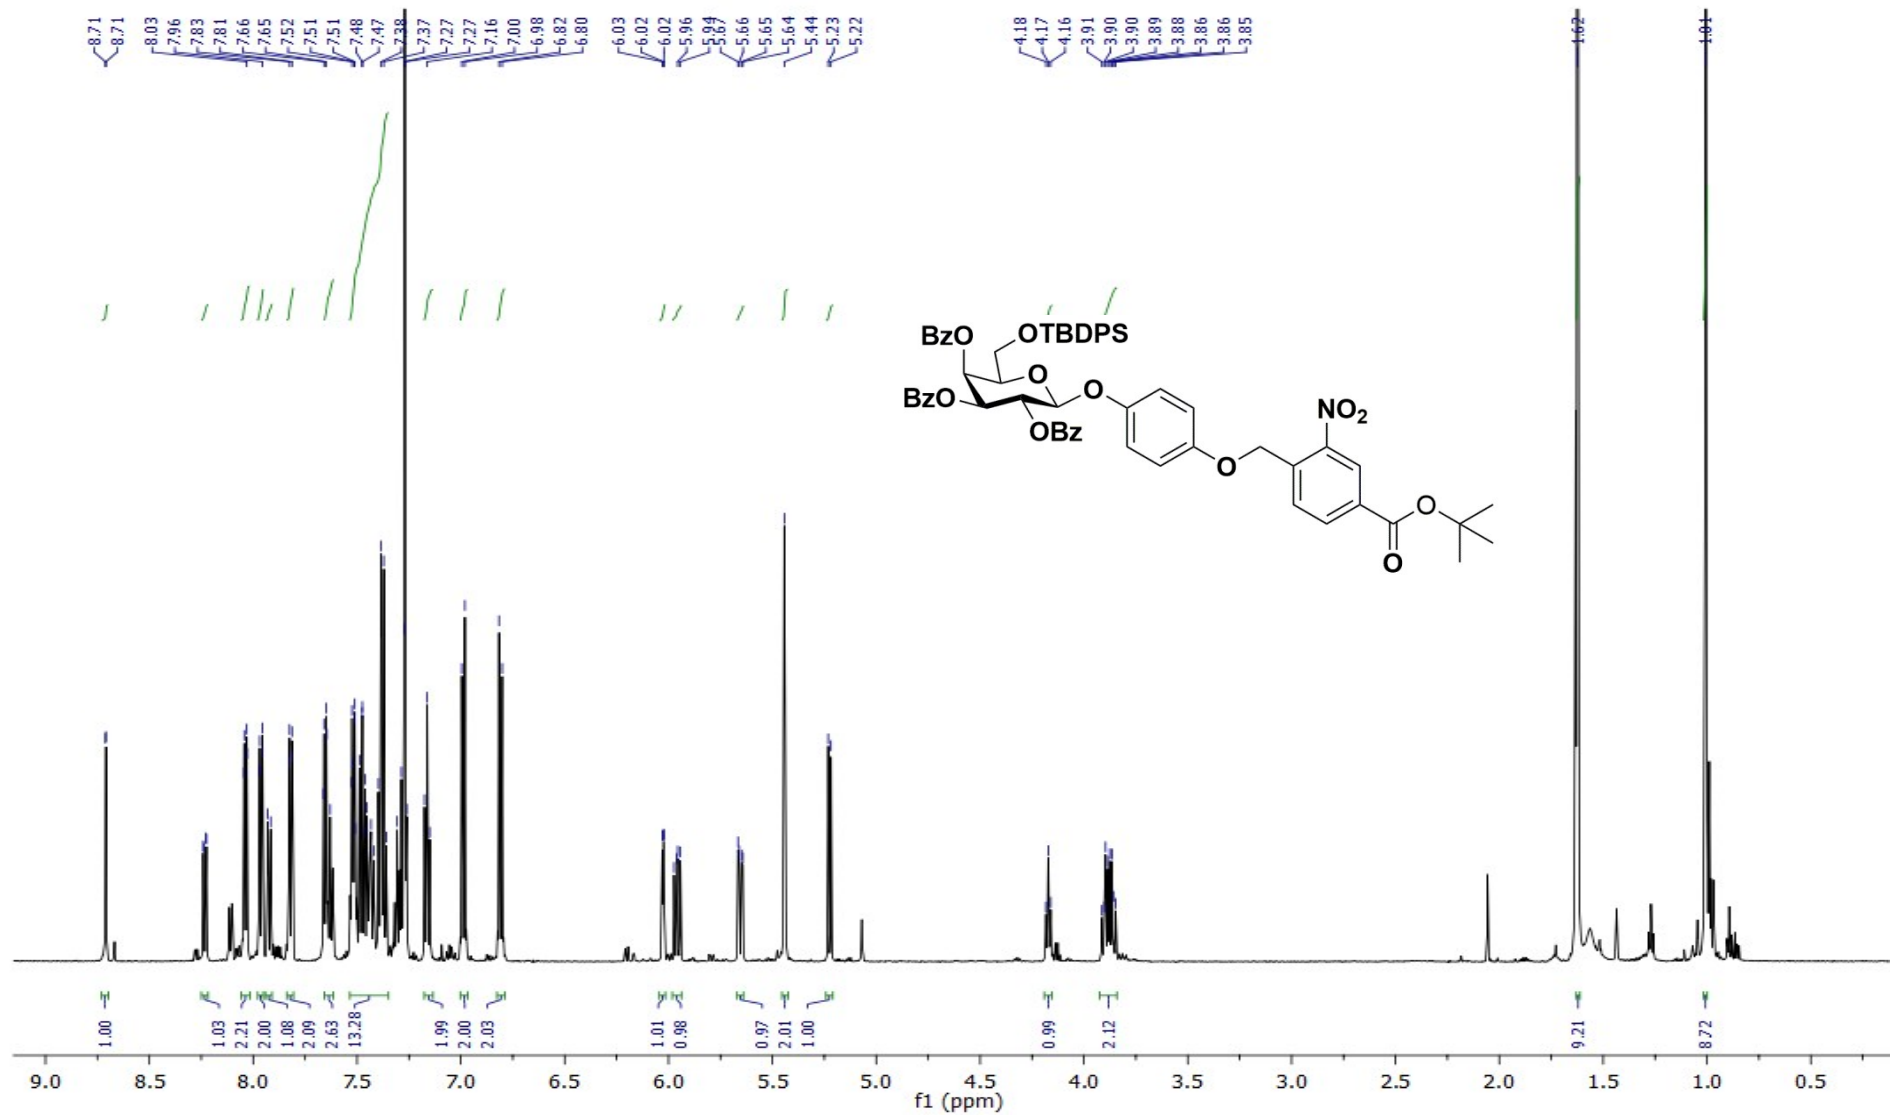

<sup>13</sup>C NMR of 4-((4-(*t*-butoxycarbonyl)-2-nitrobenzyl)oxy)phenyl-2,3,4-tri-*O*-benzoyl-6-*O*-*t*-butyldiphenylsilyl β-D-galactopyranoside (5)

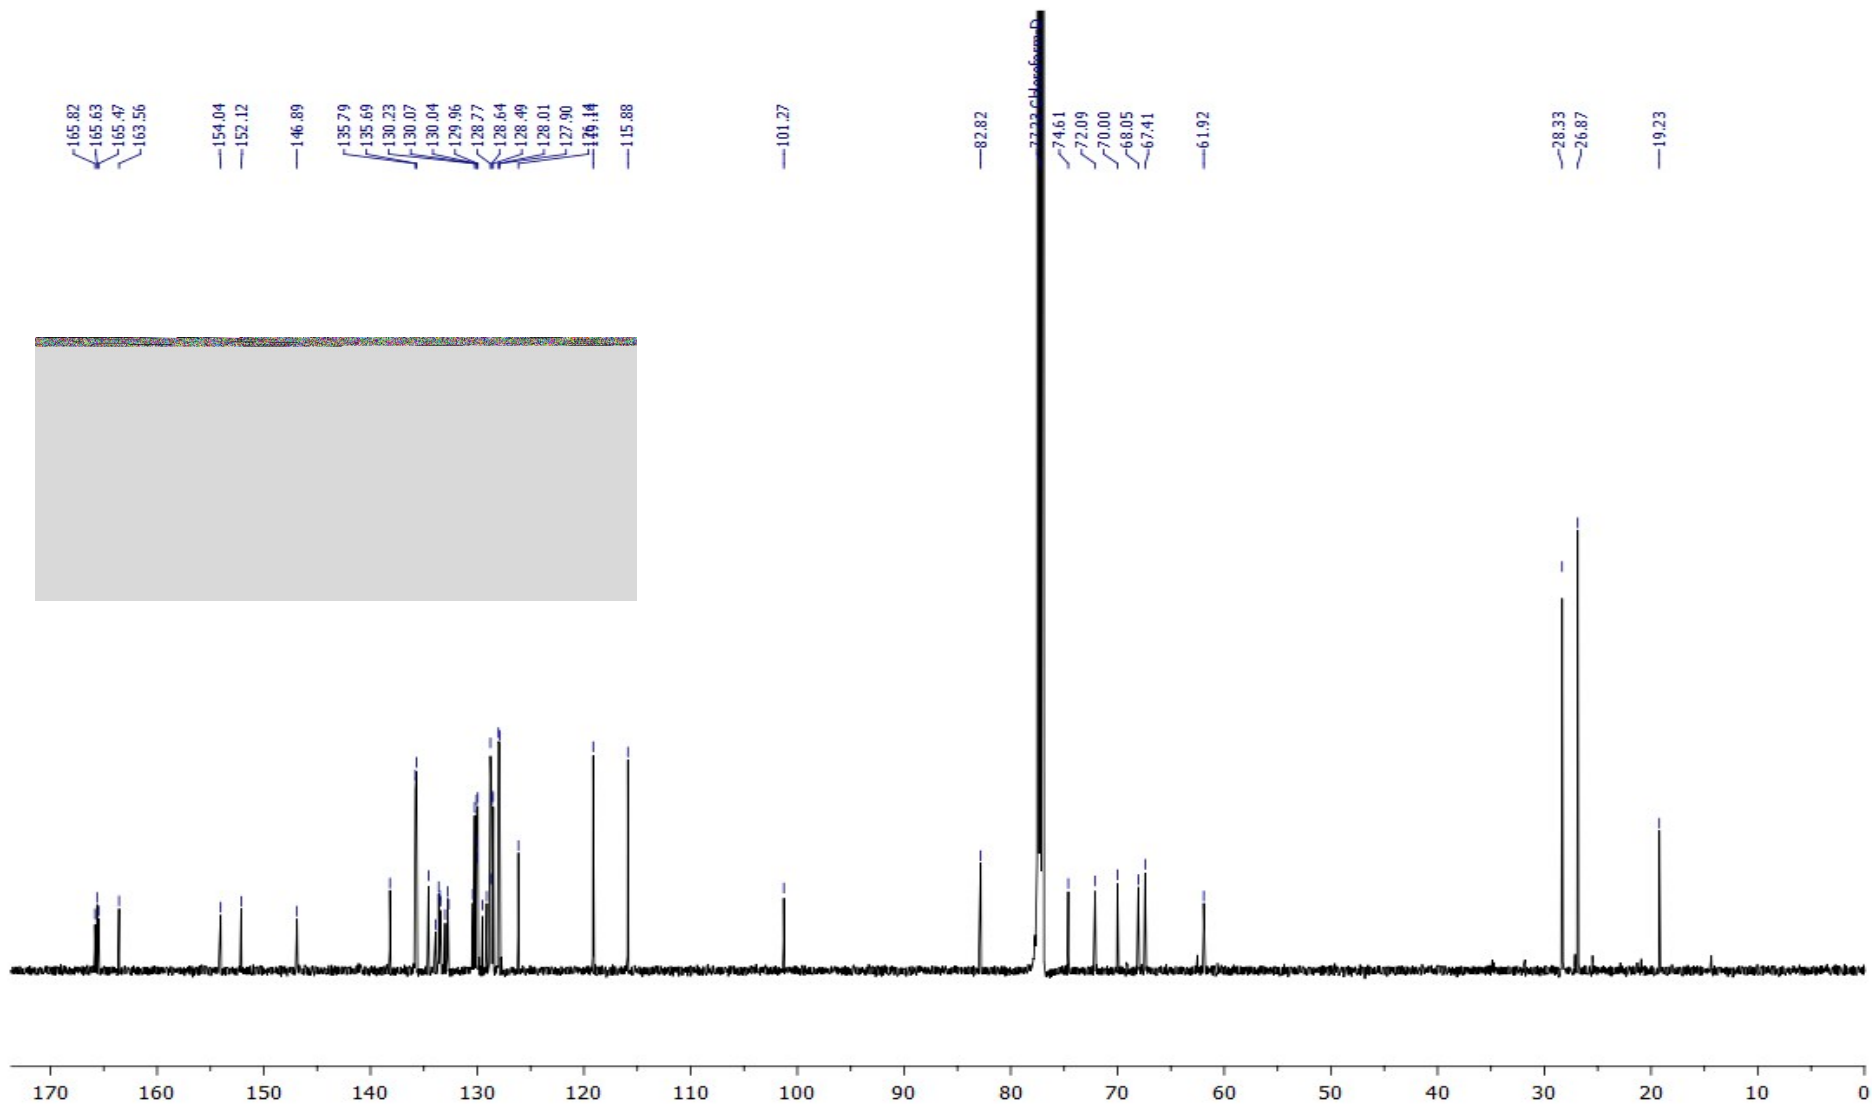

HRMS data of 4-((4-carboxylate-2-nitrobenzyl)oxy)phenyl-2,3,4-tri-*O*-benzoyl-6-*O*-*t*-butyldiphenylsilyl  $\beta$ -D-galactopyranoside (6)

KR\_ABHISHEK\_AV4474\_7262018\_NEG 128 (2.193) AM (Cen,4, 80.00, Ar,8000.0,554.26,0.70); Cm (124:130)

TOF MS ES-  
3.30e3

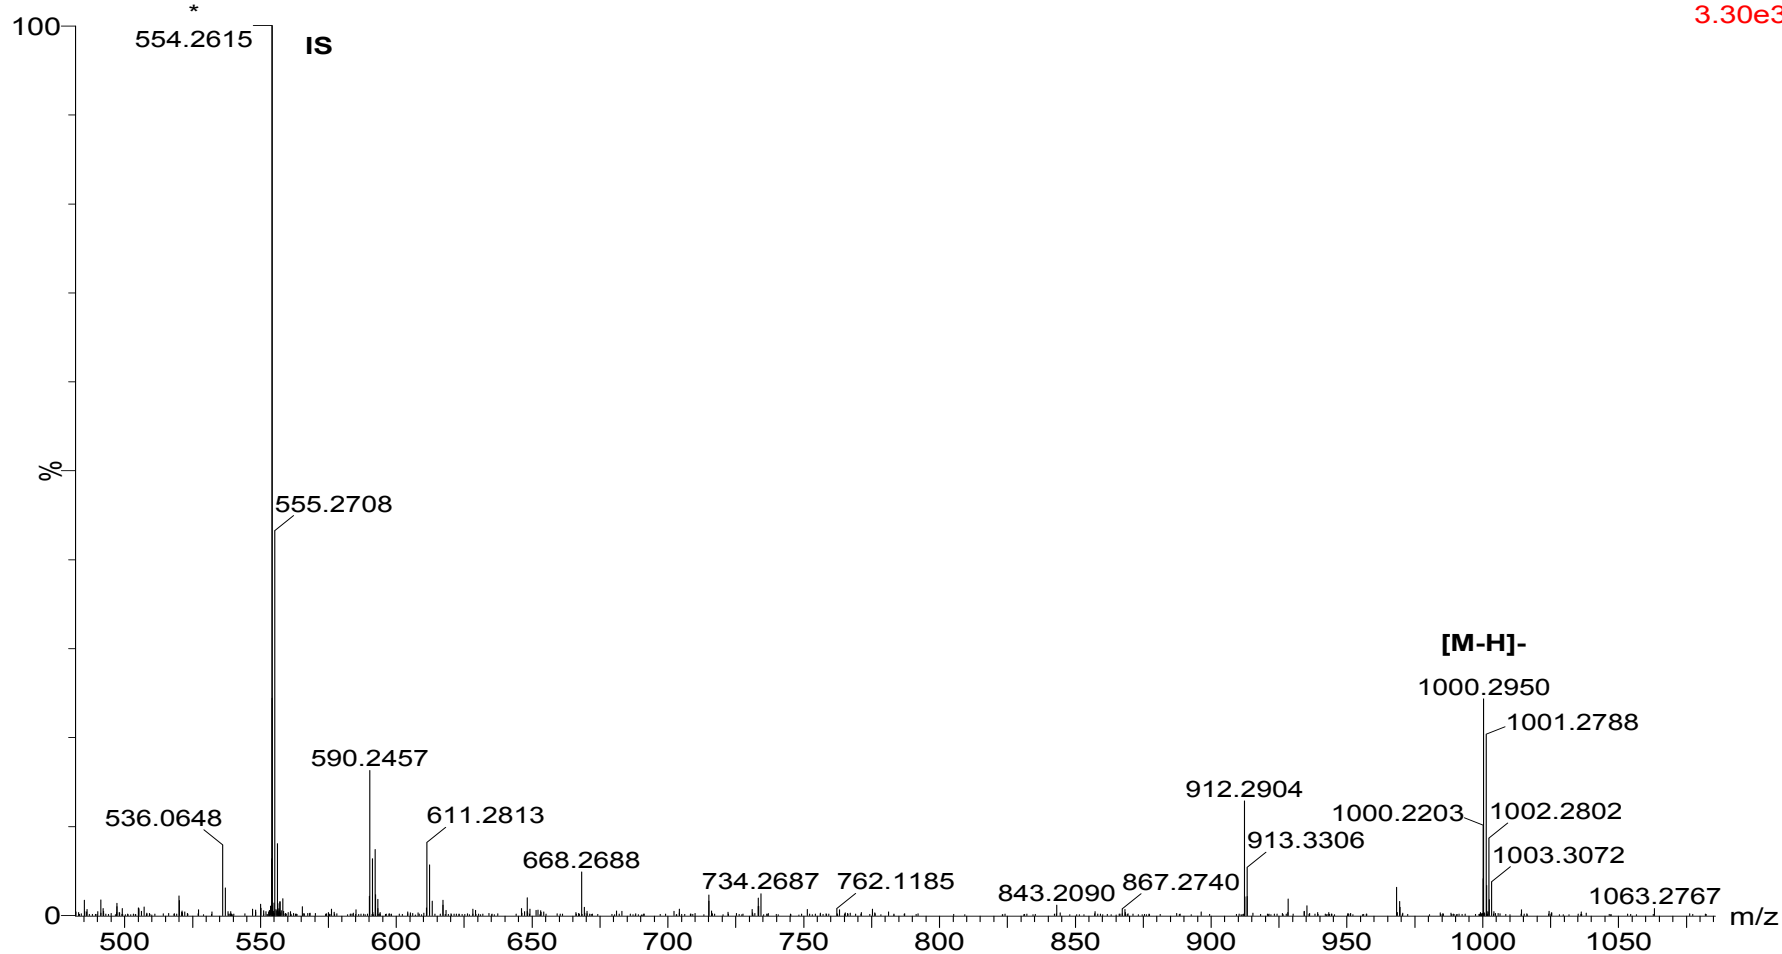

$$\text{Mass accuracy} = ((1000.3000 - 1000.2950) / 1000.3000) * 106 = 5.0 \text{ ppm}$$



<sup>1</sup>H NMR of 4-((4-carboxylate-2-nitrobenzyl)oxy)phenyl-2,3,4-tri-*O*-benzoyl-6-*O*-*t*-butyldiphenylsilyl β-D-galactopyranoside (6)

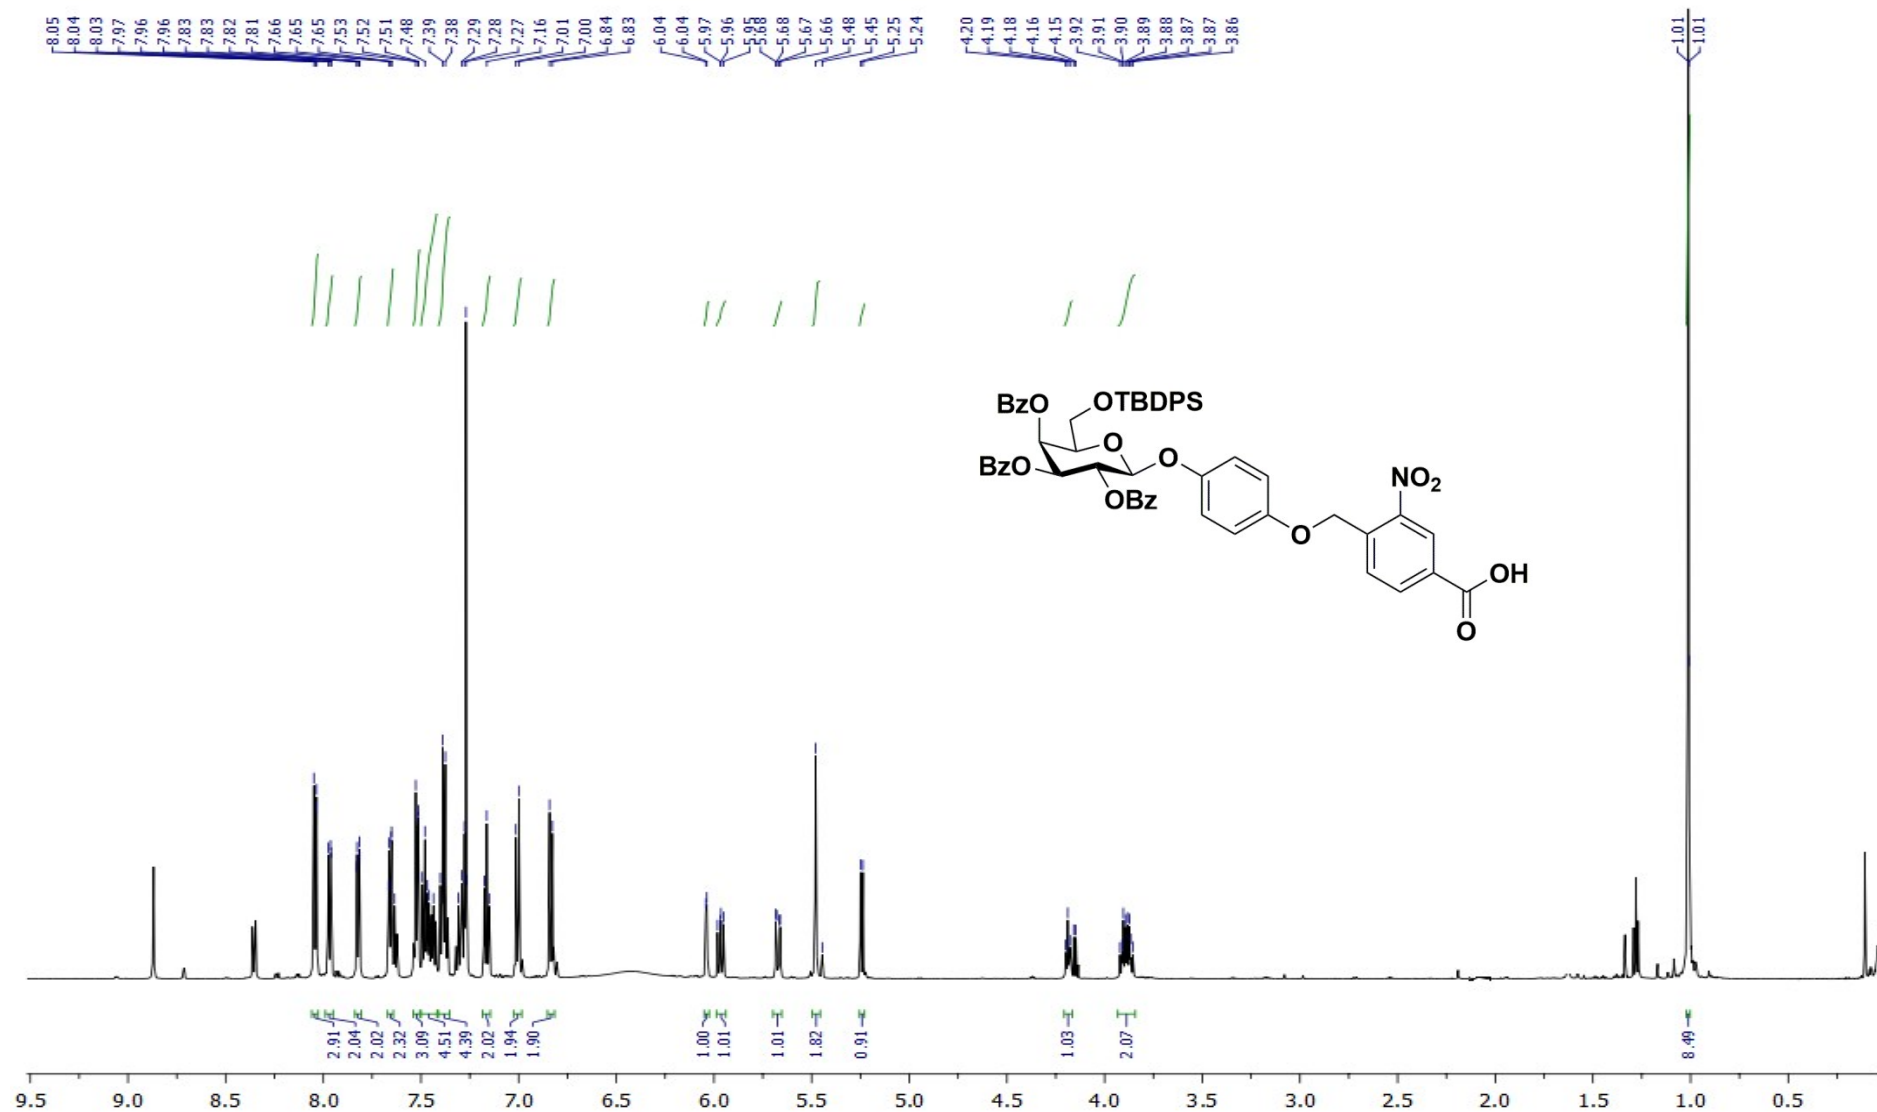

<sup>13</sup>C NMR of 4-((4-carboxylate-2-nitrobenzyl)oxy)phenyl-2,3,4-tri-*O*-benzoyl-6-*O*-*t*-butyldiphenylsilyl β-D-galactopyranoside (6)

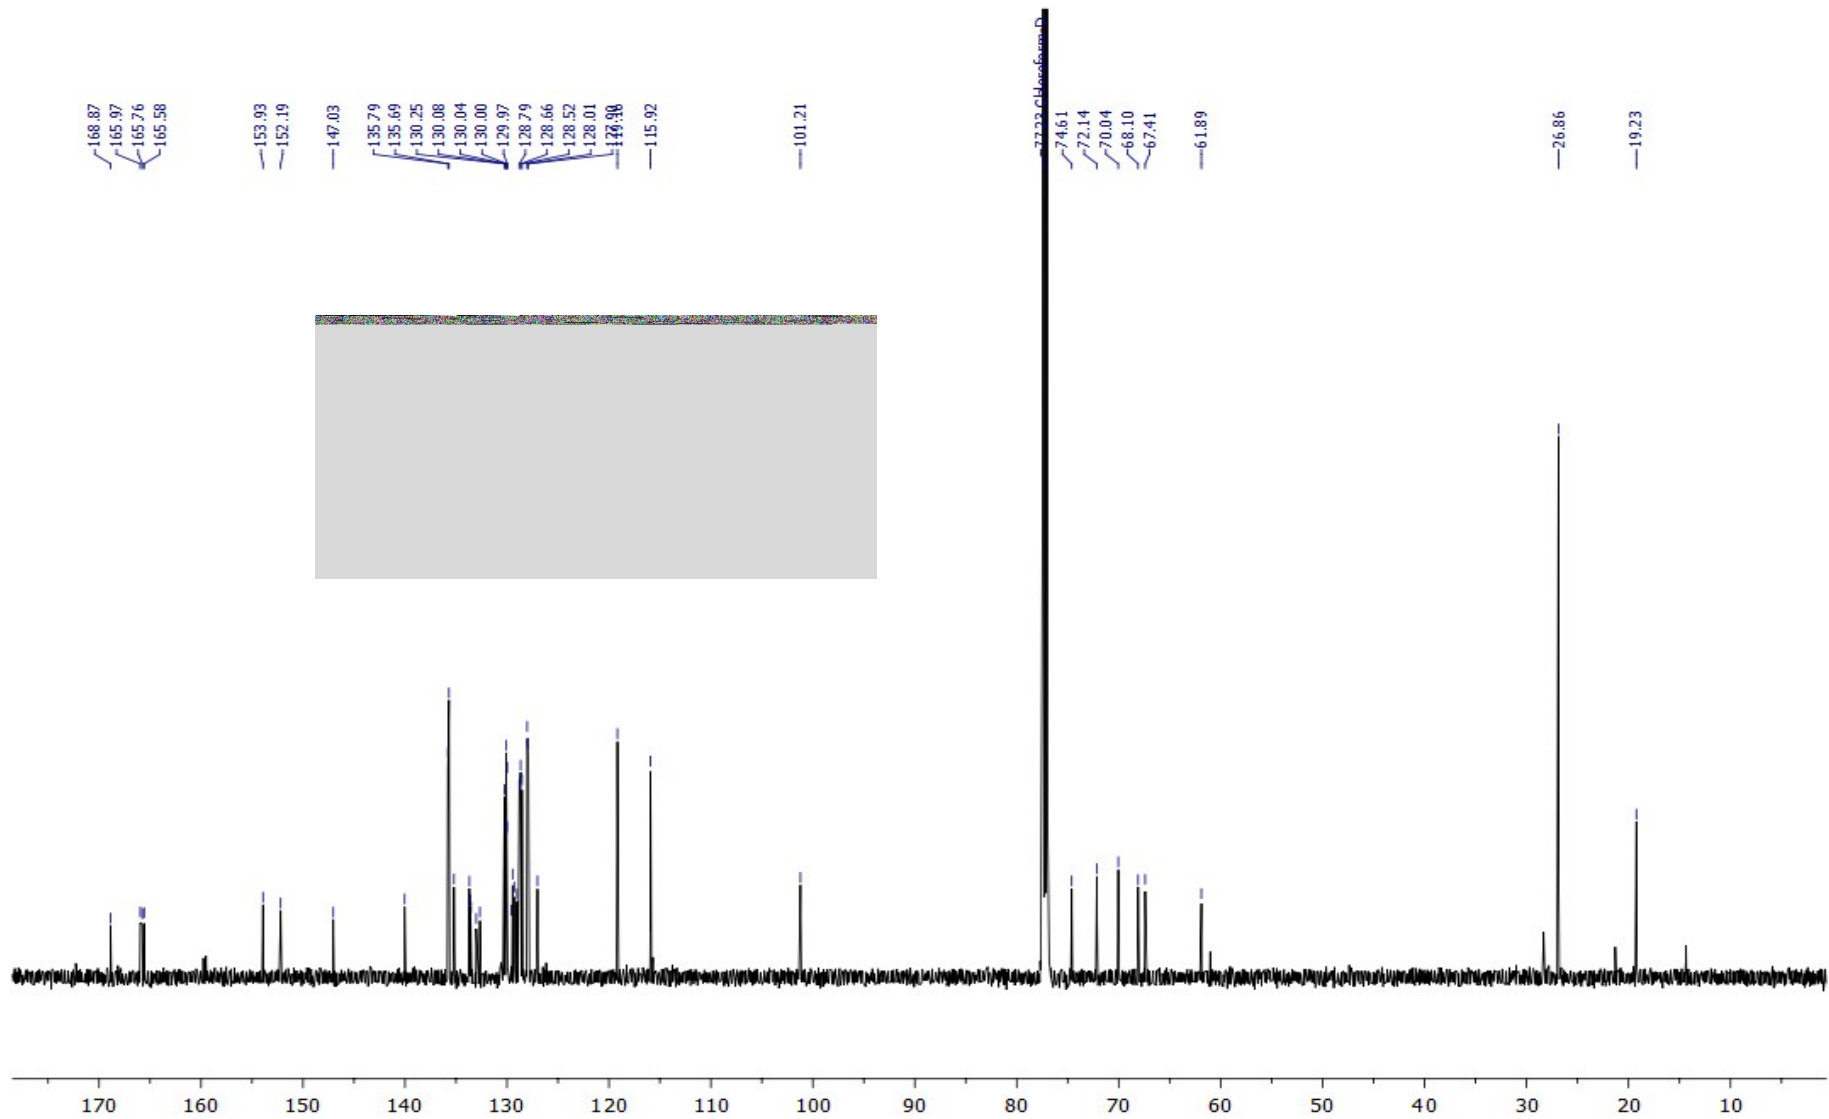

COSY NMR of 4-((4-carboxylate-2-nitrobenzyl)oxy)phenyl-2,3,4-tri-O-benzoyl-6-O-t-butylidiphenylsilyl  $\beta$ -D-galactopyranoside (6)

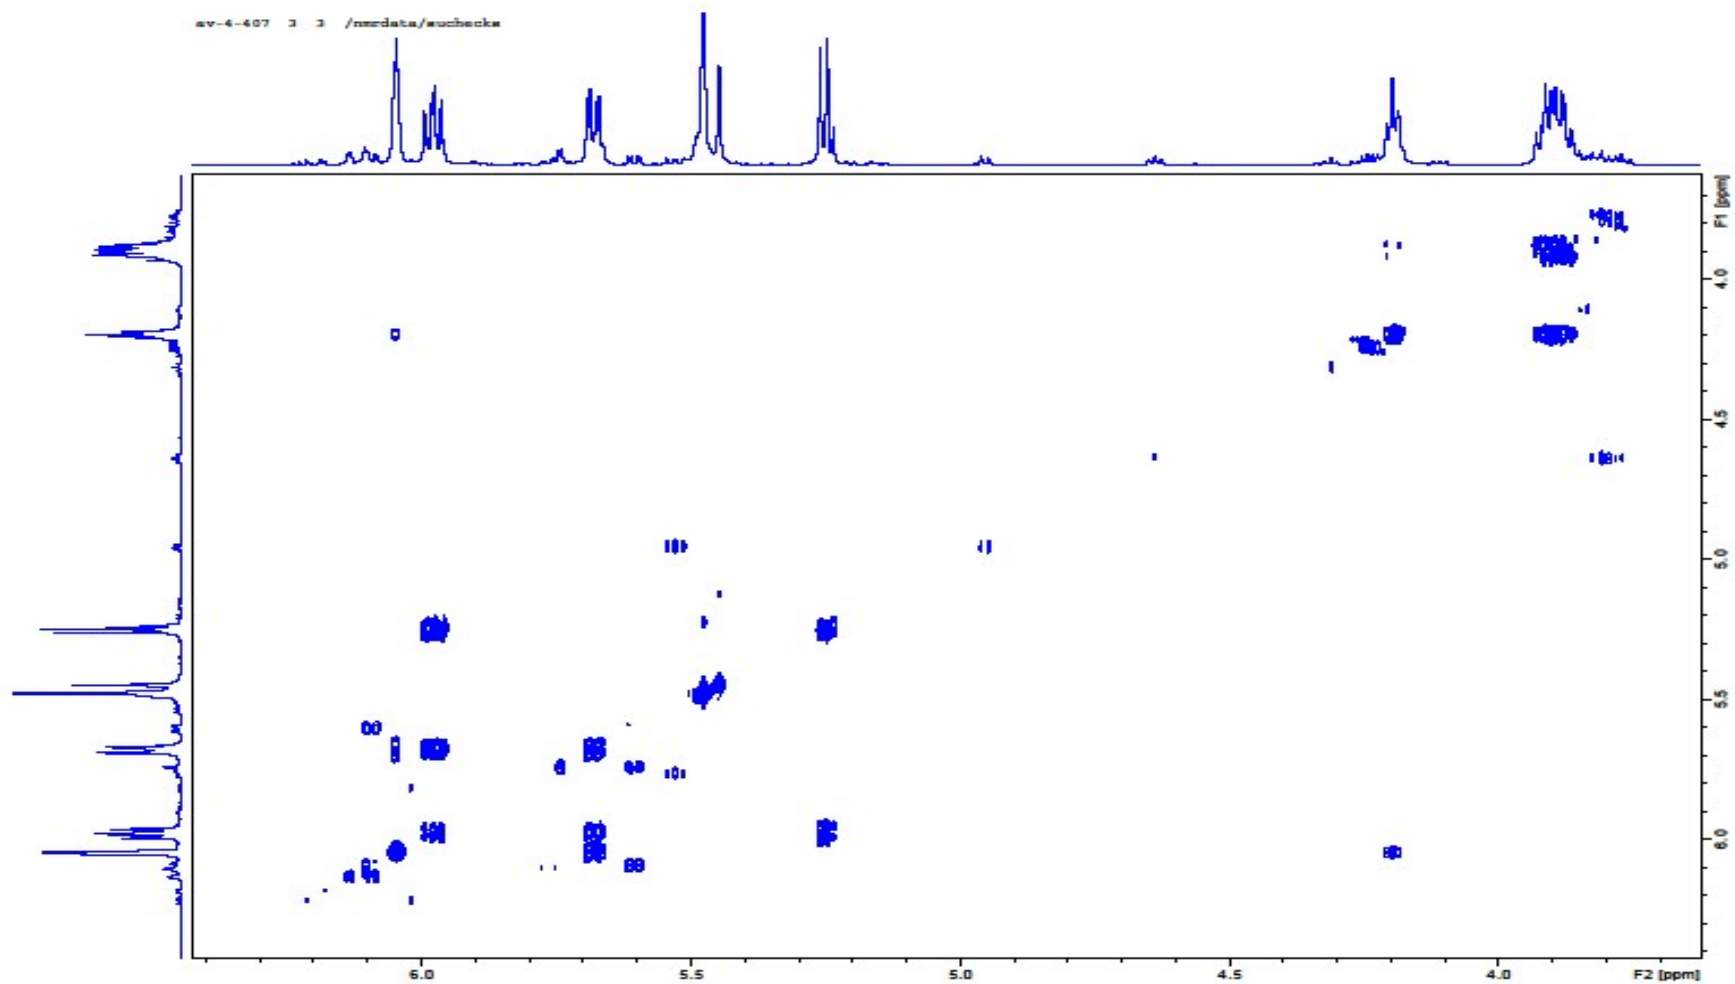

ESI-MS data of 4-hydroxyphenyl-2,3,4-tri-O-benzoyl-6-O-t-butylidiphenylsilyl-β-D-galacopyranoside (7a)

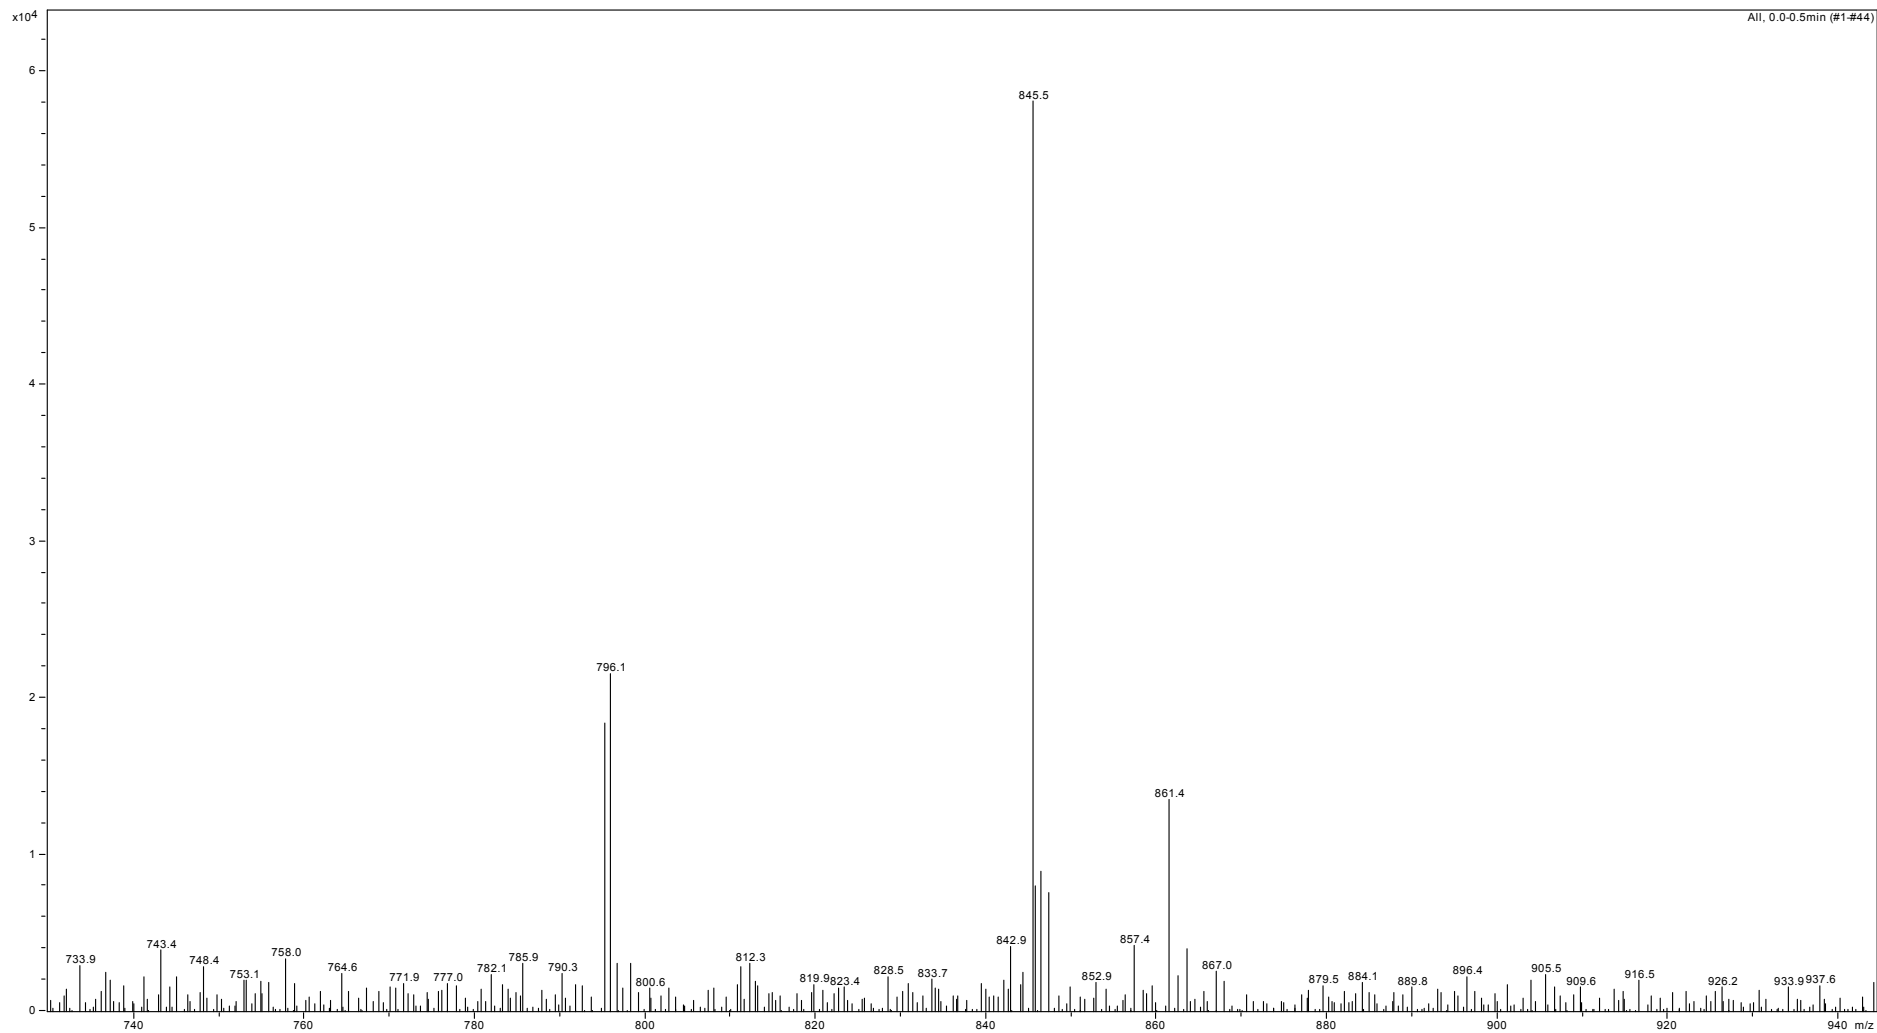

<sup>1</sup>H NMR of 4-hydroxyphenyl-2,3,4-tri-O-benzoyl-6-O-*t*-butyldiphenylsilyl-β-D-galactopyranoside (7a)

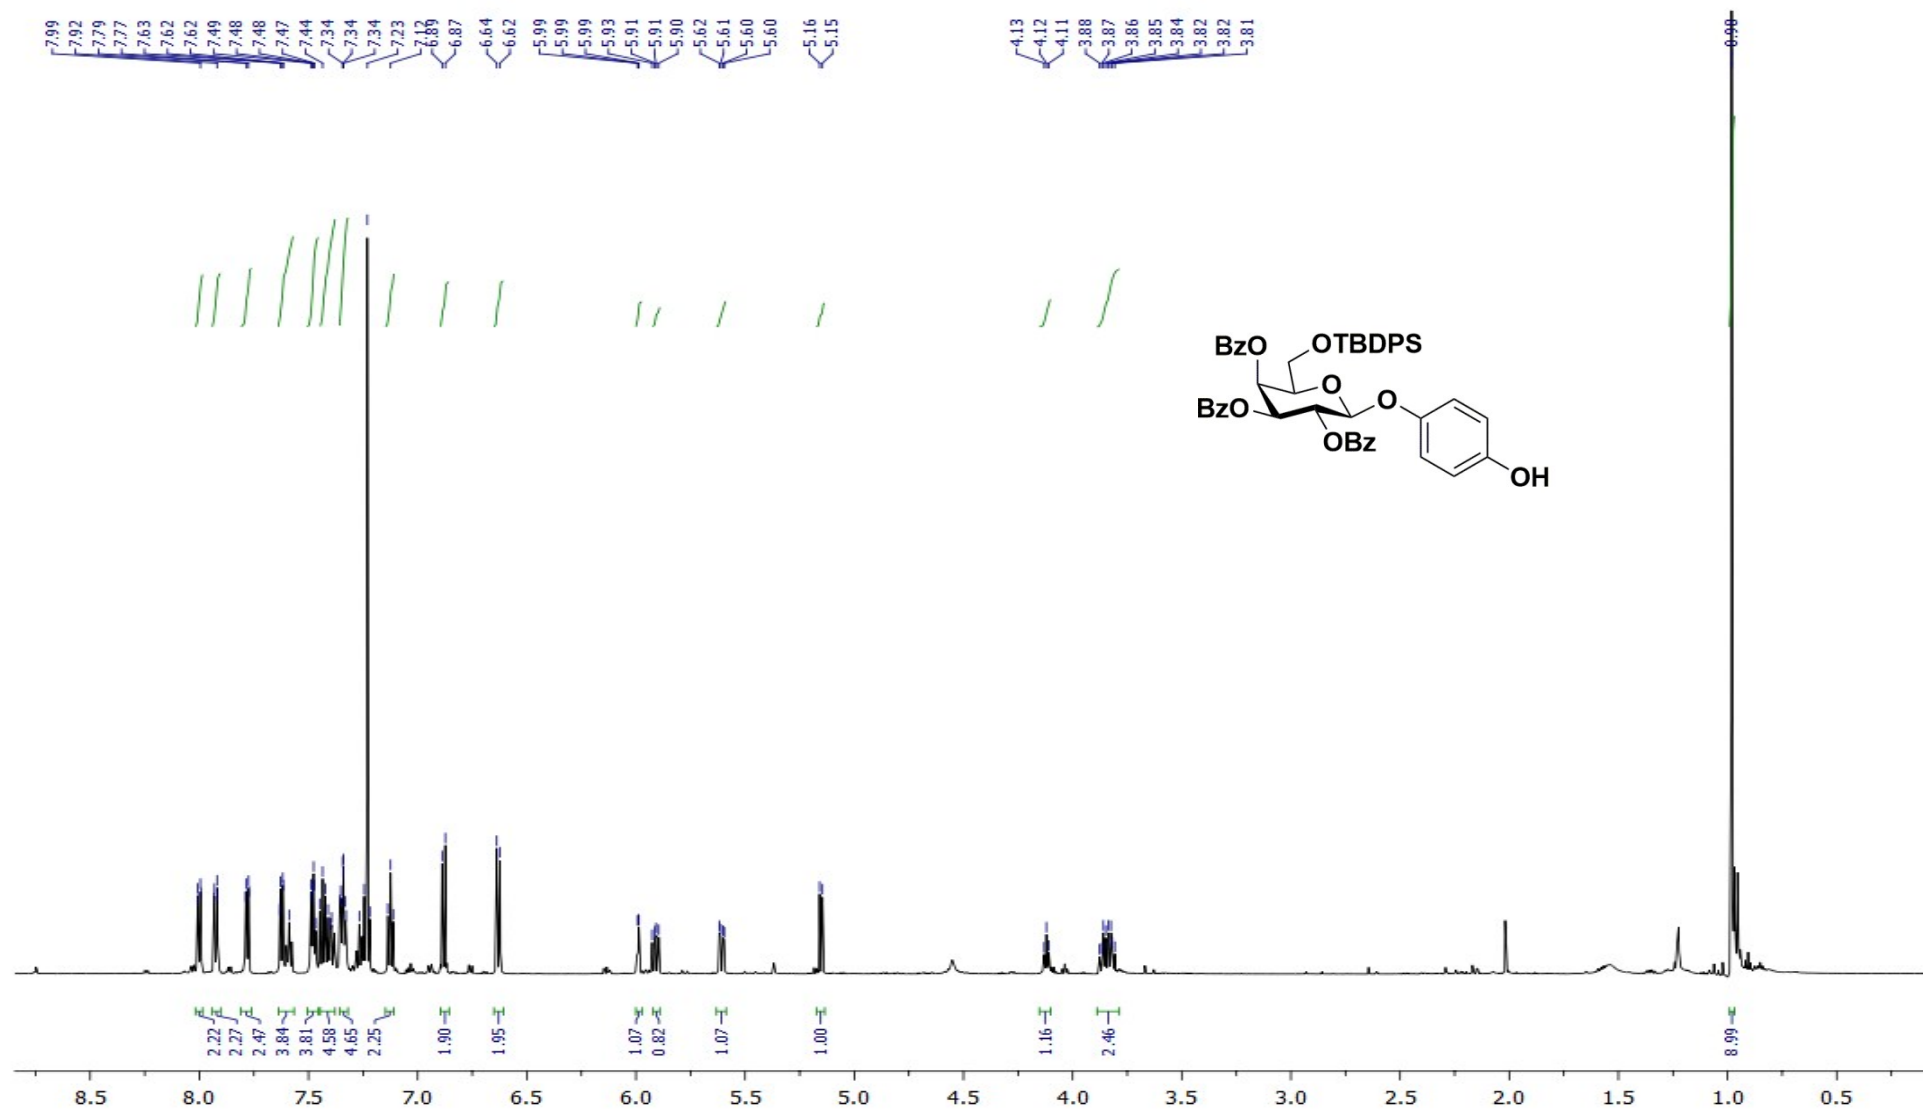

<sup>13</sup>C NMR of 4-hydroxyphenyl-2,3,4-tri-*O*-benzoyl-6-*O*-*t*-butyldiphenylsilyl-β-D-galactopyranoside (7a)

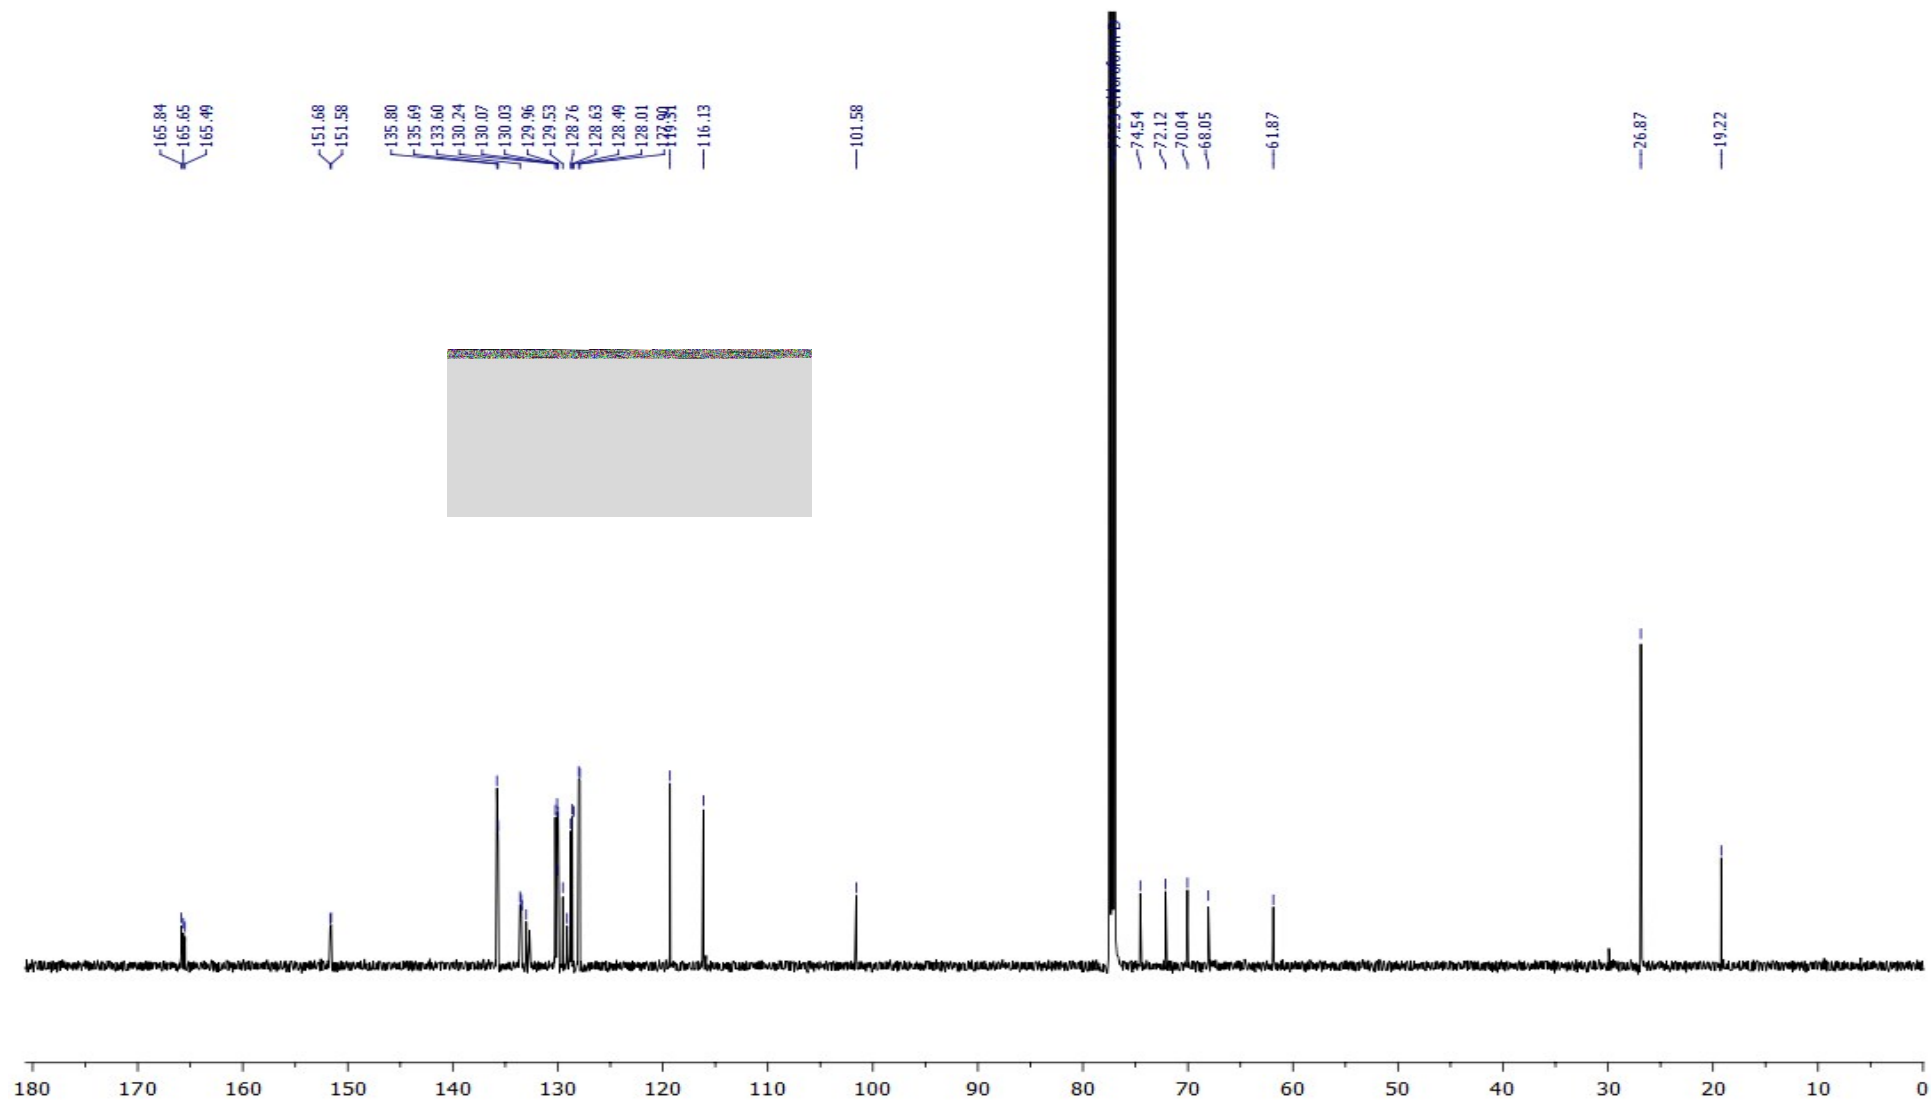

COSY NMR of 4-hydroxyphenyl-2,3,4-tri-*O*-benzoyl-6-*O*-*t*-butyldiphenylsilyl- $\beta$ -D-galactopyranoside (7a)

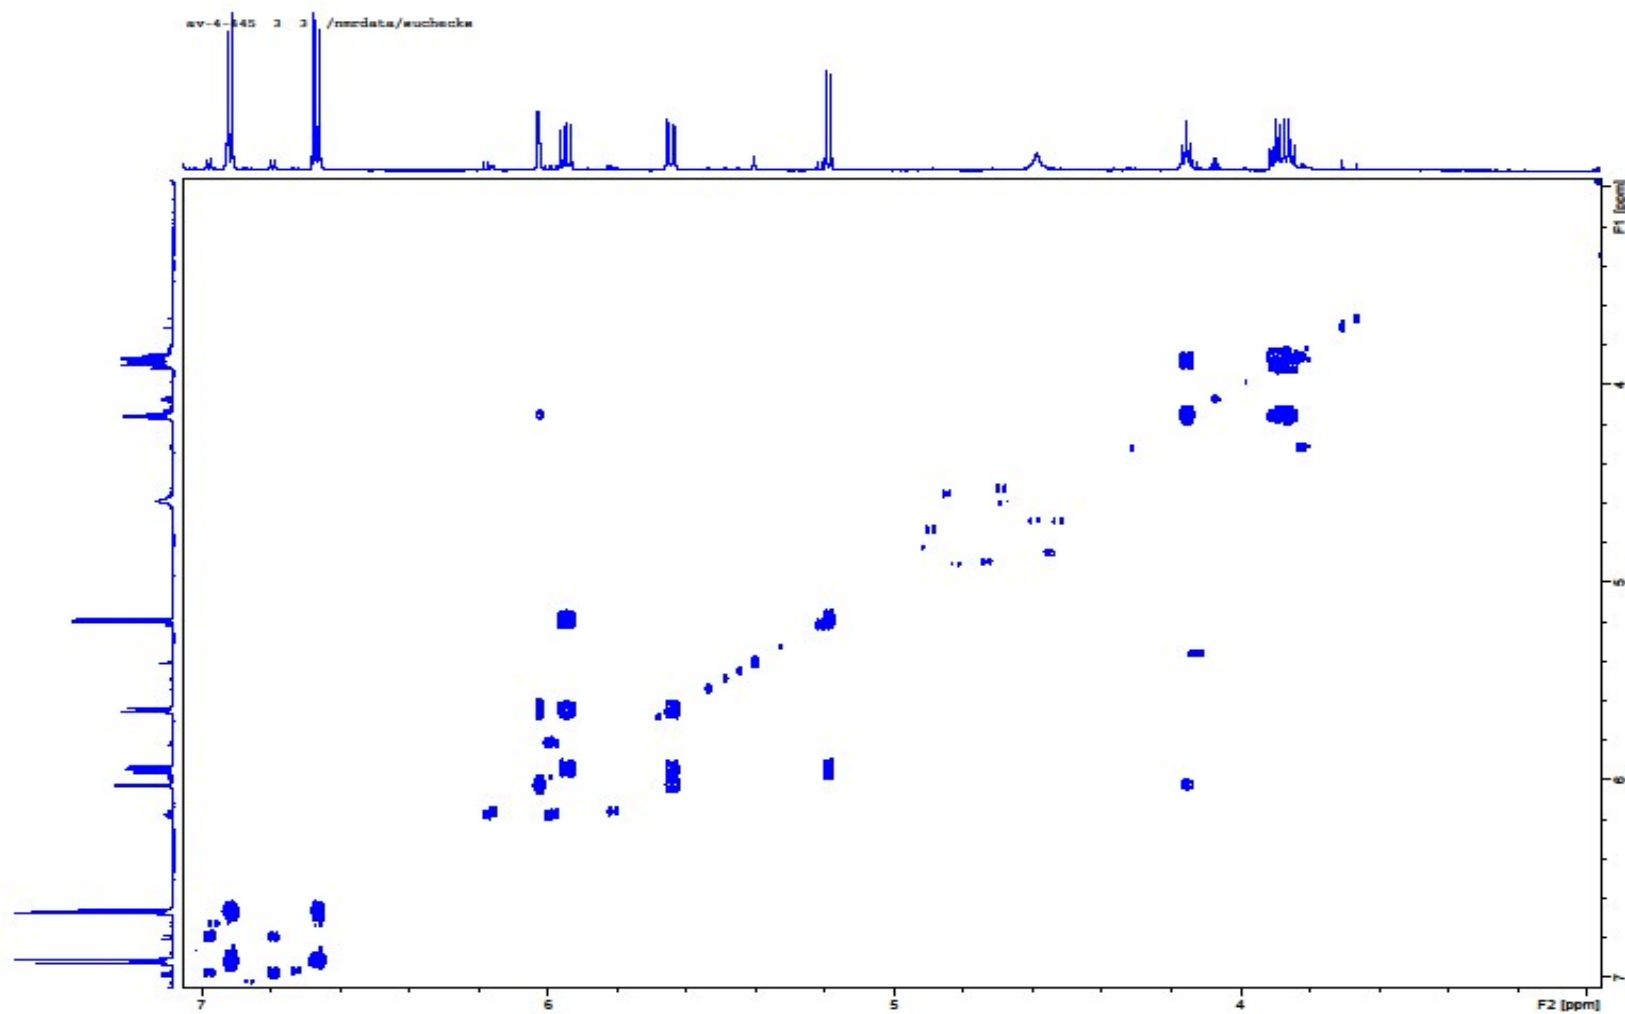

HRMS data of 4-hydroxyphenyl-2,3,4-tri-*O*-benzoyl-6-*O*-*t*-butyldiphenylsilyl-β-D-galactopyranosyl-(1→6)- 2,3,4-tri-*O*-benzyl- β -D-galactopyranoside (9a)

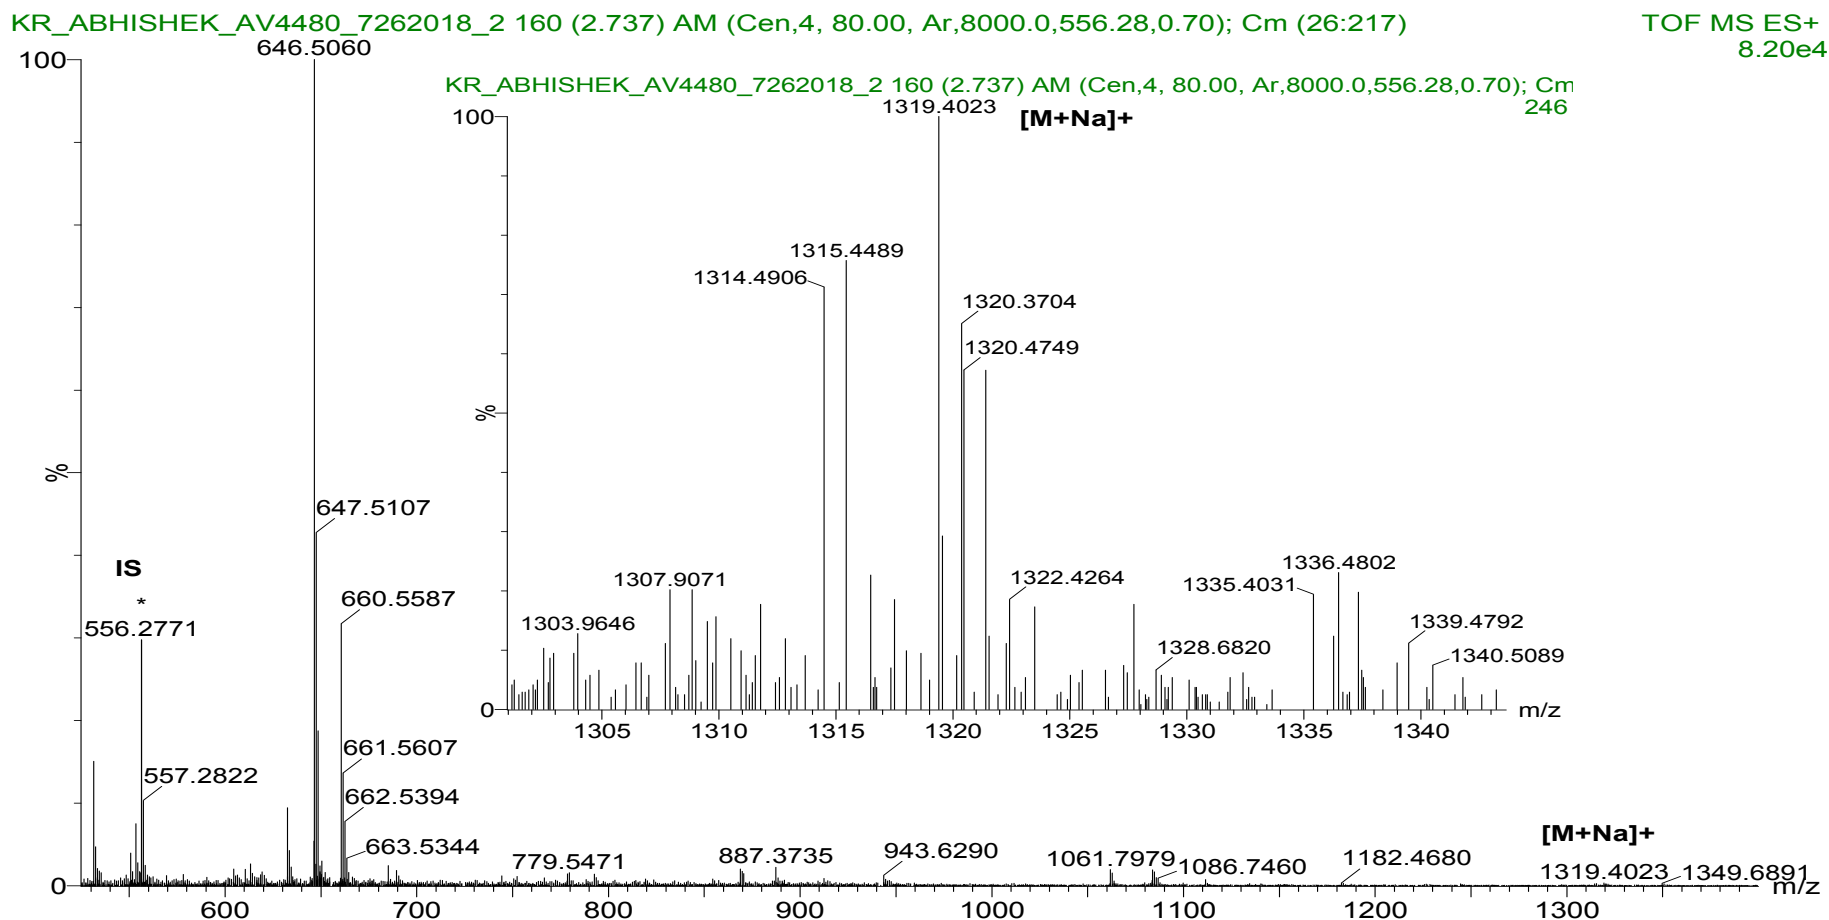

$$\text{Mass accuracy} = ((1319.4072 - 1319.4023) / 1319.4072) * 106 = 3.7 \text{ ppm}$$

<sup>1</sup>H NMR of 4-hydroxyphenyl-2,3,4-tri-*O*-benzoyl-6-*O*-*t*-butyldiphenylsilyl-β-D-galactopyranosyl-(1→6)- 2,3,4-tri-*O*-benzyl- β -D-galactopyranoside (9a)



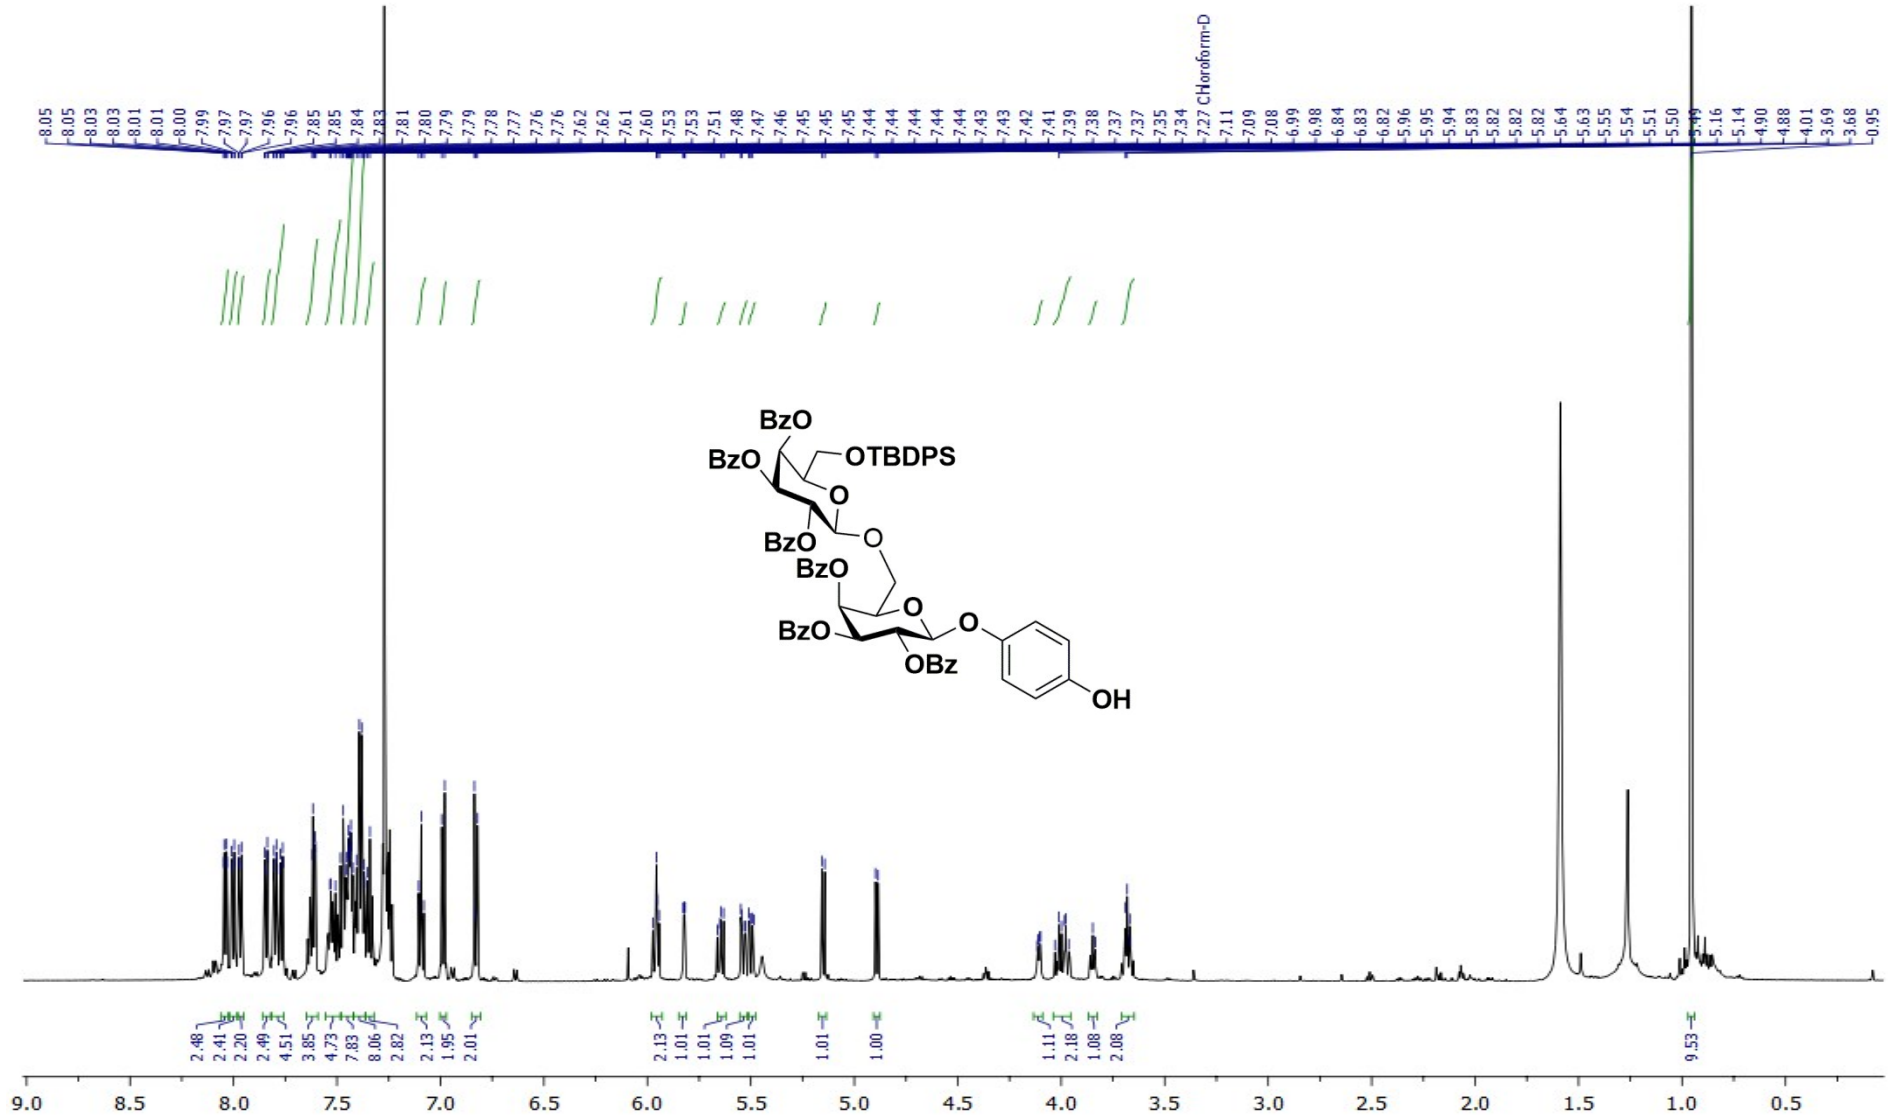

<sup>1</sup>H NMR of 4-hydroxyphenyl-2,3,4-tri-O-benzoyl-6-O-t-butyldiphenylsilyl-β-D-galactopyranosyl-(1→6)- 2,3,4-tri-O-benzyl- β -D-galactopyranoside (9a)

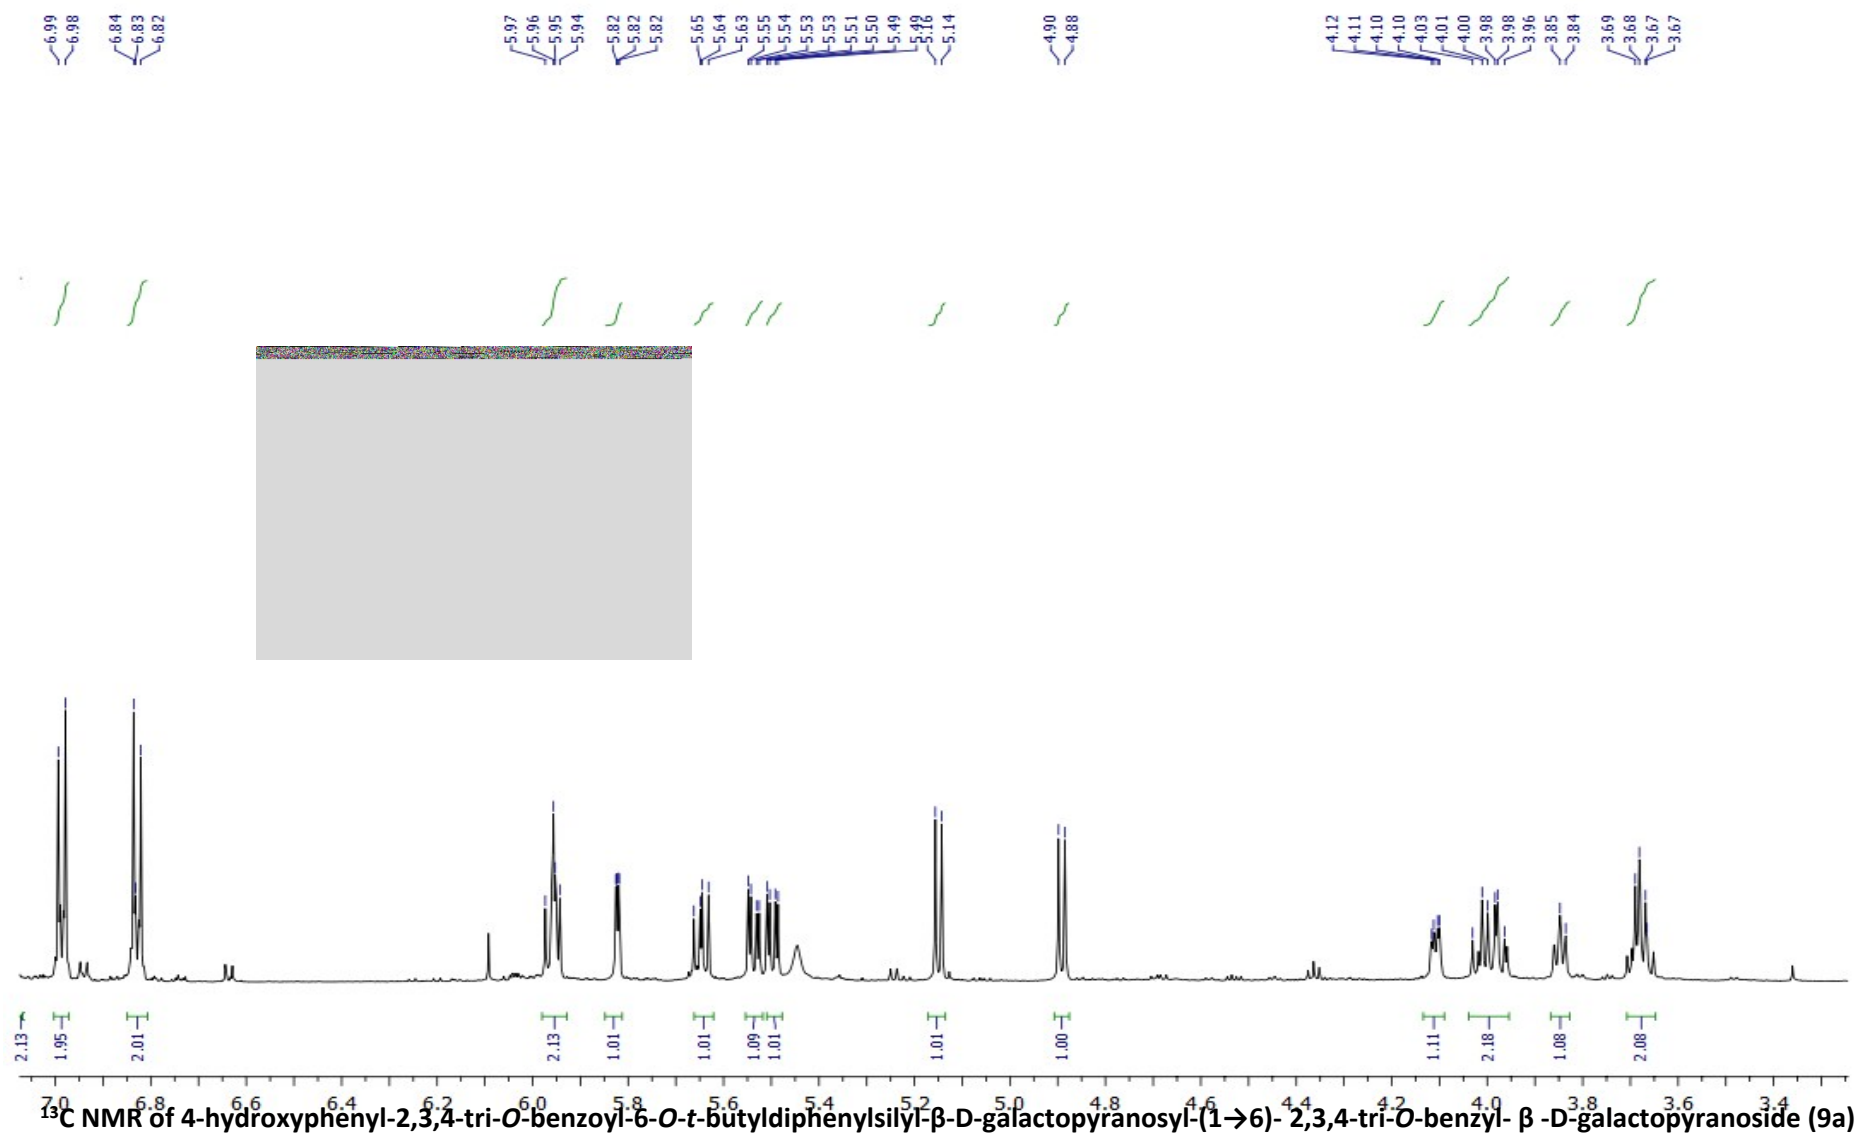

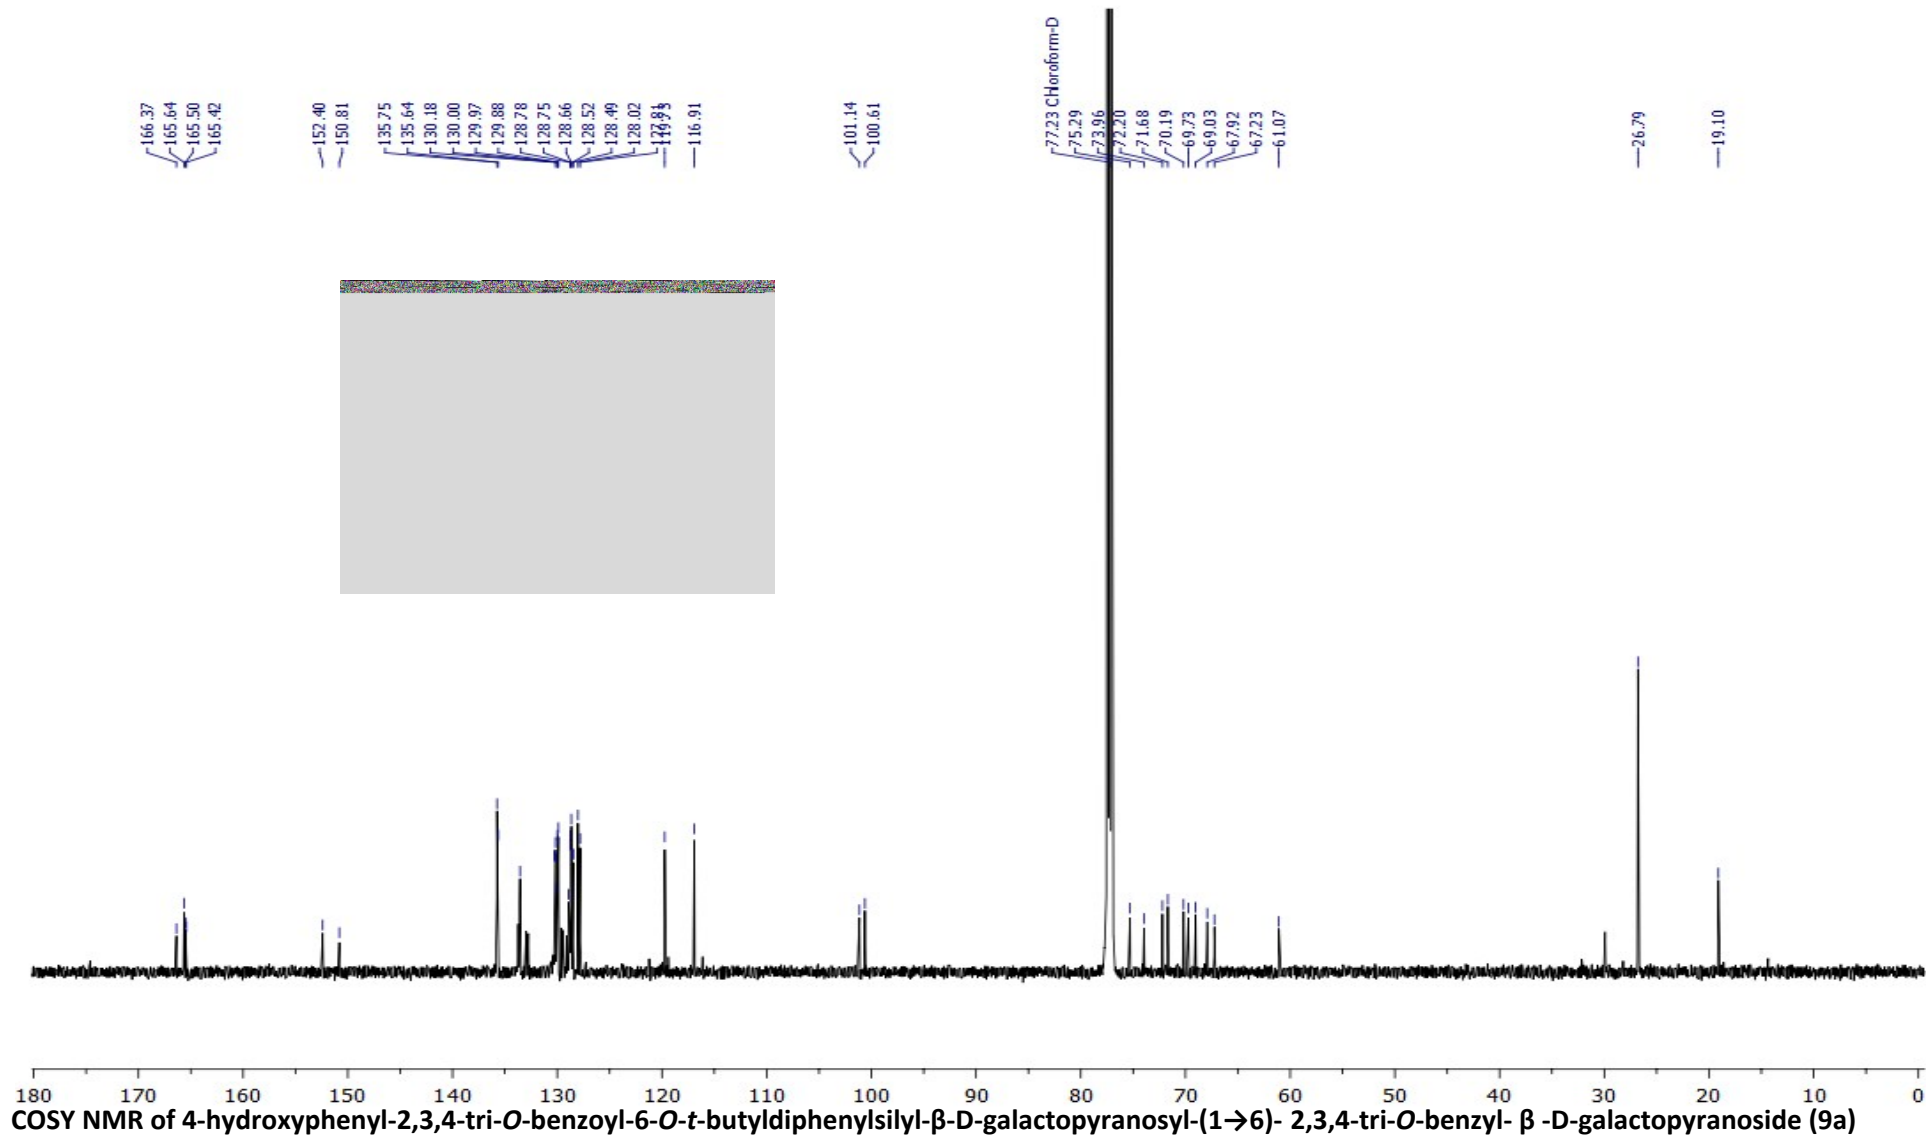

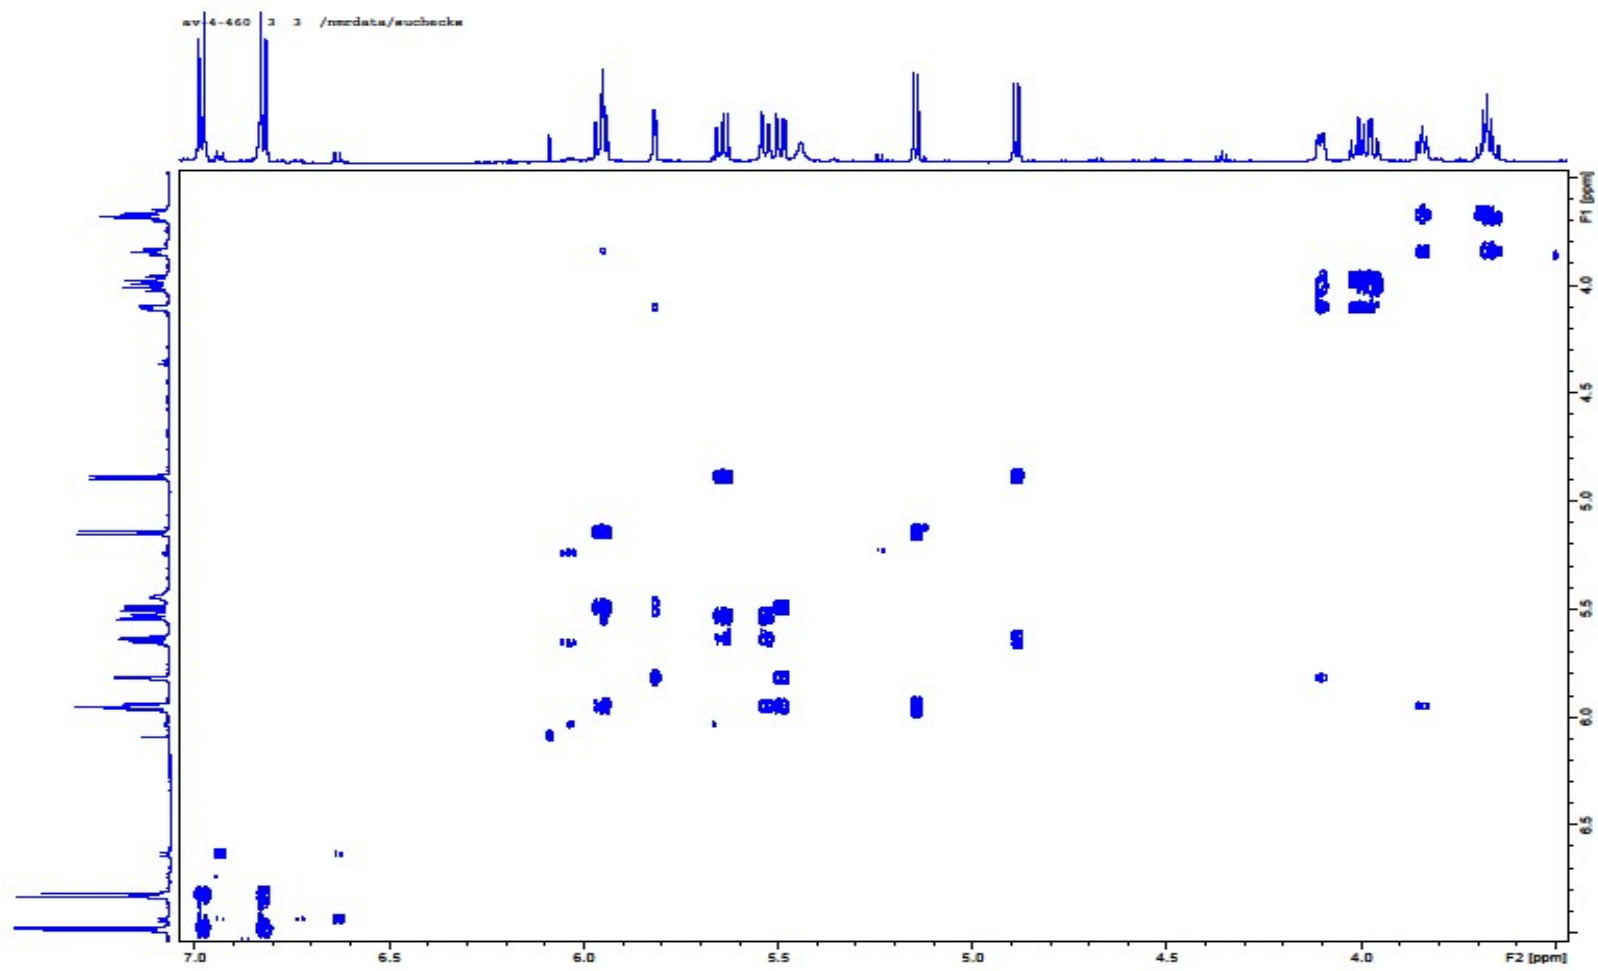

HRMS data of 4-hydroxyphenyl-2,3,4-tri-*O*-benzoyl-6-*O*-*t*-butyldiphenylsilyl- $\beta$ -D-galactopyranosyl-(1 $\rightarrow$ 6)- 2,3,4-tri-*O*-benzyl-  $\beta$ -D-galactopyranosyl-(1 $\rightarrow$ 6)- 2,3,4-tri-*O*-benzyl-  $\beta$ -D-galactopyranoside (11a)

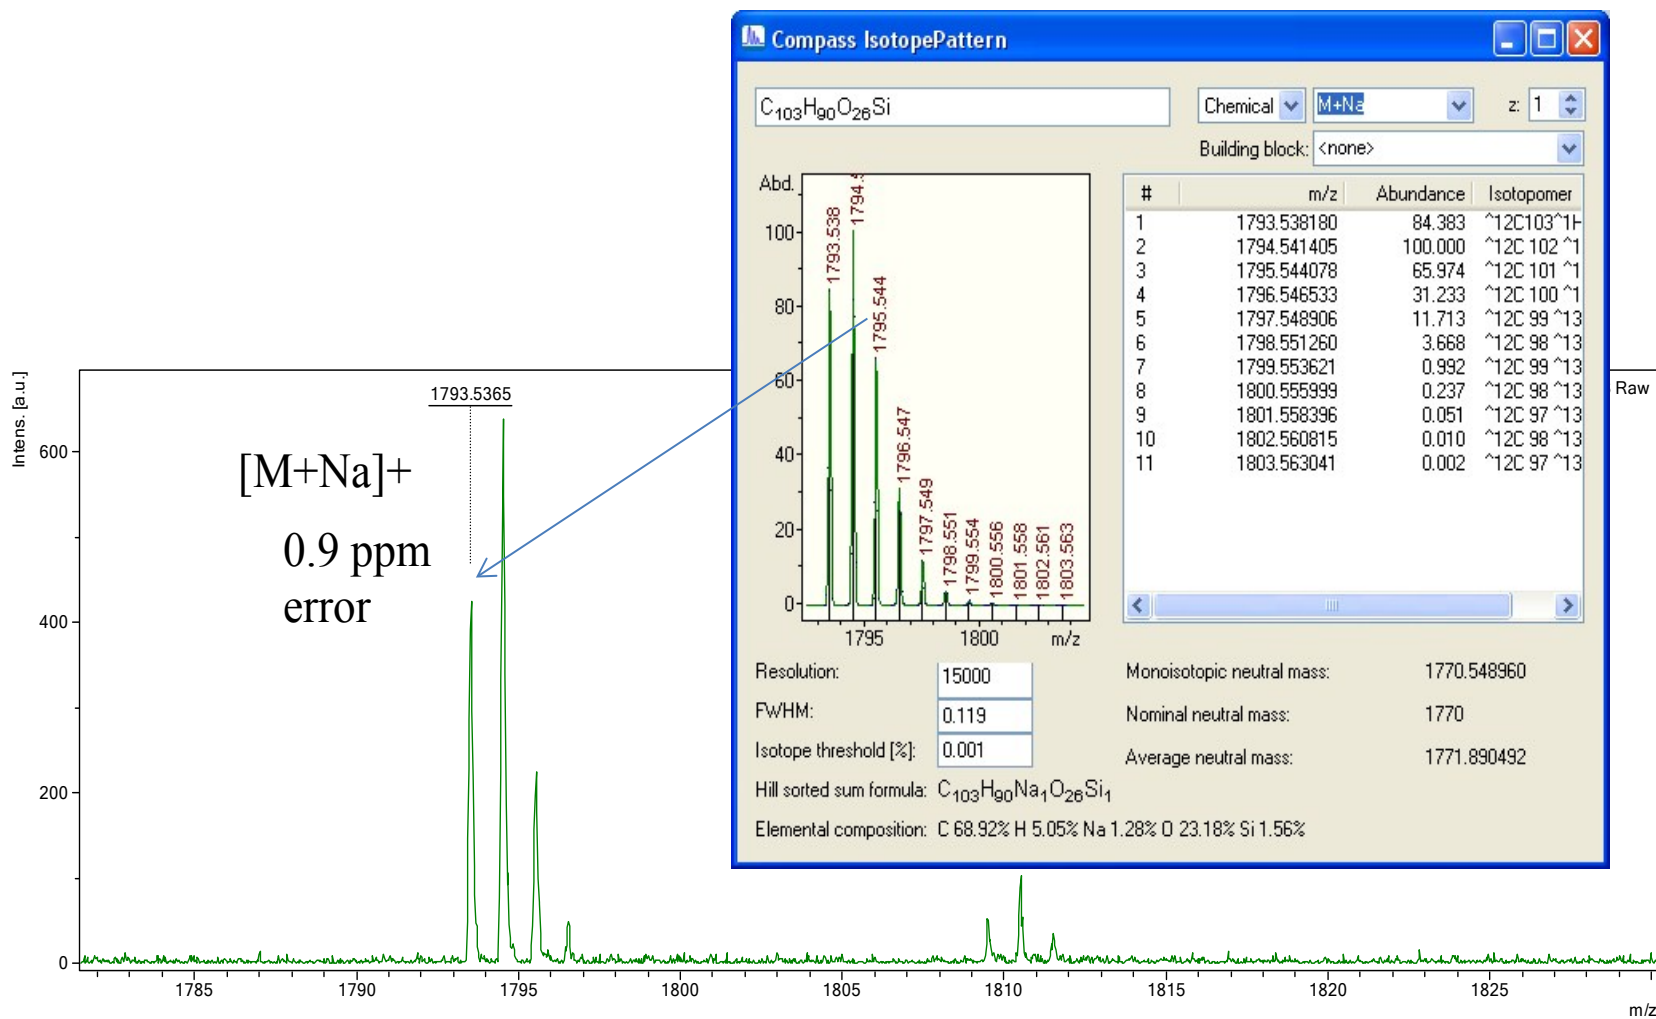

<sup>1</sup>H NMR of 4-hydroxyphenyl-2,3,4-tri-O-benzoyl-6-O-*t*-butyldiphenylsilyl-β-D-galactopyranosyl-(1→6)- 2,3,4-tri-O-benzyl- β -D-galactopyranosyl-(1→6)- 2,3,4-tri-O-benzyl- β -D-galactopyranoside (11a)

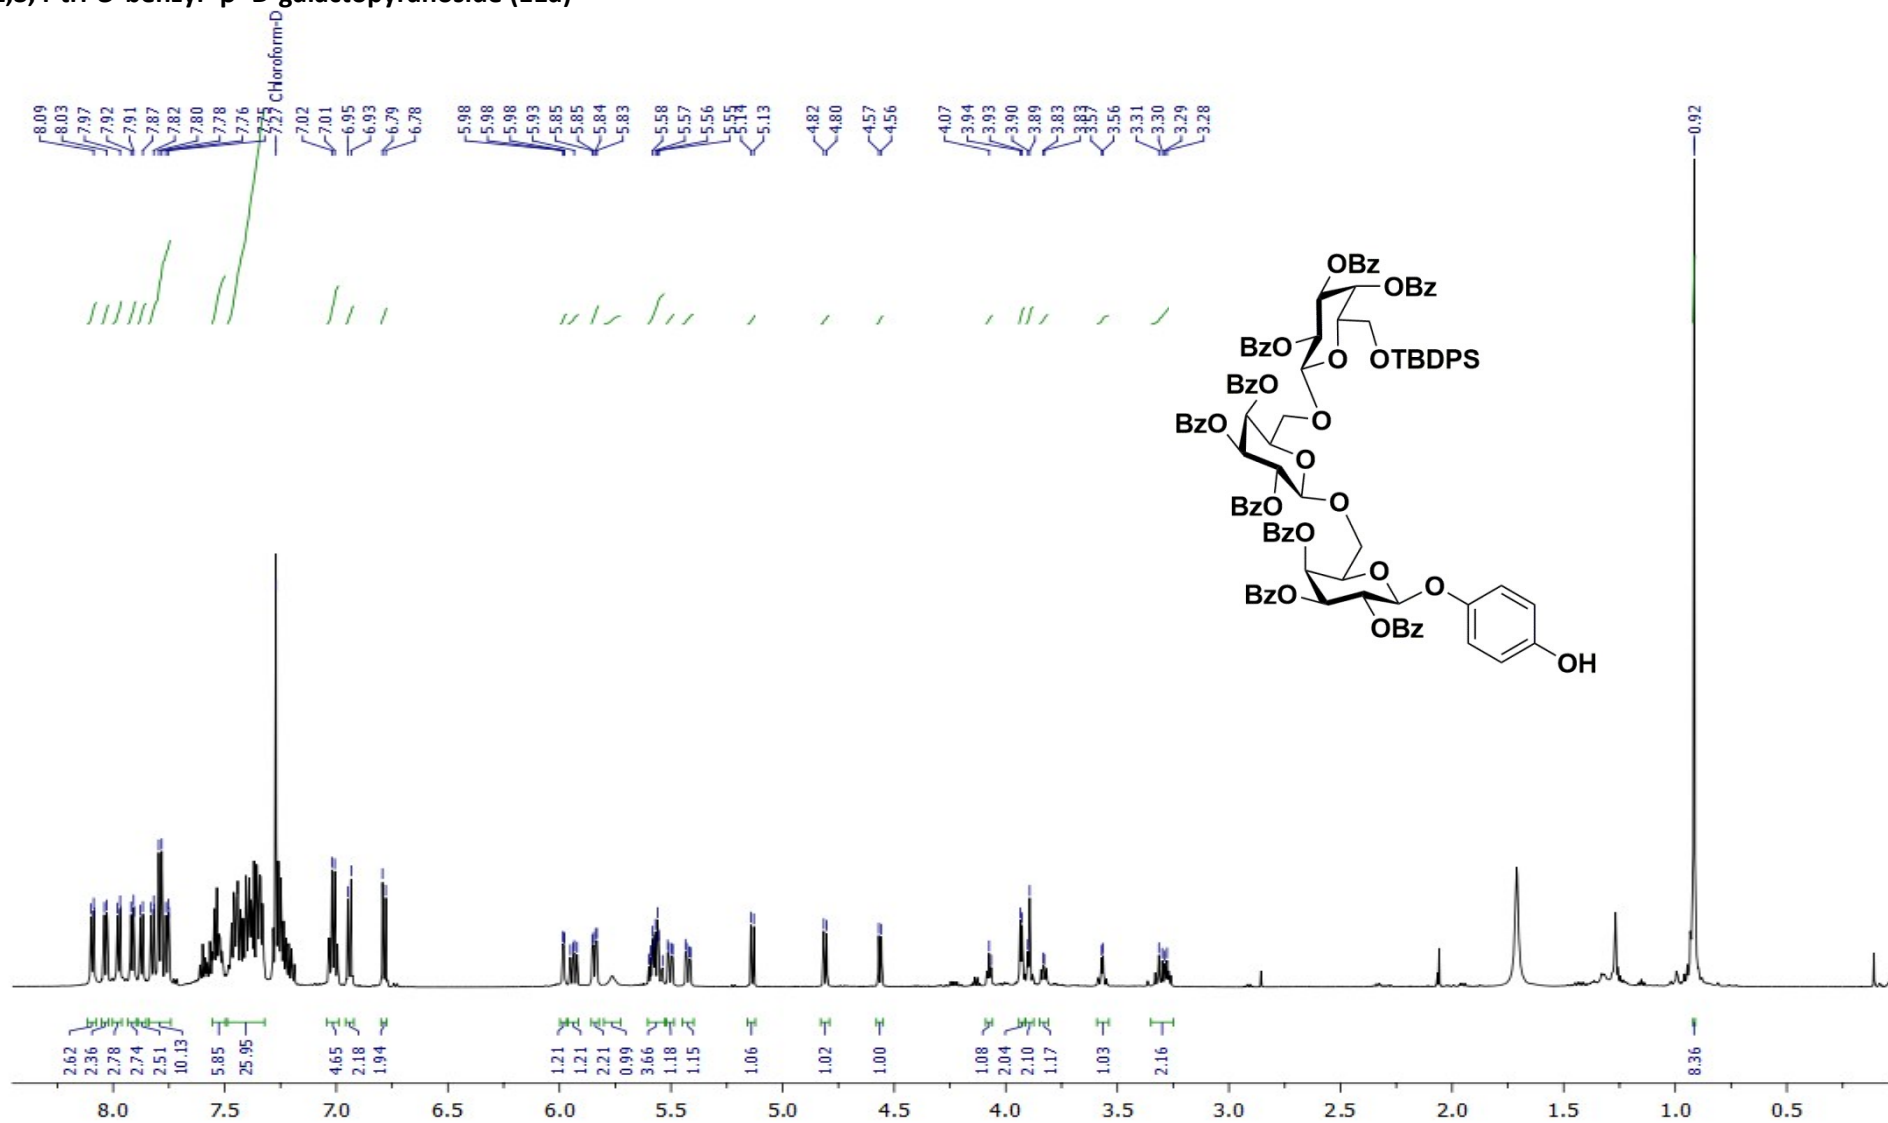

**<sup>1</sup>H NMR of 4-hydroxyphenyl-2,3,4-tri-*O*-benzoyl-6-*O*-*t*-butyldiphenylsilyl-β-D-galactopyranosyl-(1→6)- 2,3,4-tri-*O*-benzyl- β -D-galactopyranosyl-(1→6)- 2,3,4-tri-*O*-benzyl- β -D-galactopyranoside (11a)**

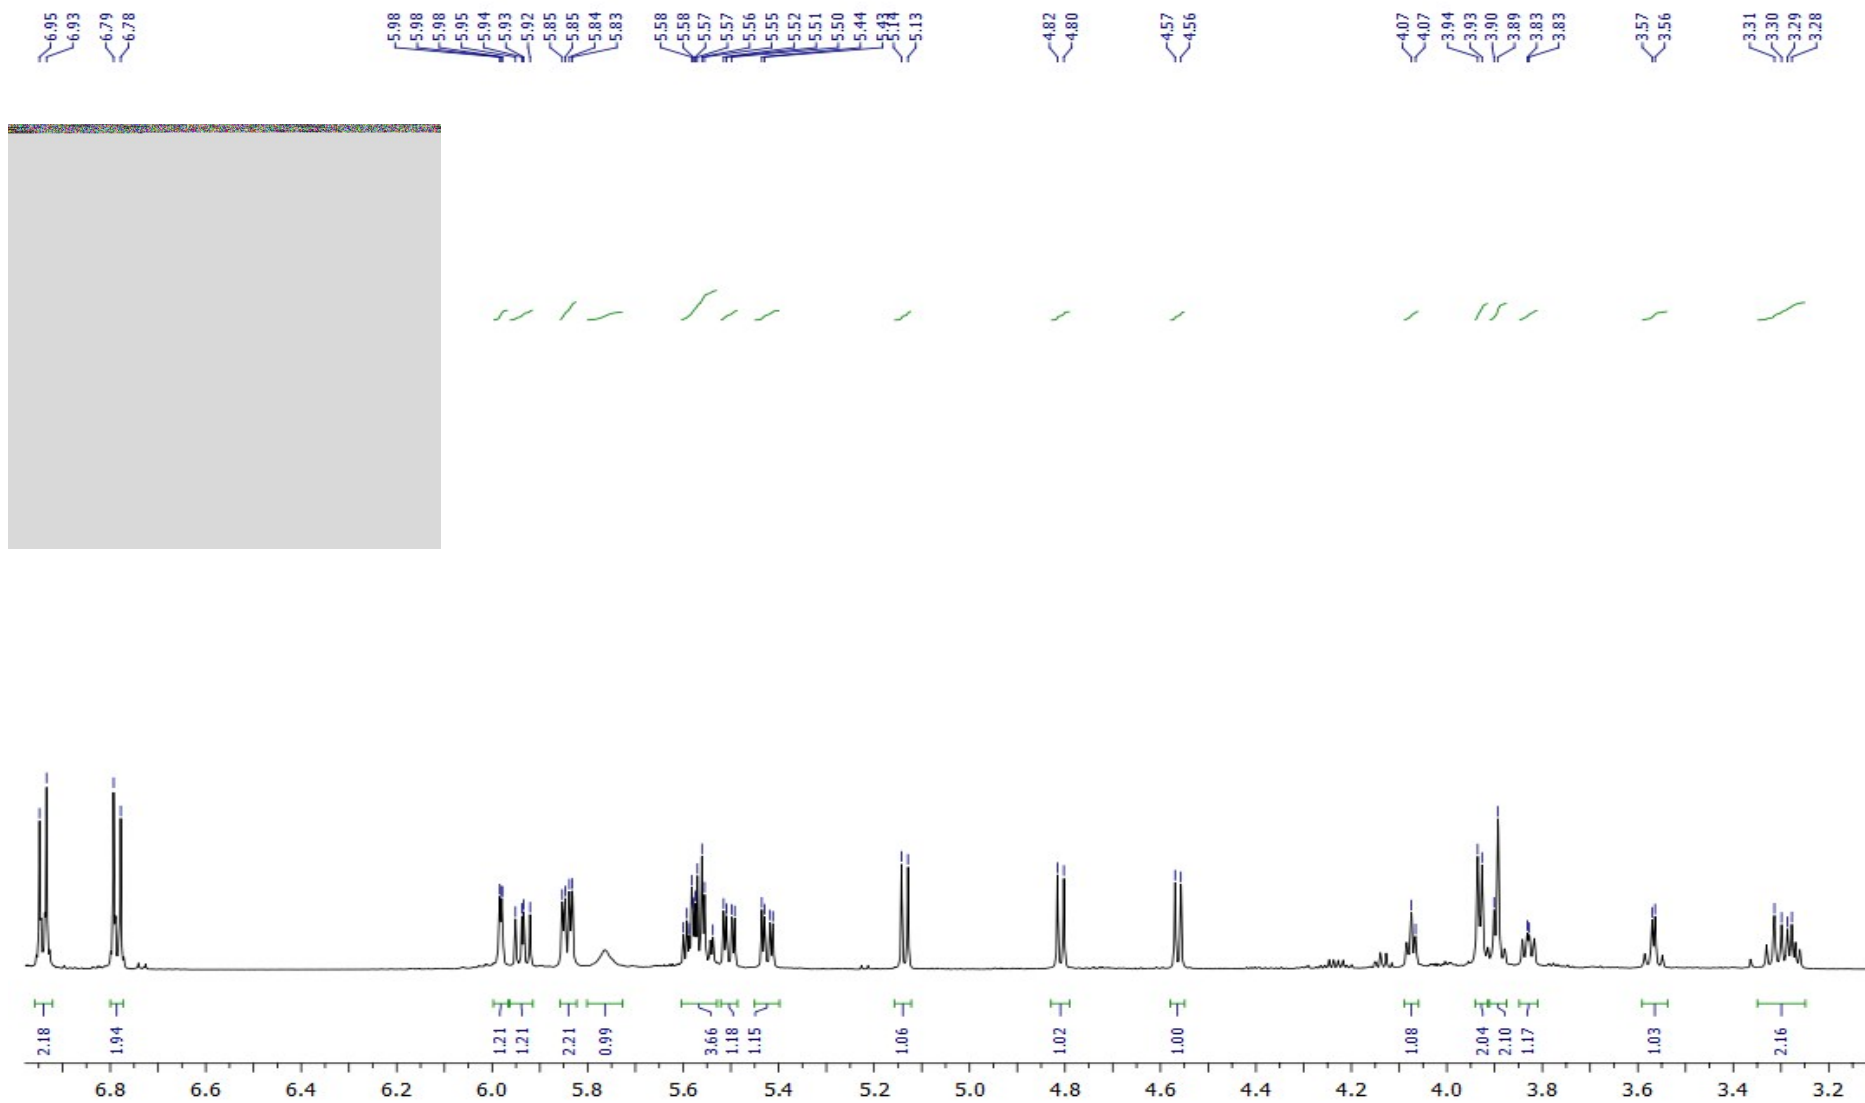

**<sup>13</sup>C NMR of 4-hydroxyphenyl-2,3,4-tri-*O*-benzoyl-6-*O*-*t*-butyldiphenylsilyl-β-D-galactopyranosyl-(1→6)- 2,3,4-tri-*O*-benzyl- β -D-galactopyranosyl-(1→6)- 2,3,4-tri-*O*-benzyl- β -D-galactopyranoside (11a)**

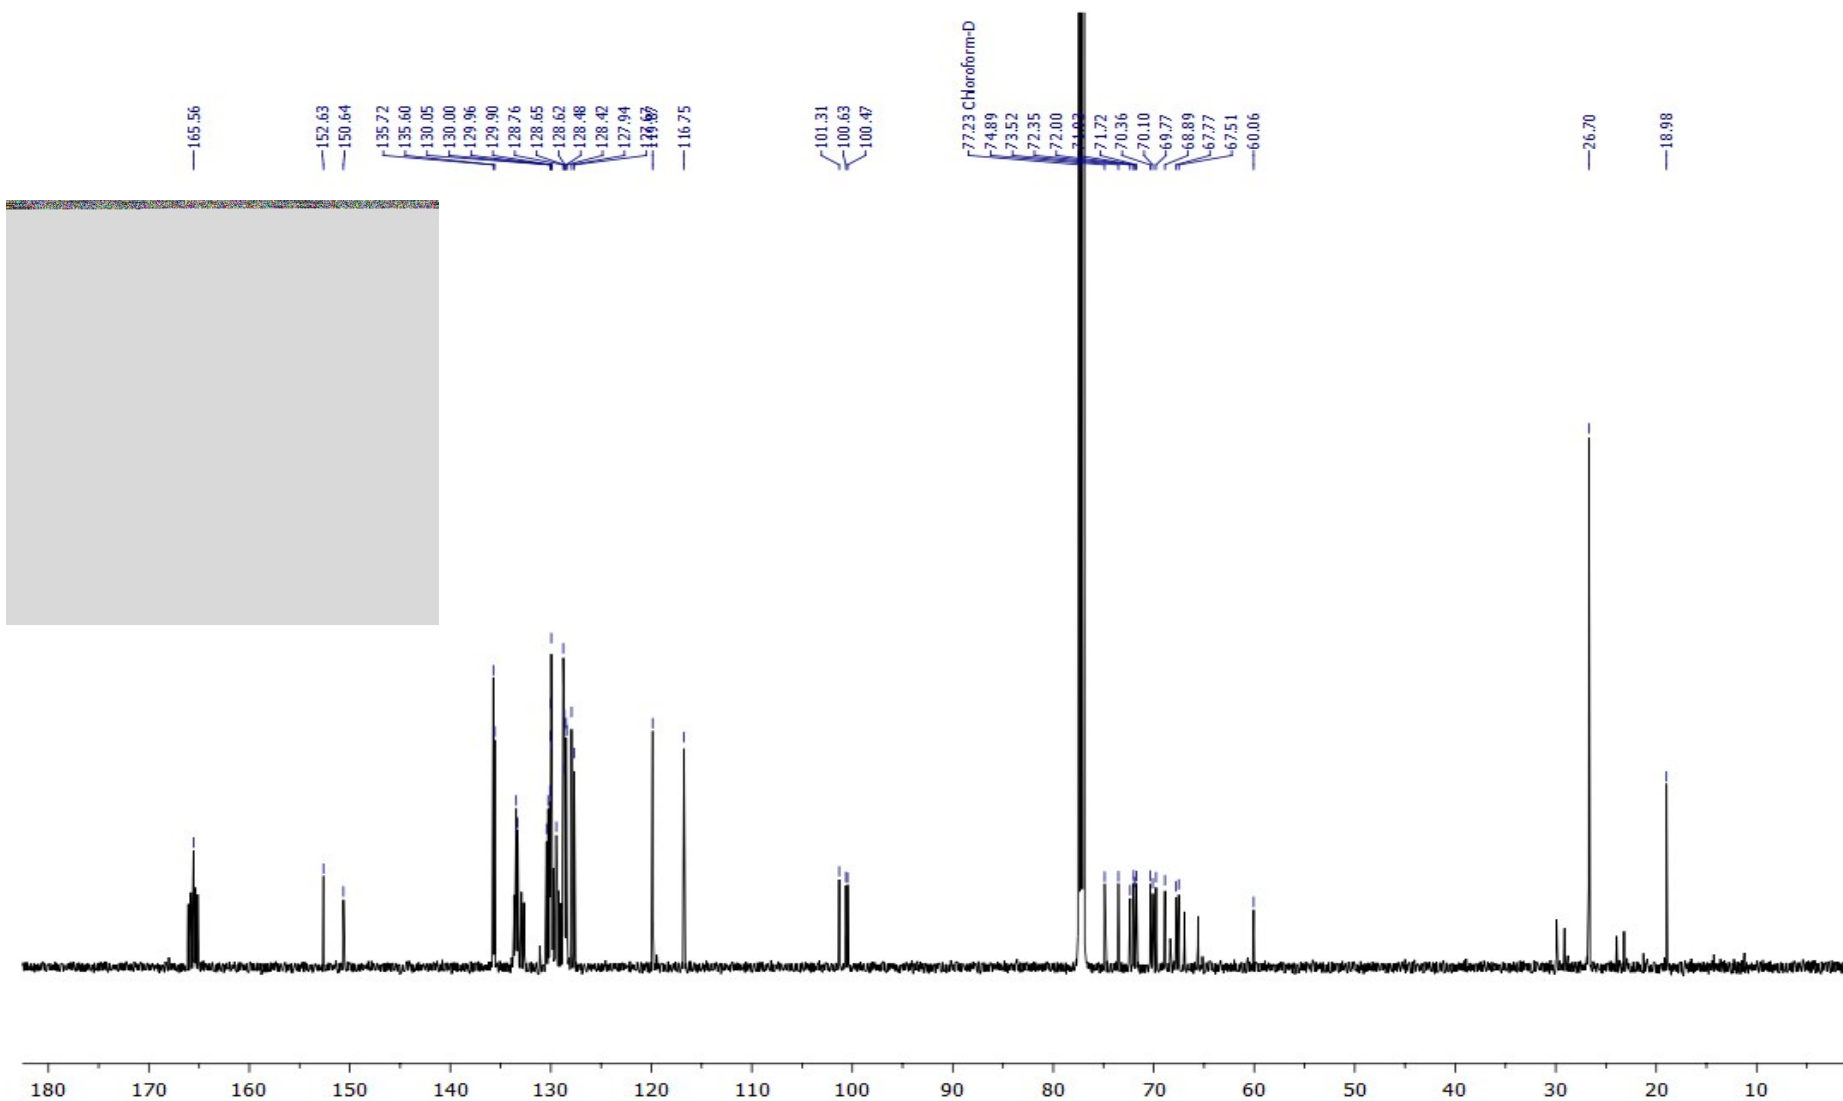



COSY NMR of 4-hydroxyphenyl-2,3,4-tri-*O*-benzoyl-6-*O*-*t*-butyldiphenylsilyl- $\beta$ -D-galactopyranosyl-(1 $\rightarrow$ 6)- 2,3,4-tri-*O*-benzyl-  $\beta$ -D-galactopyranosyl-(1 $\rightarrow$ 6)- 2,3,4-tri-*O*-benzyl-  $\beta$ -D-galactopyranoside (11a)

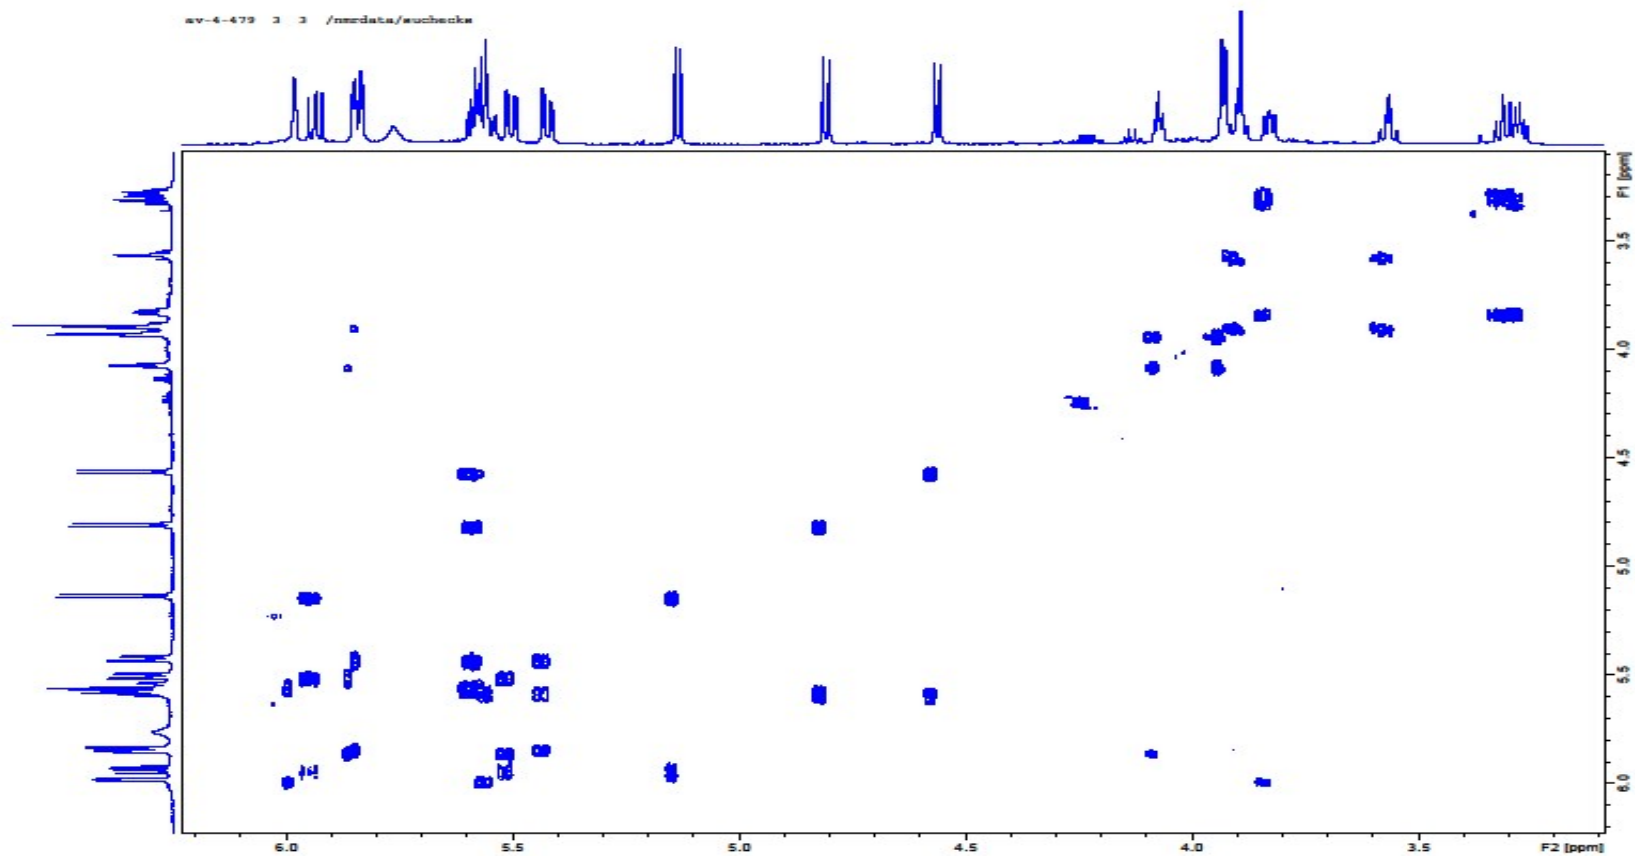

HRMS data of 4-((4-carboxylate-2-nitrobenzyl)oxy)phenyl-2,3,4-tri-*O*-benzoyl-6-*O*-*t*-butyldiphenylsilyl  $\beta$ -D-glucopyranoside (12)

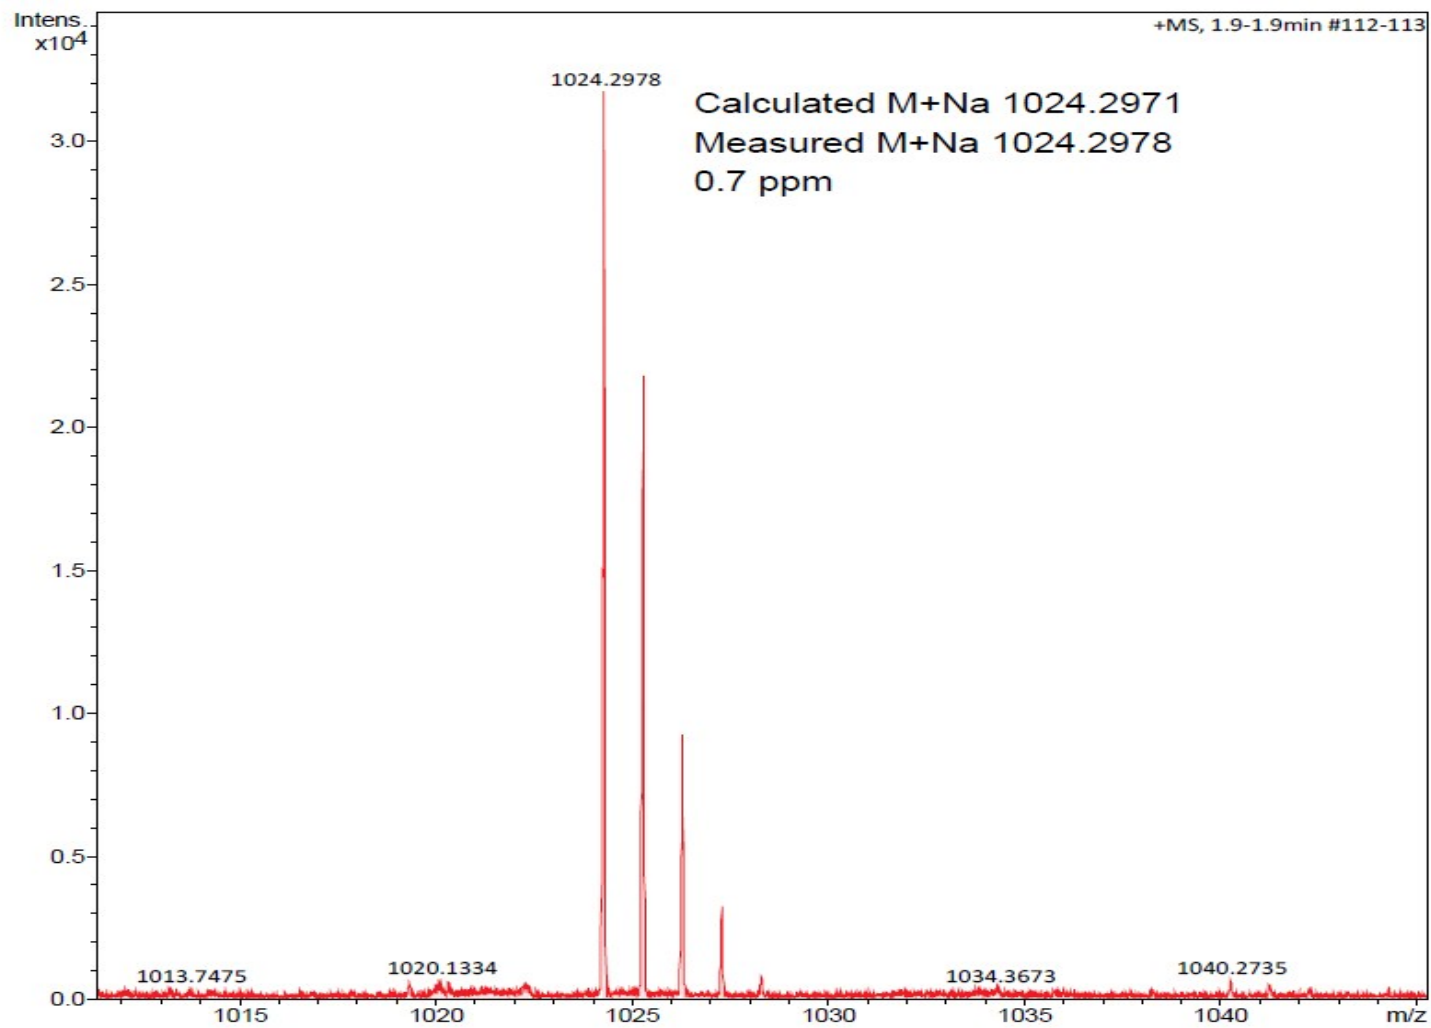

<sup>1</sup>H NMR of 4-((4-carboxylate-2-nitrobenzyl)oxy)phenyl-2,3,4-tri-*O*-benzoyl-6-*O*-*t*-butyldiphenylsilyl β-D-glucopyranoside (12)

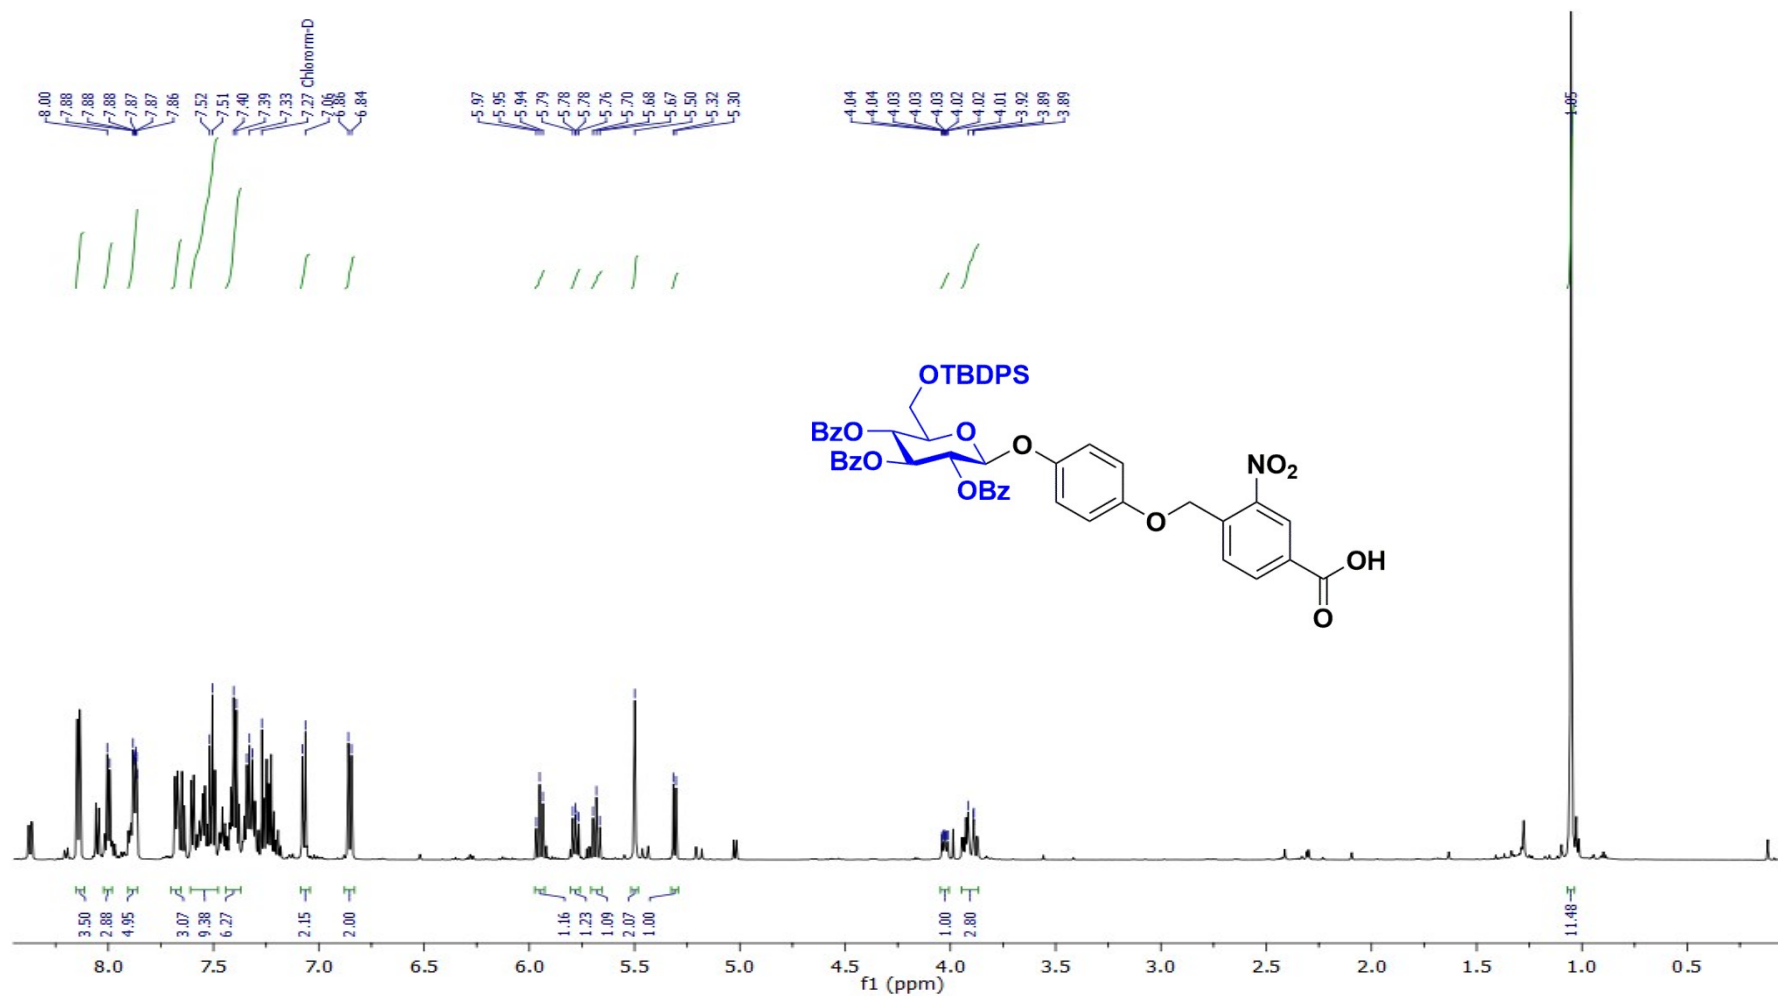

<sup>13</sup>C NMR of 4-((4-carboxylate-2-nitrobenzyl)oxy)phenyl-2,3,4-tri-O-benzoyl-6-O-t-butylidiphenylsilyl β-D-glucopyranoside (12)

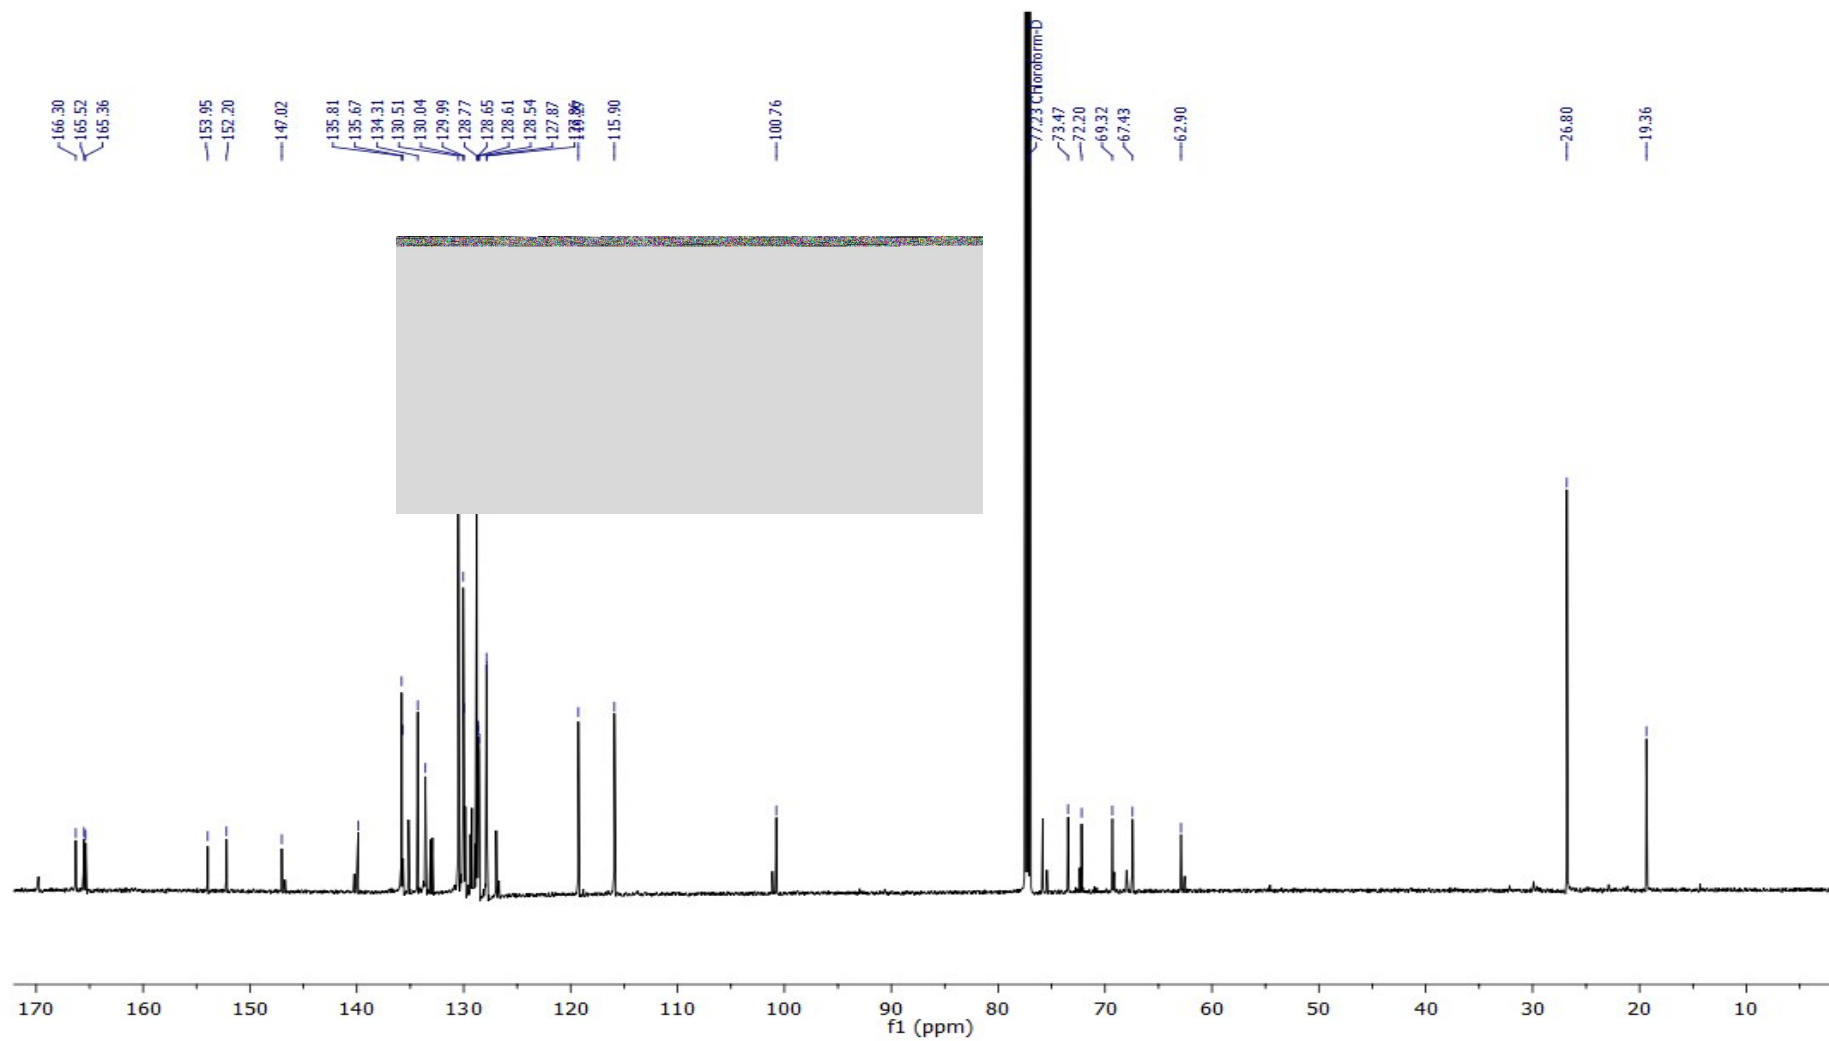

COSY NMR of 4-((4-carboxylate-2-nitrobenzyl)oxy)phenyl-2,3,4-tri-O-benzoyl-6-O-t-butylidiphenylsilyl  $\beta$ -D-glucopyranoside (12)

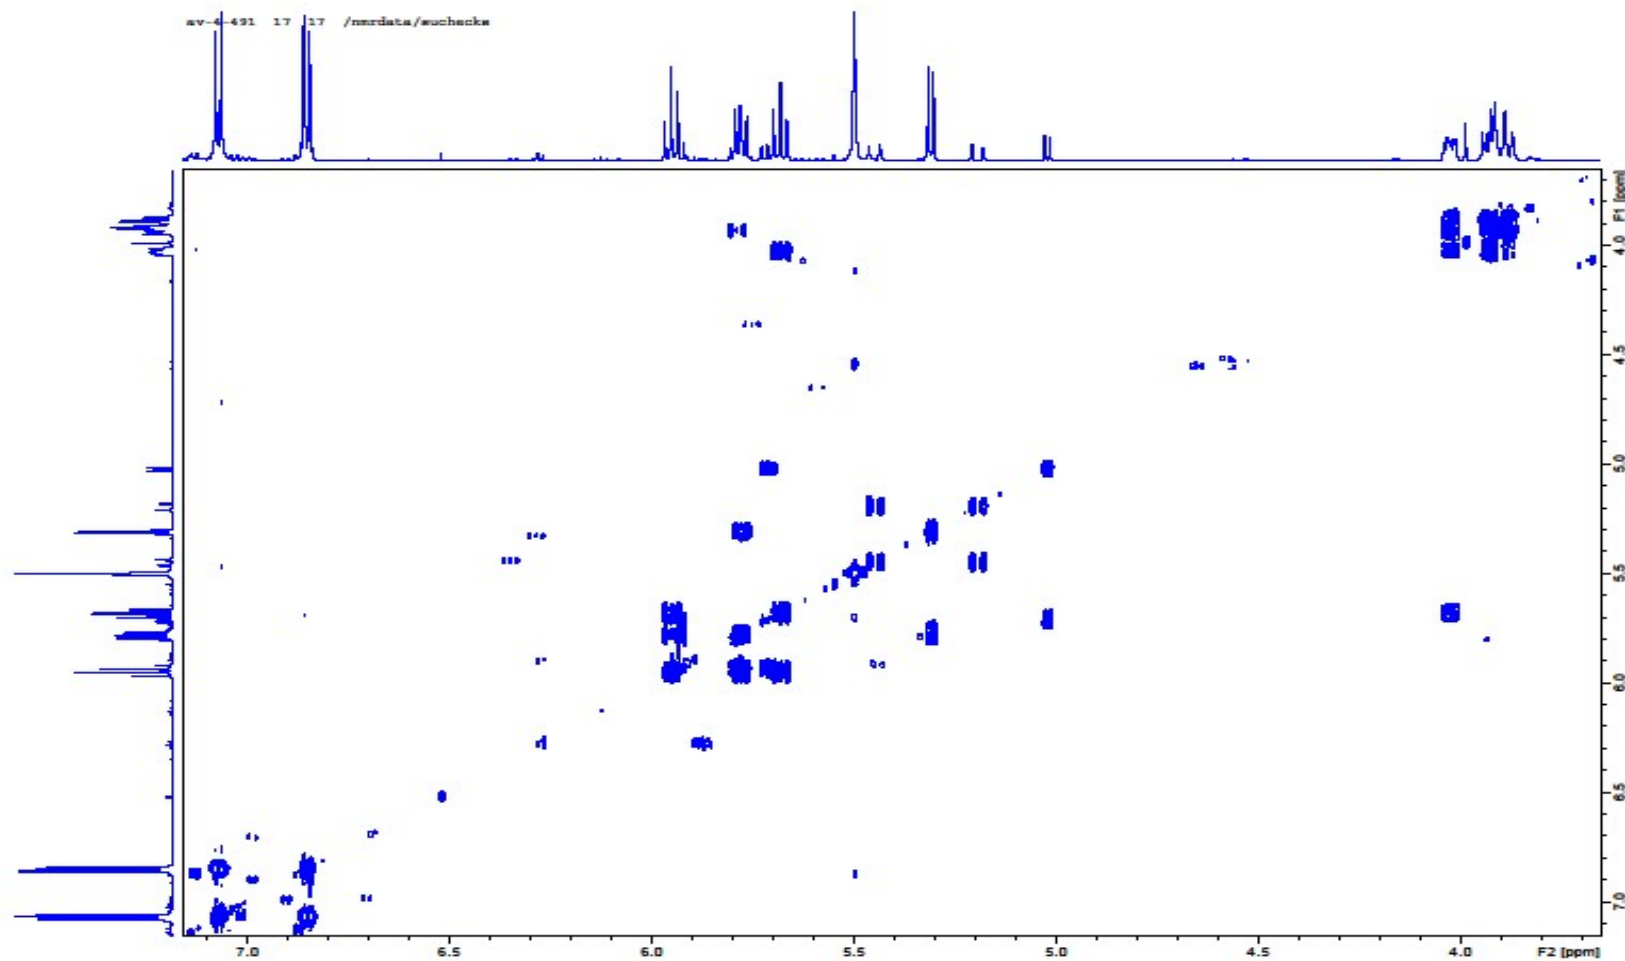

HRMS data of 4-hydroxyphenyl-2-O-levulinate-3,4-di-O-benzyl- $\alpha$ -L-rhamnopyranosyl-(1 $\rightarrow$ 6)-2,3,4-tri-O-benzyl- $\beta$ -D-glucopyranoside (15a)

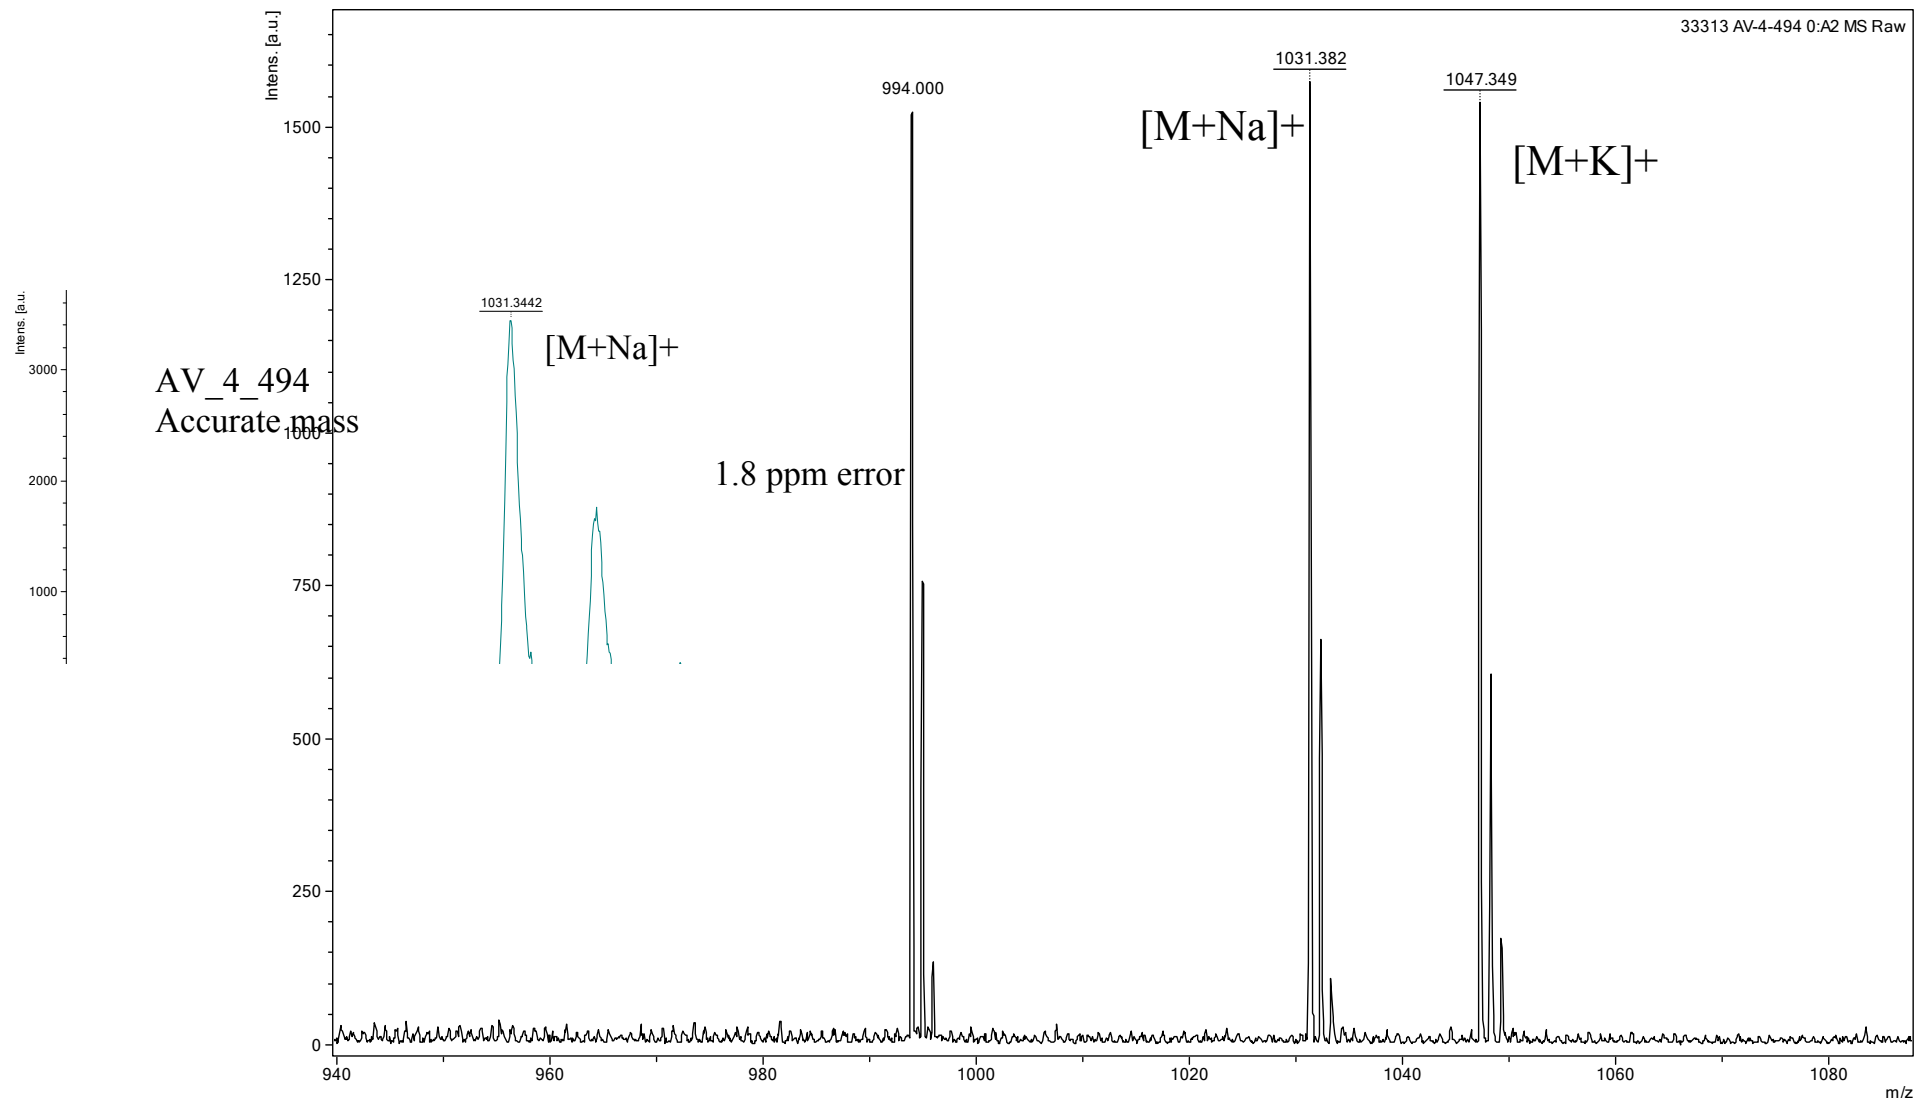

<sup>1</sup>H NMR of 4-hydroxyphenyl-2-O-levulinate-3,4-di-O-benzyl-α-L-rhamnopyranosyl-(1→6)-2,3,4-tri-O-benzyl-β-D-glucopyranoside (15a)

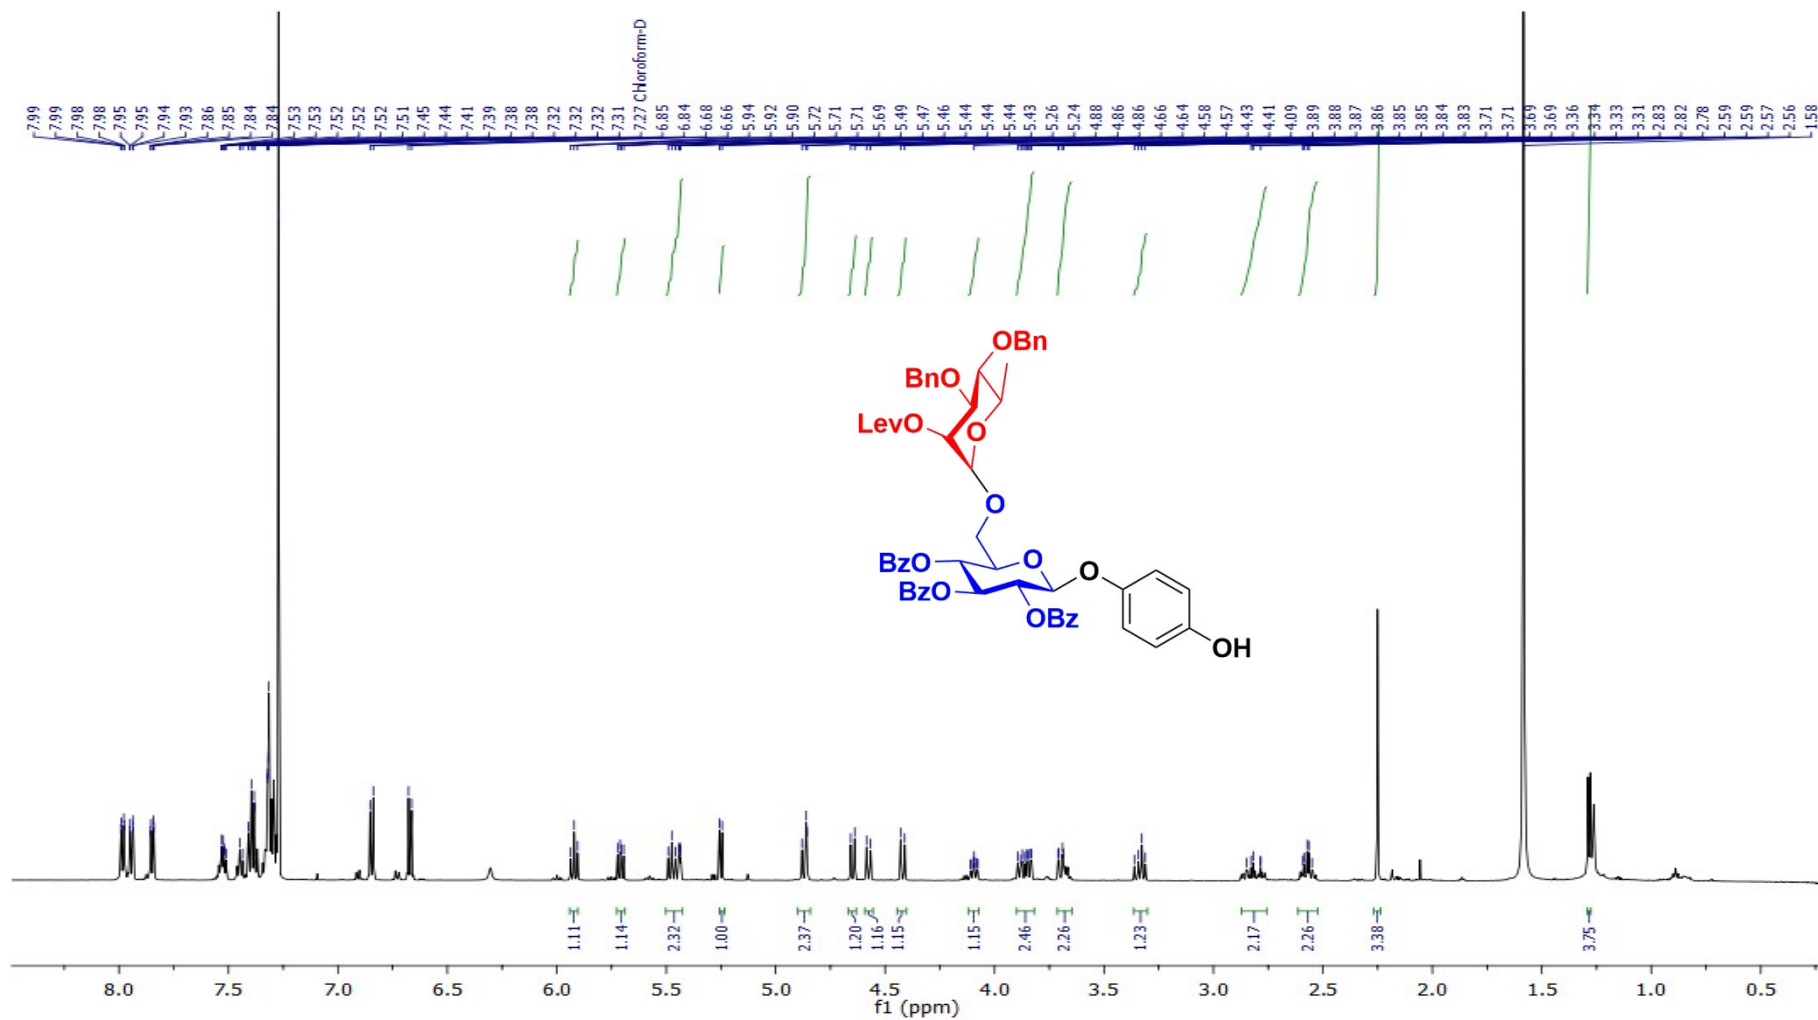

<sup>13</sup>C NMR of 4-hydroxyphenyl-2-O-levulinate-3,4-di-O-benzyl-α-L-rhamnopyranosyl-(1→6)-2,3,4-tri-O-benzyl-β-D-glucopyranoside (15a)

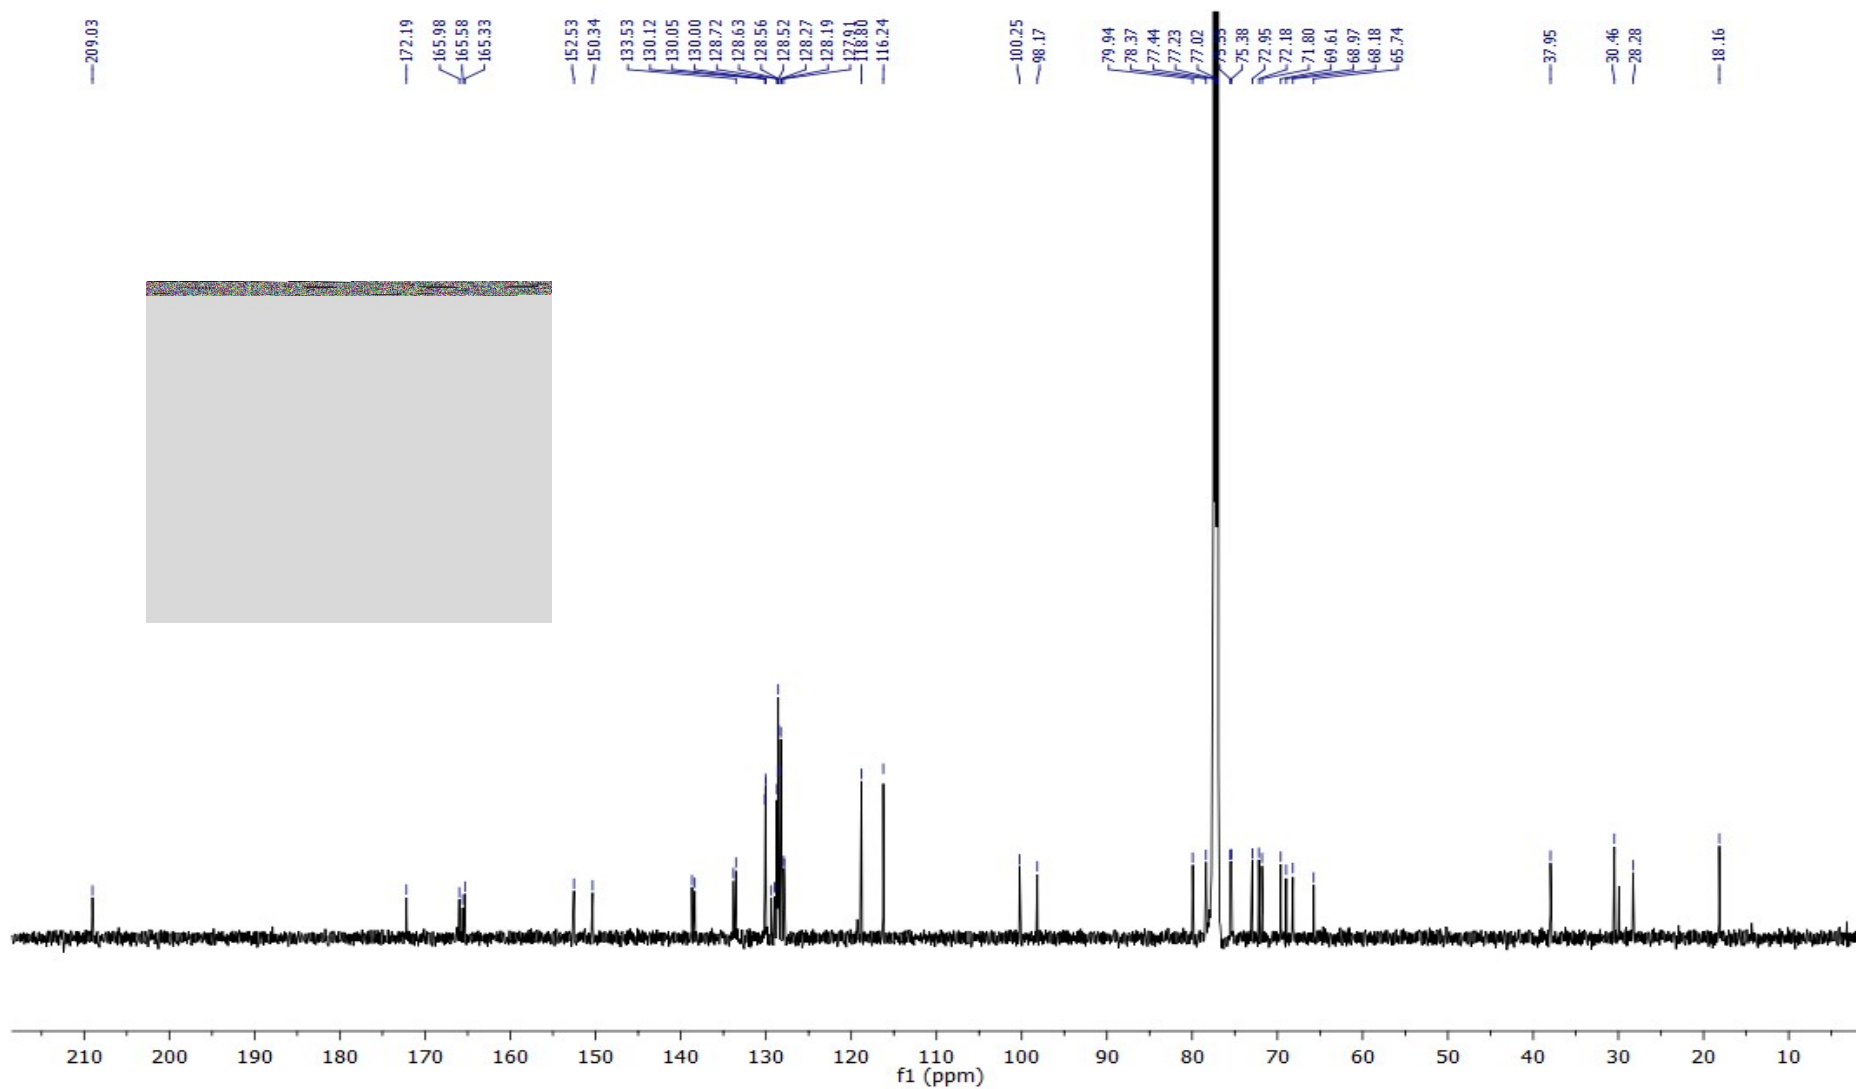



COSY NMR of 4-hydroxyphenyl-2-O-levulinate-3,4-di-O-benzyl- $\alpha$ -L-rhamnopyranosyl-(1 $\rightarrow$ 6)-2,3,4-tri-O-benzyl- $\beta$ -D-glucopyranoside (15a)

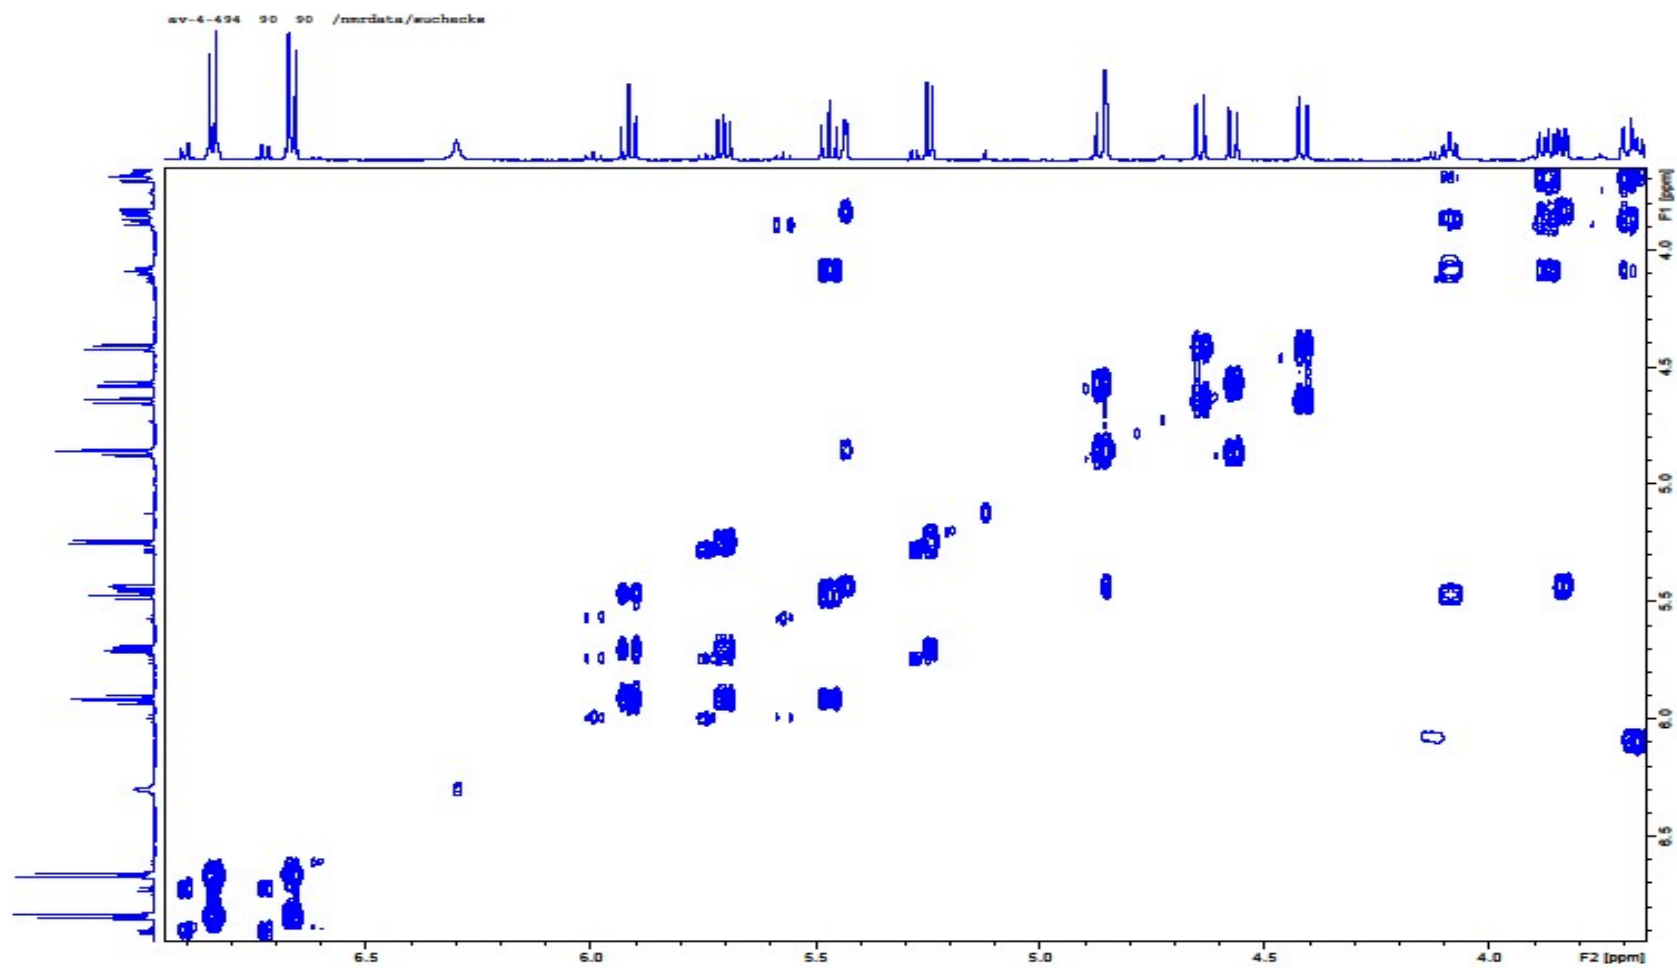

ESI-MS data of 4-hydroxyphenyl-2,3,4-tri-*O*-benzoyl-6-*O*-*t*-butyldiphenylsilyl- $\beta$ -D-glucopyranosyl-(1 $\rightarrow$ 2)-3,4-di-*O*-benzyl- $\alpha$ -L-rhamnopyranosyl-(1 $\rightarrow$ 6)-2,3,4-tri-*O*-benzyl- $\beta$ -D-glucopyranoside (17a)

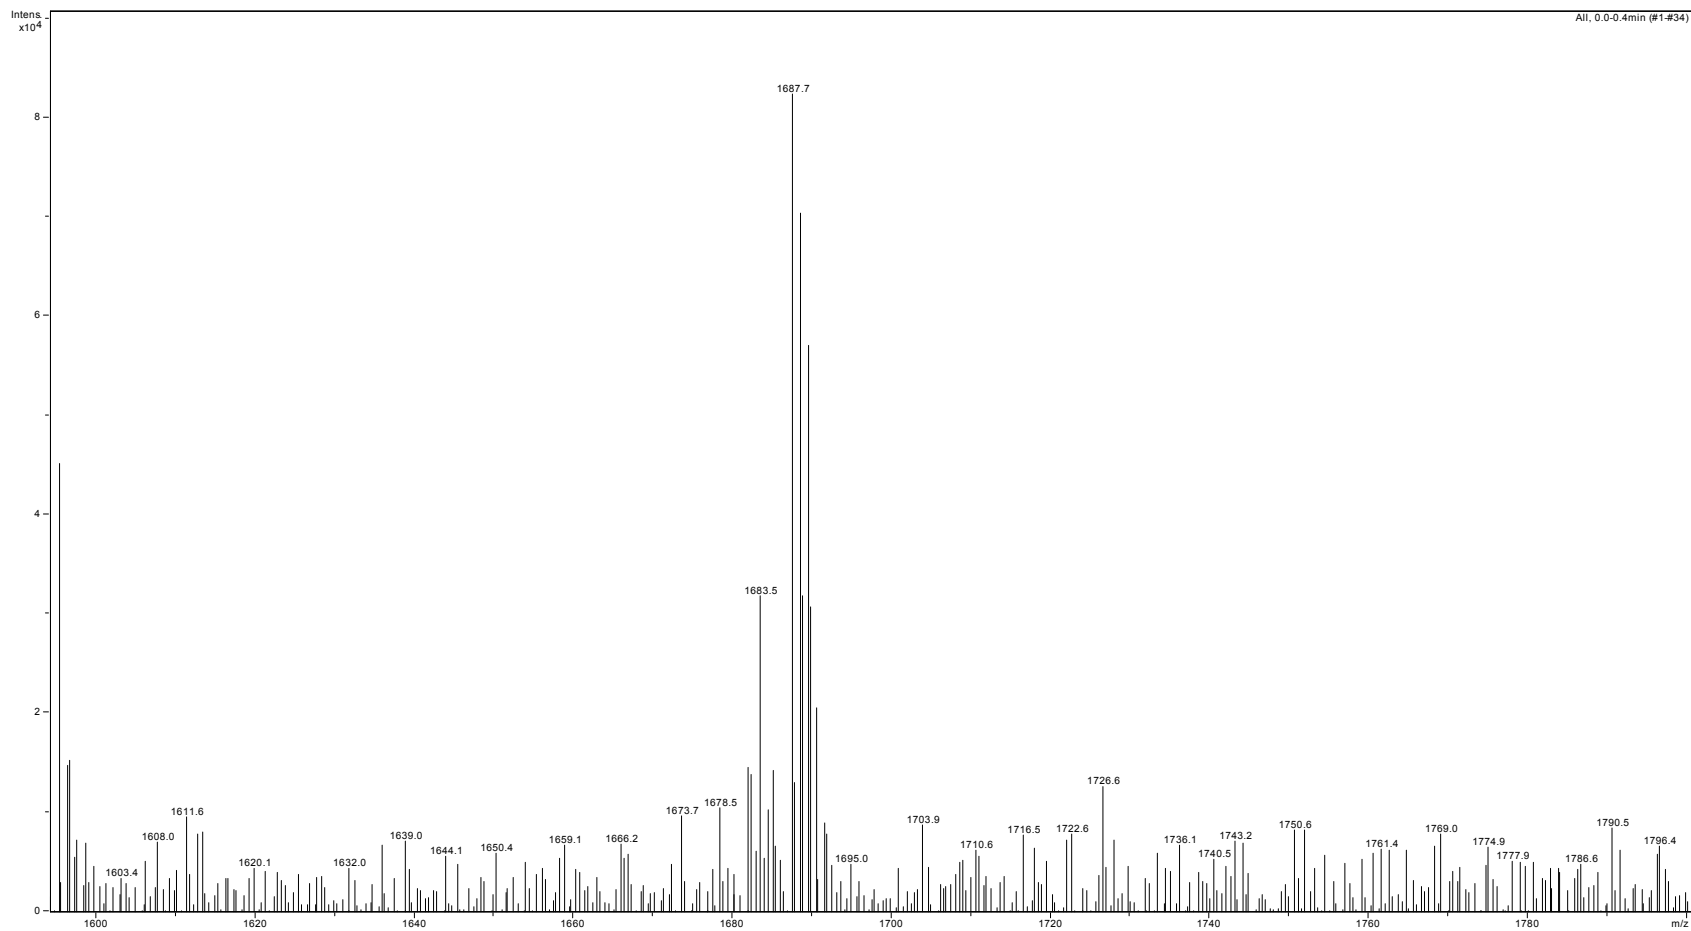

<sup>1</sup>H NMR of 4-hydroxyphenyl-2,3,4-tri-*O*-benzoyl-6-*O*-*t*-butyldiphenylsilyl-β-D-glucopyranosyl-(1→2)-3,4-di-*O*-benzyl-α-L-rhamnopyranosyl-(1→6)-2,3,4-tri-*O*-benzyl-β-D-glucopyranoside (17a)

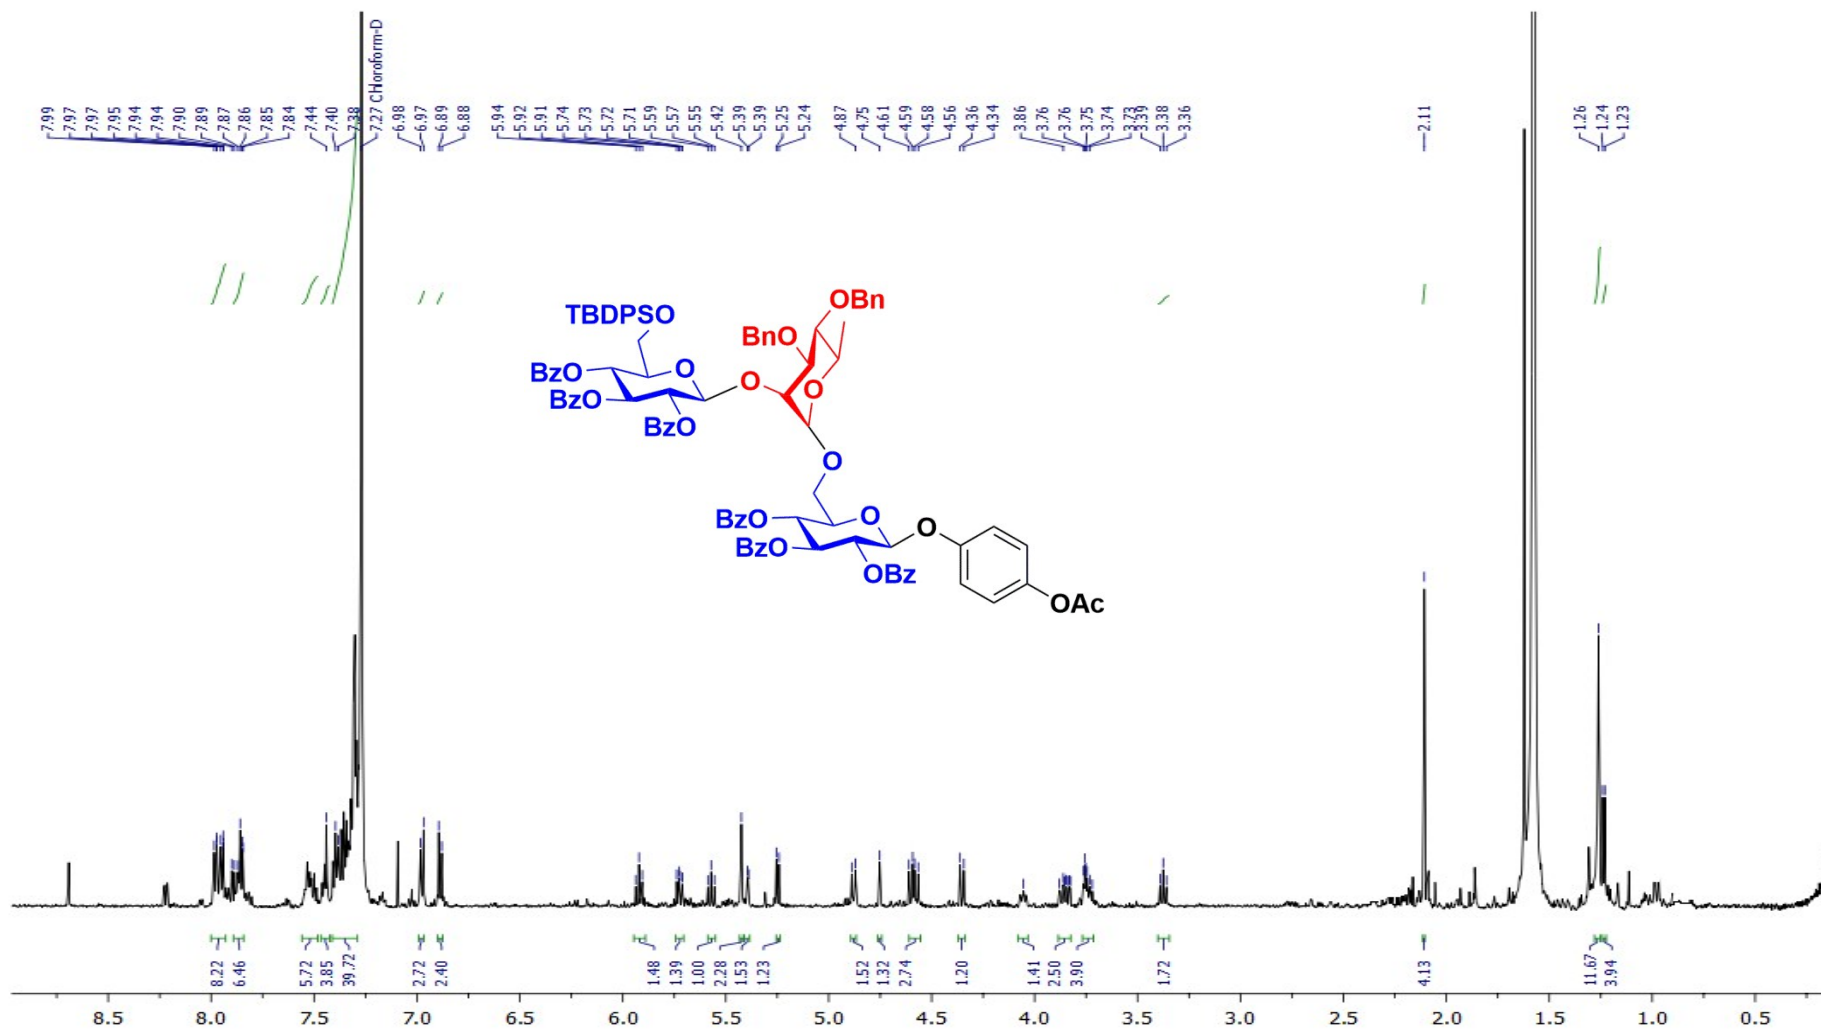

<sup>1</sup>H NMR of 4-hydroxyphenyl-2,3,4-tri-*O*-benzoyl-6-*O*-*t*-butyldiphenylsilyl-β-D-glucopyranosyl-(1→2)-3,4-di-*O*-benzyl-α-L-rhamnopyranosyl-(1→6)-2,3,4-tri-*O*-benzyl-β-D-glucopyranoside (17a)

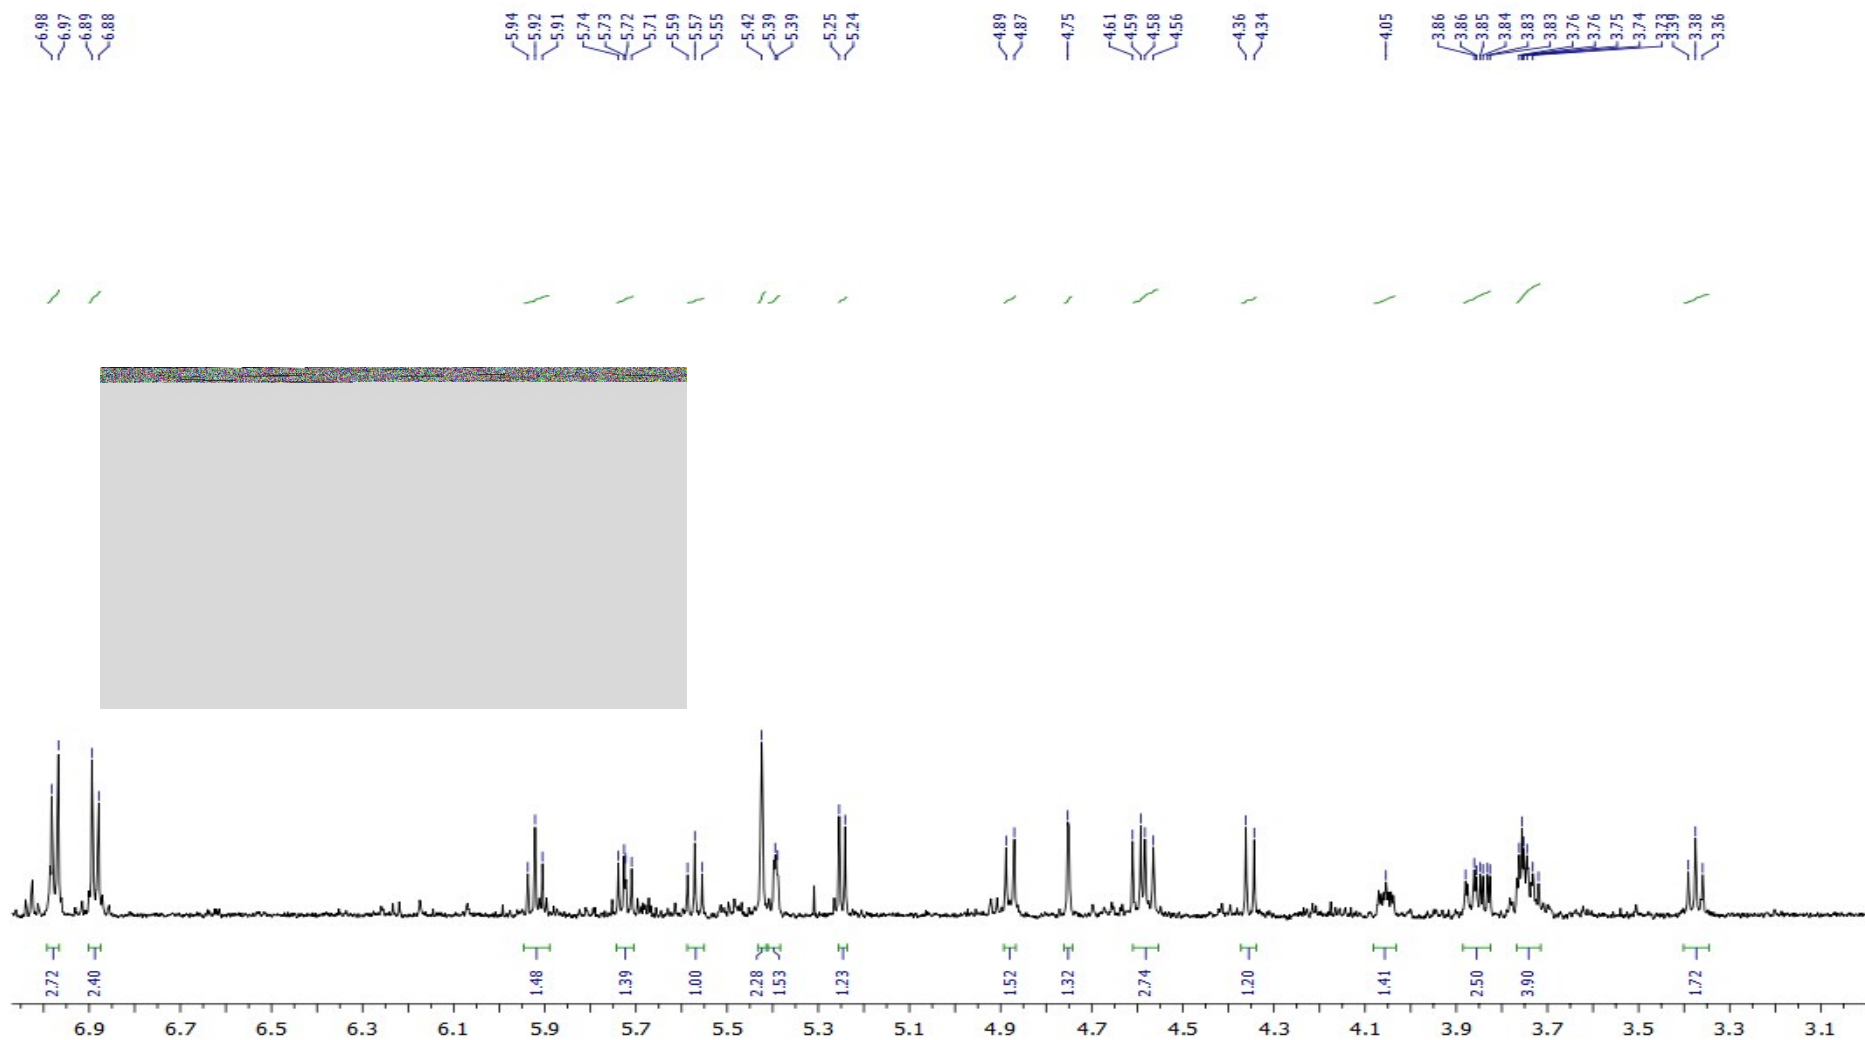

<sup>13</sup>C NMR of 4-hydroxyphenyl-2,3,4-tri-*O*-benzoyl-6-*O*-*t*-butyldiphenylsilyl-β-D-glucopyranosyl-(1→2)-3,4-di-*O*-benzyl-α-L-rhamnopyranosyl-(1→6)-2,3,4-tri-*O*-benzyl-β-D-glucopyranoside (17a)

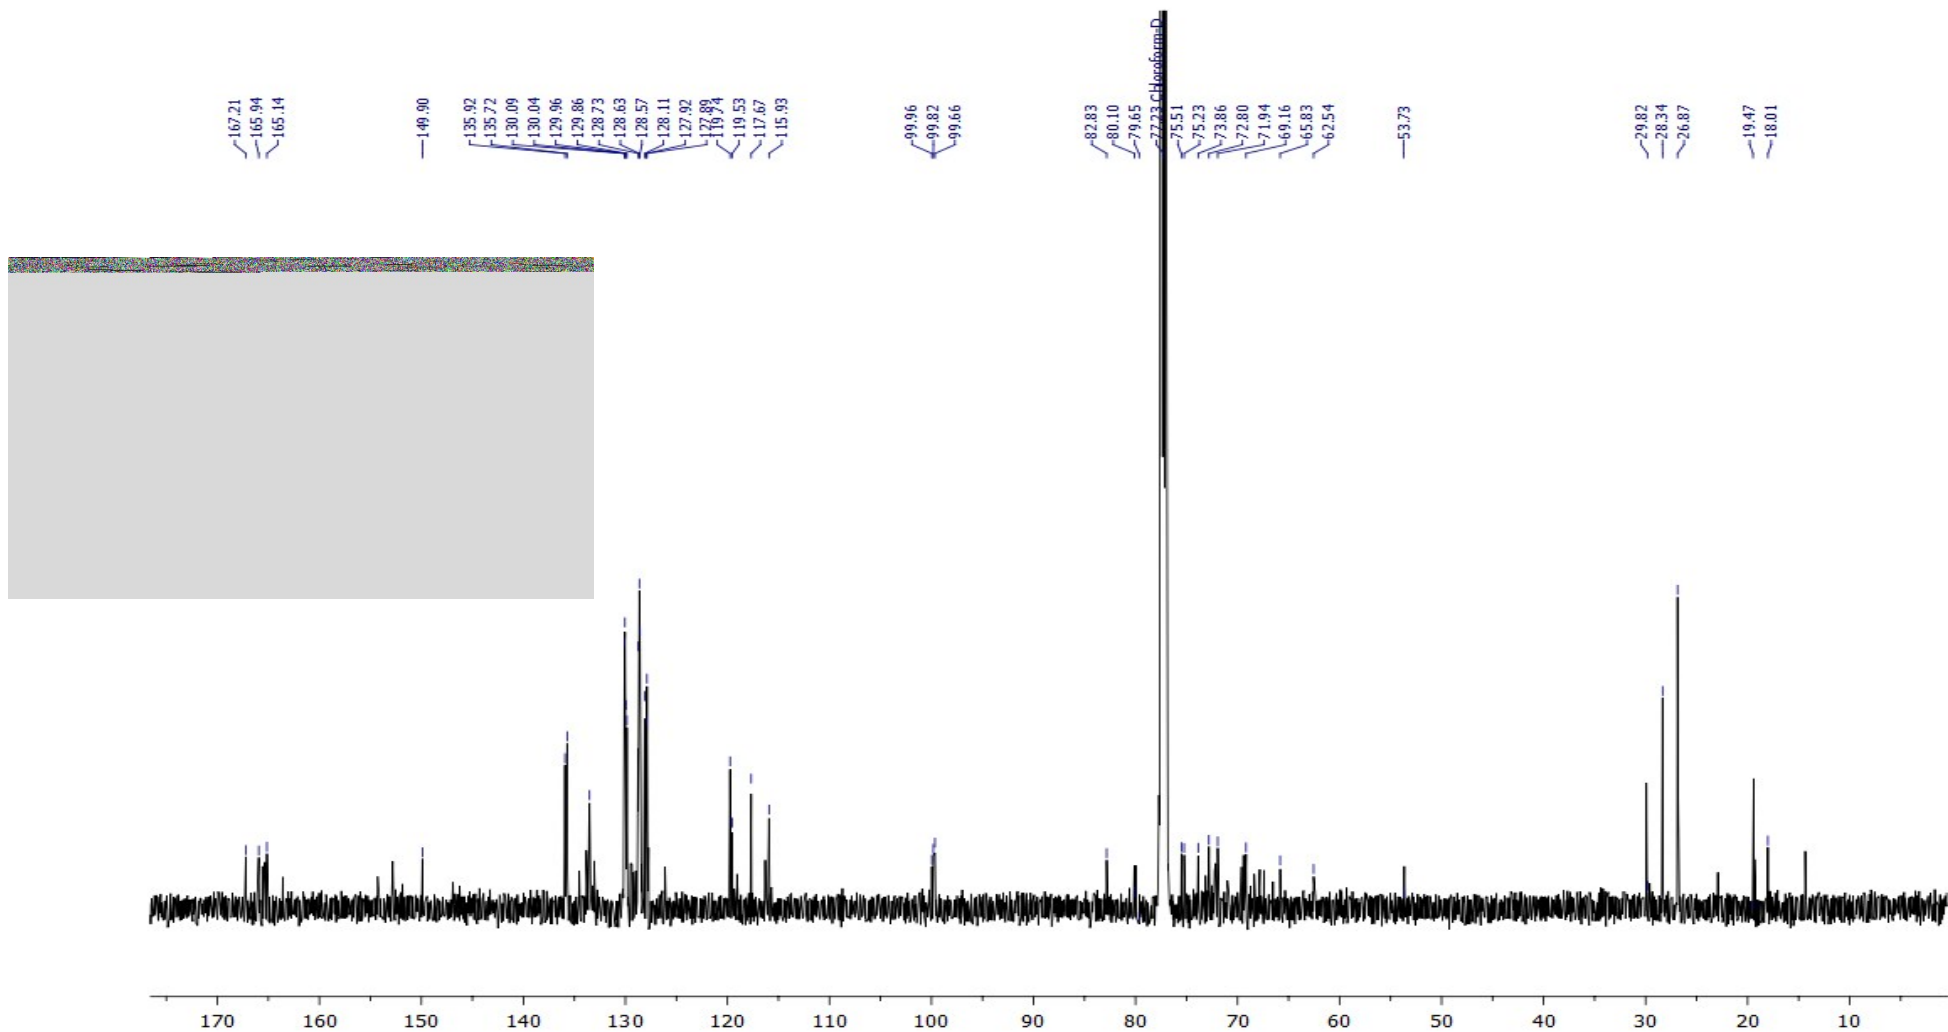

COSY NMR of 4-hydroxyphenyl-2,3,4-tri-*O*-benzoyl-6-*O*-*t*-butyldiphenylsilyl- $\beta$ -D-glucopyranosyl-(1 $\rightarrow$ 2)-3,4-di-*O*-benzyl- $\alpha$ -L-rhamnopyranosyl-(1 $\rightarrow$ 6)-2,3,4-tri-*O*-benzyl- $\beta$ -D-glucopyranoside (17a)

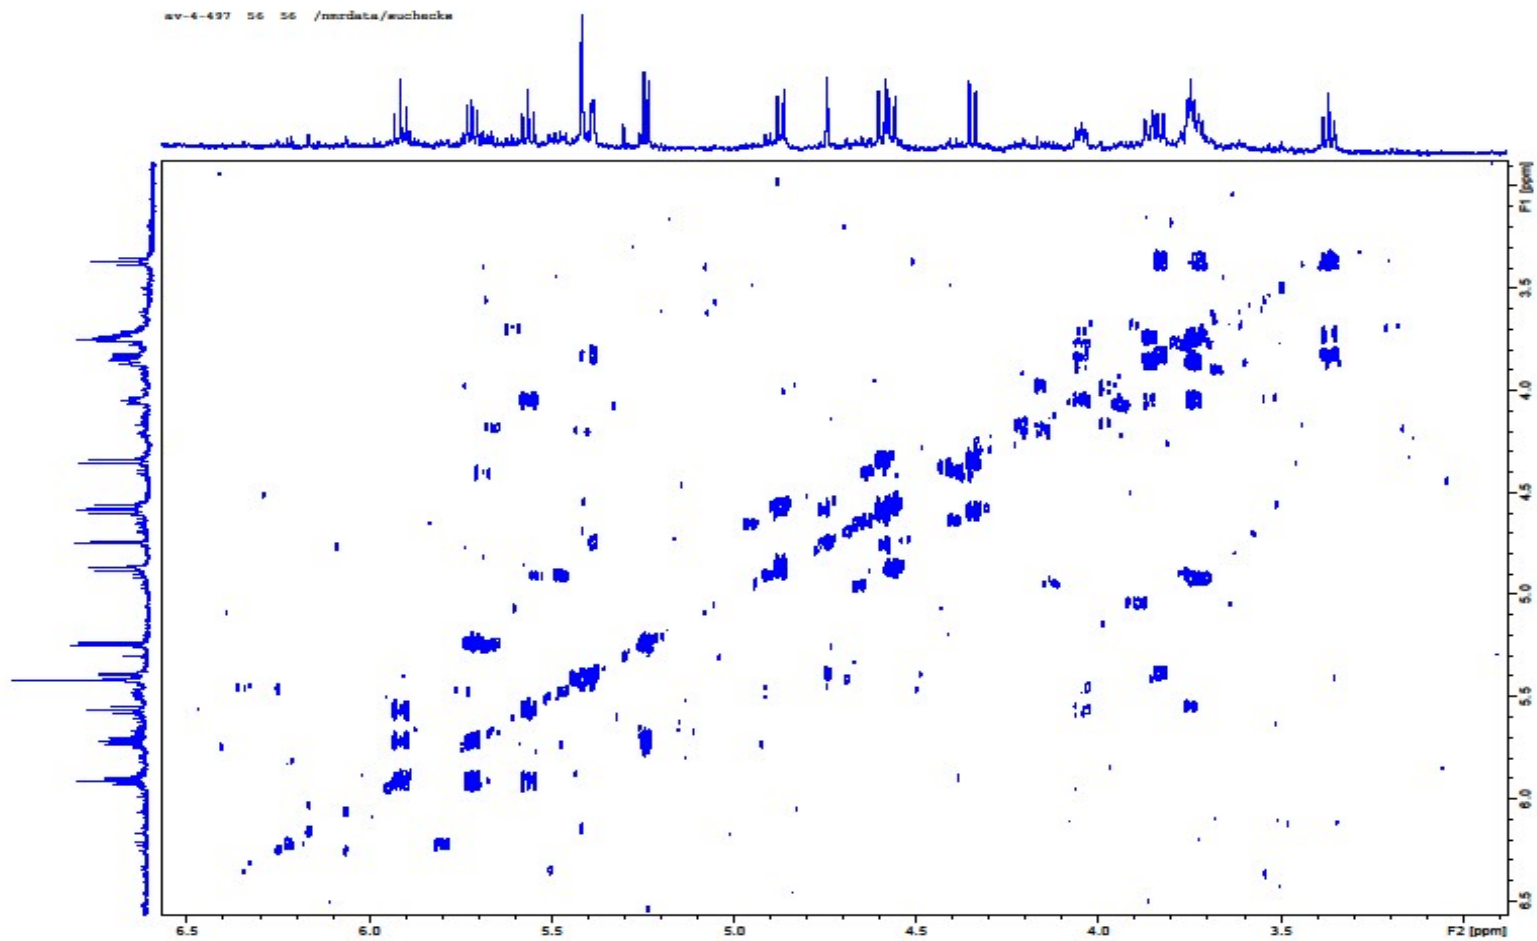

Supplement: c8ra08252a1.pdf [file c8ra08252a1.pdf]
